# Supplementary material
Source: PubMed Central journal article supplement (PMC2823856)
Supplement: NIHMS167684-supplement-01.pdf [file NIHMS167684-supplement-01.pdf]

| Probe        | Gene name                                                                                        | Symbol           | Location         | Unigene                | LocusLink  | SCZ-CNT SG pval | SCZ-CNT SG ALR |
|--------------|--------------------------------------------------------------------------------------------------|------------------|------------------|------------------------|------------|-----------------|----------------|
| 211696_x_at  | hemoglobin, beta /// hemoglobin, beta                                                            | HBB              | chr11p15.5       | Hs.523443              | 3043       | 0.035108        | 1.62           |
| 227697_at    | suppressor of cytokine signaling 3                                                               | SOCS3            | chr17q25.3       | Hs.527973              | 9021       | 0.023769        | 1.59           |
| 209396_s_at  | chitinase 3-like 1 (cartilage glycoprotein-39)                                                   | CHI3L1           | chr1q32.1        | Hs.382202              | 1116       | 0.038525        | 1.46           |
| 36711_at     | v-maf musculoaponeurotic fibrosarcoma oncogene homolog F (avian)                                 | MAFF             | chr22q13.1       | Hs.517617              | 23764      | 0.039594        | 1.27           |
| 202912_at    | adrenomedullin                                                                                   | ADM              | chr11p15.4       | Hs.441047              | 133        | 0.049439        | 1.26           |
| 207574_s_at  | growth arrest and DNA-damage-inducible, beta                                                     | GADD45B          | chr19p13.3       | Hs.110571              | 4616       | 0.044614        | 1.21           |
| 212203_x_at  | interferon induced transmembrane protein 3 (1-8U)                                                | IFITM3           | chr11p15.5       | Hs.374650              | 10410      | 0.019347        | 1.18           |
| 201613_s_at  | adaptor-related protein complex 1, gamma 2 subunit                                               | AP1G2            | chr14q11.2       | Hs.343244              | 8906       | 0.002995        | 1.17           |
| 213560_at    | Growth arrest and DNA-damage-inducible, beta                                                     | GADD45B          | chr19p13.3       | Hs.110571              | 4616       | 0.046790        | 1.17           |
| 202284_s_at  | cyclin-dependent kinase inhibitor 1A (p21, Cip1)                                                 | CDKN1A           | chr6p21.2        | Hs.370771              | 1026       | 0.009753        | 1.10           |
| 201315_x_at  | interferon induced transmembrane protein 2 (1-8D)                                                | IFITM2           | chr11p15.5       | Hs.174195              | 10581      | 0.027505        | 1.09           |
| 236448_at    | unc-5 homolog A (C. elegans)                                                                     | UNC5A            | chr5q35.2        | Hs.33191               | 90249      | 0.014266        | 1.09           |
| 235867_at    | glutathione S-transferase M3 (brain)                                                             | GSTM3            | chr1p13.3        | Hs.2006                | 2947       | 0.007112        | 1.08           |
| 219019_at    | leucine-rich repeats and death domain containing                                                 | LRDD             | chr11p15.5       | Hs.552597              | 55367      | 0.001621        | 1.07           |
| 213571_s_at  | eukaryotic translation initiation factor 4E member 2                                             | EIF4E2           | chr2q37.1        | Hs.292026              | 9470       | 0.006901        | 1.07           |
| 1553993_s_at | mediator of RNA polymerase II transcription, subunit 25 homolog (yeast)                          | MED25            | chr19q13.3       | Hs.467128              | 81857      | 0.002369        | 1.05           |
| 226640_at    | KCCR13L                                                                                          | LOC221955        | chr7p22.1        | Hs.487498              | 221955     | 0.009000        | 1.04           |
| 201506_at    | transforming growth factor, beta-induced, 68kDa                                                  | TGFB1            | chr5q31          | Hs.369397              | 7045       | 0.036300        | 1.04           |
| 201841_s_at  | heat shock 27kDa protein 1                                                                       | HSPB1            | chr7q11.23       | Hs.520973              | 3315       | 0.000410        | 1.02           |
| 230757_at    | FLJ44796 protein                                                                                 | FLJ44796         | chr5q31.1        | Hs.34198               | 401209     | 0.045225        | 1.01           |
| 91617_at     | DiGeorge syndrome critical region gene 8                                                         | DGCR8            | chr22q11.2       | Hs.533019              | 54487      | 0.006566        | 1.01           |
| 217911_s_at  | BCL2-associated athanogene 3                                                                     | BAG3             | chr10q25.2-q26.2 | Hs.523309              | 9531       | 0.031914        | 1.01           |
| 214655_at    | G protein-coupled receptor 6                                                                     | GPR6             | chr6q21          | Hs.46332               | 2830       | 0.032945        | 1.00           |
| 206850_at    | RAS-related on chromosome 22                                                                     | RRP22            | chr22q12.2       | Hs.73088               | 10633      | 0.040728        | 0.97           |
| 205432_at    | oviductal glycoprotein 1, 120kDa (mucin 9, oviductin)                                            | OVGP1            | chr1p13          | Hs.1154                | 5016       | 0.007629        | 0.94           |
| 212723_at    | phosphatidylserine receptor                                                                      | PTDSR            | chr17q25         | Hs.514505              | 23210      | 0.010992        | 0.93           |
| 212556_at    | scribbled homolog (Drosophila)                                                                   | SCRIB            | chr8q24.3        | Hs.436329              | 23513      | 0.005086        | 0.92           |
| 226814_at    | a disintegrin-like and metalloprotease (reprolysin type) with thrombospondin type 1 motifs       | ADAMTS9          | chr3p14.3-p14.2  | Hs.549184              | 56999      | 0.014068        | 0.92           |
| 214097_at    | ribosomal protein S21                                                                            | RPS21            | chr20q13.3       | Hs.190968              | 6227       | 0.011556        | 0.92           |
| 201160_s_at  | cold shock domain protein A                                                                      | CSDA             | chr17p13.1       | Hs.221889              | 8531       | 0.024100        | 0.92           |
| 1561306_s_at | stereocilin                                                                                      | STRC             | chr15q15.3       | Hs.550553              | 161497     | 0.016301        | 0.91           |
| 208982_at    | Platelet/endothelial cell adhesion molecule (CD31 antigen)                                       | PECAM1           | chr17q23         | Hs.514412              | 5175       | 0.001551        | 0.90           |
| 227984_at    | Homo sapiens, clone IMAGE:5242623, mRNA, partial cds                                             |                  |                  | Hs.371980              |            | 0.021200        | 0.90           |
| 214022_s_at  |                                                                                                  |                  |                  |                        |            | 0.043149        | 0.90           |
| 211964_at    | collagen, type IV, alpha 2                                                                       | COL4A2           | chr13q34         | Hs.508716              | 1284       | 0.010290        | 0.90           |
| 201601_x_at  | interferon induced transmembrane protein 1 (9-27)                                                | IFITM1           | chr11p15.5       | Hs.458414              | 8519       | 0.007109        | 0.90           |
| 210794_s_at  | maternally expressed 3                                                                           | MEG3             | chr14q32         | Hs.525589              | 55384      | 0.008982        | 0.89           |
| 236045_x_at  | LOC441801                                                                                        |                  | chr17p13.3       | Hs.113418              | 441801     | 0.046585        | 0.89           |
| 201590_x_at  | annexin A2                                                                                       | ANXA2            | chr15q21-q22     | Hs.511605              | 302        | 0.028797        | 0.87           |
| 210427_x_at  | annexin A2                                                                                       | ANXA2            | chr15q21-q22     | Hs.511605              | 302        | 0.020751        | 0.87           |
| 1569872_a_at | Homo sapiens, clone IMAGE:5246470, mRNA /// Homo sapiens, clone IMAGE:5242623, mRNA, partial cds |                  |                  | Hs.371980 /// Hs.54952 |            | 0.039127        | 0.87           |
| 231392_at    | Hypothetical protein BC008326                                                                    | LOC89944         | chr11q25         | Hs.436178              | 89944      | 0.008091        | 0.86           |
| 204326_x_at  | metallothionein 1X                                                                               | MT1X             | chr16q13         | Hs.374950              | 4501       | 0.044621        | 0.86           |
| 242268_at    | CUG triplet repeat, RNA binding protein 2                                                        | CUGBP2           | chr10p13         | Hs.309288              | 10659      | 0.017305        | 0.86           |
| 223895_s_at  | epsin 3                                                                                          | EPN3             | chr17q21.33      | Hs.165904              | 55040      | 0.013197        | 0.86           |
| 204231_s_at  | fatty acid amide hydrolase                                                                       | FAAH             | chr1p35-p34      | Hs.528334              | 2166       | 0.043702        | 0.86           |
| 216950_s_at  | Fc fragment of IgG, high affinity Ia, receptor (CD64)                                            | FCGR1A           | chr1q21.2-q21.3  | Hs.77424               | 2209       | 0.034751        | 0.85           |
| 226679_at    | solute carrier family 26, member 11                                                              | SLC26A11         | chr17q25.3       | Hs.4866                | 284129     | 0.010541        | 0.85           |
| 202039_at    | TGFB1-induced anti-apoptotic factor 1 /// myosin XVIIIa                                          | TIAF1 /// MYO18A | chr17q11.2       | Hs.462589              | 399687 /// | 0.008373        | 0.85           |
| 217250_s_at  | chromodomain helicase DNA binding protein 5                                                      | CHD5             | chr1p36.31       | Hs.522898              | 26038      | 0.006974        | 0.84           |
| 64474_g_at   | DiGeorge syndrome critical region gene 8                                                         | DGCR8            | chr22q11.2       | Hs.533019              | 54487      | 0.000163        | 0.84           |
| 235205_at    | similar to solute carrier family 16 (monocarboxylic acid transporters), member 1                 | LOC346887        | chr8q23.1        | Hs.127286              | 346887     | 0.002054        | 0.84           |
| 209191_at    | tubulin, beta 6                                                                                  | TUBB6            | chr18p11.21      | Hs.193491              | 84617      | 0.027490        | 0.83           |
| 221009_s_at  | angiopoietin-like 4                                                                              | ANGPTL4          | chr19p13.3       | Hs.9613                | 51129      | 0.048483        | 0.83           |
| 219911_s_at  | solute carrier organic anion transporter family, member 4A1                                      | SLCO4A1          | chr20q13.33      | Hs.235782              | 28231      | 0.030355        | 0.83           |
| 237870_at    | hypothetical protein LOC285771                                                                   | LOC285771        | chr6p25.2        | Hs.145597              | 285771     | 0.041068        | 0.83           |
| 237048_at    | Homo sapiens, clone IMAGE:4797878, mRNA, partial cds                                             |                  |                  | Hs.547831              |            | 0.008461        | 0.83           |
| 223316_at    | coiled-coil domain containing 3                                                                  | CCDC3            | chr10p13         | Hs.498720              | 83643      | 0.001474        | 0.82           |
| 201221_s_at  | small nuclear ribonucleoprotein 70kDa polypeptide (RNP antigen)                                  | SNRP70           | chr19q13.3       | Hs.467097              | 6625       | 0.002171        | 0.82           |
| 33132_at     | cleavage and polyadenylation specific factor 1, 160kDa                                           | CPSF1            | chr8q24.23       | Hs.493202              | 29894      | 0.004044        | 0.82           |
| 1560060_s_at | vacuolar protein sorting 37C (yeast)                                                             | VPS37C           | chr11q12.2       | Hs.523715              | 55048      | 0.023378        | 0.82           |
| 203973_s_at  | CCAAT/enhancer binding protein (C/EBP), delta                                                    | CEBPD            | chr8p11.2-p11.1  | Hs.440829              | 1052       | 0.001652        | 0.81           |
| 213900_at    | chromosome 9 open reading frame 61                                                               | C9orf61          | chr9q13-q21      | Hs.118003              | 9413       | 0.039741        | 0.81           |
| 230417_at    | UDP-N-acetyl-alpha-D-galactosamine:polypeptide N-acetylgalactosaminyl transferase 1              | GALNT1           | chr14q24.1       | Hs.21035               | 57452      | 0.003454        | 0.81           |
| 213526_s_at  | presenilin enhancer 2 homolog (C. elegans) /// protein F25965                                    | PSENEN ///       | chr19q13.12 ///  | Hs.534465              | 55851 ///  | 0.036517        | 0.80           |
| 224864_at    | steroid receptor RNA activator 1                                                                 | SRA1             | chr5q31.3        | Hs.32587               | 10011      | 0.017098        | 0.80           |
| 59697_at     | RAB15, member RAS oncogene family                                                                | RAB15            | chr14q23.3       | Hs.512492              | 376267     | 0.018906        | 0.79           |
| 223950_s_at  | FLYWCH-type zinc finger 1                                                                        | FLYWCH1          | chr16p13.3       | Hs.459715              | 84256      | 0.036740        | 0.79           |
| 224447_s_at  | chromosome 17 open reading frame 37 /// chromosome 17 open reading frame 37                      | C17orf37         | chr17q12         | Hs.333526              | 84299      | 0.000864        | 0.79           |
| 226200_at    | valyl-tRNA synthetase 2-like                                                                     | VARS2L           |                  | Hs.102910              | 57176      | 0.007180        | 0.79           |
| 201695_s_at  | nucleoside phosphorylase                                                                         | NP               | chr14q13.1       | Hs.75514               | 4860       | 0.006782        | 0.79           |
| 218148_at    | hypothetical protein FLJ13111                                                                    | FLJ13111         | chr16q22.1       | Hs.288382              | 80152      | 0.041286        | 0.79           |
| 201680_x_at  | arsenate resistance protein ARS2                                                                 | ARS2             | chr7q21          | Hs.111801              | 51593      | 0.004394        | 0.79           |

|              |                                                                                                    |            |                   |           |            |  |          |      |
|--------------|----------------------------------------------------------------------------------------------------|------------|-------------------|-----------|------------|--|----------|------|
| 241035_s_at  | CDNA clone IMAGE:4814828, partial cds                                                              |            |                   | Hs.535810 |            |  | 0.049405 | 0.79 |
| 200986_at    | serine (or cysteine) proteinase inhibitor, clade G (C1 inhibitor), member                          | SERPING1   | chr11q12-q13.1    | Hs.384598 | 710        |  | 0.048110 | 0.79 |
| 213485_s_at  | ATP-binding cassette, sub-family C (CFTR/MRP), member 10                                           | ABCC10     | chr6p21.1         | Hs.55879  | 89845      |  | 0.049462 | 0.78 |
| 202756_s_at  | glypican 1                                                                                         | GPC1       | chr2q35-q37       | Hs.328232 | 2817       |  | 0.034910 | 0.78 |
| 231478_at    | Transcribed locus, strongly similar to NP_000914.1 phosphodiesterase 4C, cAMP-specific (phosphodie |            |                   | Hs.132584 |            |  | 0.001467 | 0.78 |
| 35666_at     | sema domain, immunoglobulin domain (Ig), short basic domain, secreted                              | SEMA3F     | chr3p21.3         | Hs.32981  | 6405       |  | 0.011114 | 0.78 |
| 1556776_a_at | Zinc finger protein 426                                                                            | ZNF426     | chr19p13.2        | Hs.324978 | 79088      |  | 0.043149 | 0.77 |
| 221538_s_at  | plexin A1                                                                                          | PLXNA1     | chr3q21.3         | Hs.432329 | 5361       |  | 0.019334 | 0.77 |
| 203938_s_at  | TATA box binding protein (TBP)-associated factor, RNA polymerase I, C, 1                           | TAF1C      | chr16q24          | Hs.153022 | 9013       |  | 0.003640 | 0.77 |
| 228532_at    | hypothetical protein MGC24133                                                                      | MGC24133   | chr1p13.2         | Hs.288010 | 128346     |  | 0.025756 | 0.77 |
| 228918_at    | Solute carrier family 43, member 2                                                                 | SLC43A2    | chr17p13.3        | Hs.160550 | 124935     |  | 0.035260 | 0.77 |
| 230418_s_at  | UDP-N-acetyl-alpha-D-galactosamine:polypeptide N-acetylgalactosaminyl                              | GALNTL1    | chr14q24.1        | Hs.21035  | 57452      |  | 0.004051 | 0.77 |
| 213870_at    | collagen, type XI, alpha 2                                                                         | COL11A2    | chr6p21.3         | Hs.390171 | 1302       |  | 0.013513 | 0.77 |
| 225899_x_at  | hypothetical protein LOC284701 /// hypothetical gene supported by AK1                              | LOC284701  | chr1p36.33 /// ch | Hs.546654 | 284701 /// |  | 0.024446 | 0.76 |
| 37254_at     | zinc finger protein 133 (clone pHZ-13)                                                             | ZNF133     | chr20p11.23-20p   | Hs.472221 | 7692       |  | 0.003661 | 0.76 |
| 203385_at    | diacylglycerol kinase, alpha 80kDa                                                                 | DGKA       | chr12q13.3        | Hs.524488 | 1606       |  | 0.037461 | 0.76 |
| 224186_s_at  | ring finger protein 123                                                                            | RNF123     | chr3p24.3         | Hs.551556 | 63891      |  | 0.039047 | 0.76 |
| 237783_at    | PLAC8-like 1                                                                                       | PLAC8L1    | chr5q32           | Hs.162369 | 153770     |  | 0.014717 | 0.76 |
| 227131_at    | mitogen-activated protein kinase kinase kinase 3                                                   | MAP3K3     | chr17q23.3        | Hs.29282  | 4215       |  | 0.004176 | 0.75 |
| 1555958_at   | cartilage acidic protein 1                                                                         | CRTAC1     | chr10q22          | Hs.500741 | 55118      |  | 0.027410 | 0.75 |
| 224162_s_at  | F-box protein 31                                                                                   | FBXO31     | chr16q24.2        | Hs.549198 | 79791      |  | 0.001237 | 0.75 |
| 242931_at    | Transcribed locus                                                                                  |            |                   | Hs.175048 |            |  | 0.045834 | 0.75 |
| 205741_s_at  | dystrobrevin, alpha                                                                                | DTNA       | chr18q12          | Hs.58919  | 1837       |  | 0.015788 | 0.75 |
| 219627_at    | hypothetical protein FLJ12700                                                                      | FLJ12700   | chr7q36.1         | Hs.520785 | 79970      |  | 0.033508 | 0.74 |
| 212735_at    | KIAA0226                                                                                           | KIAA0226   | chr3q29           | Hs.478868 | 9711       |  | 0.005899 | 0.74 |
| 208335_s_at  | Duffy blood group                                                                                  | FY         | chr1q21-q22       | Hs.153381 | 2532       |  | 0.014185 | 0.74 |
| 227896_at    | BRCA2 and CDKN1A interacting protein                                                               | BCCIP      | chr10q26.1        | Hs.370292 | 56647      |  | 0.000912 | 0.73 |
| 214096_s_at  | serine hydroxymethyltransferase 2 (mitochondrial)                                                  | SHMT2      | chr12q12-q14      | Hs.75069  | 6472       |  | 0.010960 | 0.73 |
| 209785_s_at  | phospholipase A2, group IVC (cytosolic, calcium-independent)                                       | PLA2G4C    | chr19q13.3        | Hs.18858  | 8605       |  | 0.012120 | 0.73 |
| 210069_at    | choline kinase beta /// carnitine palmitoyltransferase 1B (muscle)                                 | CHKB /// C | chr22q13.33       | Hs.439777 | 1120 /// 1 |  | 0.028615 | 0.73 |
| 213178_s_at  | mitogen-activated protein kinase 8 interacting protein 3                                           | MAPK8IP3   | chr16p13.3        | Hs.207763 | 23162      |  | 0.011718 | 0.73 |
| 228111_s_at  | heat shock regulated 1                                                                             | XLHRSF-1   | chr3p21.31        | Hs.9740   | 25981      |  | 0.005760 | 0.73 |
| 205918_at    | solute carrier family 4, anion exchanger, member 3                                                 | SLC4A3     | chr2q36           | Hs.1176   | 6508       |  | 0.011747 | 0.73 |
| 1555363_s_at | hypothetical protein MGC39821                                                                      | MGC39821   | chr19p13.11       | Hs.351906 | 284440     |  | 0.044671 | 0.72 |
| 209909_s_at  | transforming growth factor, beta 2                                                                 | TGFbeta 2  | chr1q41           | Hs.133379 | 7042       |  | 0.023798 | 0.72 |
| 216960_s_at  | zinc finger protein 133 (clone pHZ-13)                                                             | ZNF133     | chr20p11.23-20p   | Hs.472221 | 7692       |  | 0.014483 | 0.72 |
| 1556464_a_at | hypothetical protein LOC257407                                                                     | LOC257407  | chr2q37.1         | Hs.526596 | 257407     |  | 0.009418 | 0.72 |
| 240048_at    | Stereocilin                                                                                        | STRC       | chr15q15.3        | Hs.550553 | 161497     |  | 0.021064 | 0.72 |
| 202953_at    | complement component 1, q subcomponent, beta polypeptide                                           | C10B       | chr1p36.3-p34.1   | Hs.8986   | 713        |  | 0.045149 | 0.72 |
| 209467_s_at  | MAP kinase interacting serine/threonine kinase 1                                                   | MKNK1      | chr1p33           | Hs.371594 | 8569       |  | 0.000111 | 0.72 |
| 38157_at     | dom-3 homolog Z (C. elegans)                                                                       | DOM3Z      | chr6p21.3         | Hs.153299 | 1797       |  | 0.011530 | 0.71 |
| 220027_s_at  | Ras interacting protein 1                                                                          | RASIP1     | chr19p13.33       | Hs.233955 | 54922      |  | 0.033306 | 0.71 |
| 223843_at    | scavenger receptor class A, member 3                                                               | SCARA3     | chr8p21           | Hs.128856 | 51435      |  | 0.009761 | 0.71 |
| 225596_at    | kinesin-like 8                                                                                     | KNSL8      | chr6p21.1         | Hs.408062 | 89953      |  | 0.023026 | 0.70 |
| 214486_x_at  | CASP8 and FADD-like apoptosis regulator                                                            | CFLAR      | chr2q33-q34       | Hs.390736 | 8837       |  | 0.021237 | 0.70 |
| 201186_at    | low density lipoprotein receptor-related protein associated protein 1                              | LRPAP1     | chr4p16.3         | Hs.533136 | 4043       |  | 0.026724 | 0.70 |
| 200710_at    | acyl-Coenzyme A dehydrogenase, very long chain                                                     | ACADVL     | chr17p13-p11      | Hs.437178 | 37         |  | 0.012119 | 0.70 |
| 213946_s_at  | KIAA0657 protein                                                                                   | KIAA0657   | chr2q35           | Hs.526594 | 23363      |  | 0.007247 | 0.70 |
| 235964_x_at  | SAM domain and HD domain 1                                                                         | SAMHD1     | chr20pter-q12     | Hs.472630 | 25939      |  | 0.012588 | 0.70 |
| 227543_at    | AYP1 protein                                                                                       | AYP1       | chr1q13.1         | Hs.397010 | 84153      |  | 0.001214 | 0.70 |
| 225067_at    | unc-51-like kinase 3 (C. elegans)                                                                  | ULK3       | chr15q24.1        | Hs.513034 | 25989      |  | 0.002394 | 0.70 |
| 244113_at    | Transcribed locus                                                                                  |            |                   | Hs.436567 |            |  | 0.015718 | 0.69 |
| 229100_s_at  | translocase of inner mitochondrial membrane 22 homolog (yeast)                                     | TIMM22     | chr17p13          | Hs.87595  | 29928      |  | 0.025593 | 0.69 |
| 243818_at    | Surfactant associated protein F mRNA, partial sequence, mRNA sequence                              |            |                   | Hs.31562  |            |  | 0.045689 | 0.69 |
| 238364_x_at  | GLI-Kruppel family member GLI4                                                                     | GLI4       | chr8q24.3         | Hs.400533 | 2738       |  | 0.011344 | 0.69 |
| 50965_at     | RAB26, member RAS oncogene family                                                                  | RAB26      | chr16p13.3        | Hs.3797   | 25837      |  | 0.008853 | 0.69 |
| 225306_s_at  | solute carrier family 25, member 29                                                                | SLC25A29   | chr14q32.2        | Hs.497598 | 123096     |  | 0.015357 | 0.69 |
| 218205_s_at  | MAP kinase interacting serine/threonine kinase 2                                                   | MKNK2      | chr19p13.3        | Hs.515032 | 2872       |  | 0.023387 | 0.69 |
| 203430_at    | heme binding protein 2                                                                             | HEBP2      | chr6q24           | Hs.486589 | 23593      |  | 0.016628 | 0.69 |
| 205493_s_at  | dihydropyrimidinase-like 4                                                                         | DPYSL4     | chr10q26          | Hs.100058 | 10570      |  | 0.006240 | 0.69 |
| 222047_s_at  | arsenate resistance protein ARS2                                                                   | ARS2       | chr7q21           | Hs.111801 | 51593      |  | 0.007634 | 0.68 |
| 236070_at    | similar to Retinol dehydrogenase 12                                                                | LOC388963  | chr2p13.1         | Hs.445377 | 388963     |  | 0.013774 | 0.68 |
| 215147_at    | CUG triplet repeat, RNA binding protein 2                                                          | CUGBP2     | chr10p13          | Hs.309288 | 10659      |  | 0.027239 | 0.68 |
| 217973_at    | dicarbonyl/L-xylulose reductase                                                                    | DCXR       | chr17q25.3        | Hs.9857   | 51181      |  | 0.021451 | 0.68 |
| 218103_at    | FtsJ homolog 3 (E. coli)                                                                           | FTSJ3      | chr17q23          | Hs.463785 | 117246     |  | 0.030629 | 0.68 |
| 203119_at    | hypothetical protein MGC2574                                                                       | MGC2574    | chr11q12.2        | Hs.4253   | 79080      |  | 0.013058 | 0.68 |
| 221647_s_at  | likely ortholog of mouse synembryn                                                                 | RIC8       | chr11p15.5        | Hs.19306  | 60626      |  | 0.004798 | 0.68 |
| 221645_s_at  | zinc finger protein 83 (HPF1)                                                                      | ZNF83      | chr19q13.3        | Hs.467210 | 55769      |  | 0.036978 | 0.68 |
| 235529_x_at  | SAM domain and HD domain 1                                                                         | SAMHD1     | chr20pter-q12     | Hs.472630 | 25939      |  | 0.018115 | 0.68 |
| 228177_at    | CREB binding protein (Rubinstein-Taybi syndrome)                                                   | CREBBP     | chr16p13.3        | Hs.459759 | 1387       |  | 0.019435 | 0.68 |
| 204294_at    | aminomethyltransferase (glycine cleavage system protein T)                                         | AMT        | chr3p21.2-p21.1   | Hs.102    | 275        |  | 0.031621 | 0.68 |
| 203468_at    | cyclin-dependent kinase (CDC-like) 10                                                              | CDK10      | chr16q24          | Hs.77313  | 8558       |  | 0.019397 | 0.67 |
| 203911_at    | RAP1, GTPase activating protein 1                                                                  | RAP1GA1    | chr1p36.1-p35     | Hs.148178 | 5909       |  | 0.046967 | 0.67 |
| 210247_at    | synapsin II                                                                                        | SYN2       | chr3p25           | Hs.445503 | 6854       |  | 0.006844 | 0.67 |

|              |                                                                           |           |                   |           |            |          |      |
|--------------|---------------------------------------------------------------------------|-----------|-------------------|-----------|------------|----------|------|
| 225868_at    | tripartite motif-containing 47                                            | TRIM47    |                   | Hs.293660 | 91107      | 0.008911 | 0.67 |
| 230932_at    | Transcribed locus                                                         |           |                   | Hs.8038   |            | 0.012802 | 0.67 |
| 220661_s_at  | hypothetical protein FLJ20531                                             | FLJ20531  | chr1q44           | Hs.377705 | 55657      | 0.004482 | 0.67 |
| 210672_s_at  | chromosome 16 open reading frame 35                                       | C16orf35  | chr16p13.3        | Hs.196999 | 8131       | 0.010077 | 0.67 |
| 231171_at    | Transcribed locus                                                         |           |                   | Hs.97104  |            | 0.016592 | 0.67 |
| 214246_x_at  | missshapen-like kinase 1 (zebrafish)                                      | MINK1     | chr17p13.2        | Hs.443417 | 50488      | 0.023888 | 0.67 |
| 207992_s_at  | adenosine monophosphate deaminase (isoform E)                             | AMPD3     | chr11p15          | Hs.501890 | 272        | 0.027470 | 0.67 |
| 219562_at    | RAB26, member RAS oncogene family                                         | RAB26     | chr16p13.3        | Hs.3797   | 25837      | 0.011124 | 0.67 |
| 221820_s_at  | MYST histone acetyltransferase 1                                          | MYST1     | chr16p11.2        | Hs.533803 | 84148      | 0.017207 | 0.67 |
| 221867_at    | Nedd4 binding protein 1                                                   | N4BP1     | chr16q12.1        | Hs.511839 | 9683       | 0.036914 | 0.67 |
| 1559946_s_at | RuvB-like 2 (E. coli)                                                     | RUVBL2    | chr19q13.3        | Hs.515846 | 10856      | 0.013694 | 0.67 |
| 37860_at     | zinc finger protein 337                                                   | ZNF337    | chr20p11.21       | Hs.213735 | 26152      | 0.024961 | 0.67 |
| 227325_at    | hypothetical protein LOC255783                                            | LOC255783 | chr19q13.33       | Hs.128690 | 255783     | 0.040597 | 0.66 |
| 214961_at    | KIAA0774                                                                  | KIAA0774  | chr13q12.3        | Hs.507630 | 23281      | 0.041798 | 0.66 |
| 223467_at    | RAS, dexamethasone-induced 1                                              | RASD1     | chr17p11.2        | Hs.25829  | 51655      | 0.023386 | 0.66 |
| 216336_x_at  | Metallothionein 1K                                                        | MT1K      | chr16q13          | Hs.188518 | 4499       | 0.048381 | 0.66 |
| 219155_at    | phosphatidylinositol transfer protein, cytoplasmic 1                      | PITPNC1   | chr17q24.2        | Hs.549130 | 26207      | 0.045039 | 0.66 |
| 227051_at    | Homo sapiens, clone IMAGE:4393354, mRNA                                   |           |                   | Hs.43047  |            | 0.022130 | 0.66 |
| 206204_at    | growth factor receptor-bound protein 14                                   | GRB14     | chr2q22-q24       | Hs.411881 | 2888       | 0.018319 | 0.65 |
| 238054_at    | ADP-ribosylhydrolase like 1                                               | ADPRHL1   | chr13q34          | Hs.98669  | 113622     | 0.017676 | 0.65 |
| 223983_s_at  | chromosome 19 open reading frame 12                                       | C19orf12  | chr19q12          | Hs.529094 | 83636      | 0.002492 | 0.65 |
| 209179_s_at  | leukocyte receptor cluster (LRC) member 4                                 | LENG4     | chr19q13.4        | Hs.467279 | 79143      | 0.001103 | 0.65 |
| 200840_at    | lysyl-tRNA synthetase                                                     | KARS      | chr16q23-q24      | Hs.3100   | 3735       | 0.036188 | 0.65 |
| 212559_at    | protein kinase, cAMP-dependent, regulatory, type I, beta                  | PRKAR1B   | chr7pter-p22      | Hs.534340 | 5575       | 0.029343 | 0.65 |
| 231400_s_at  | Translocase of inner mitochondrial membrane 22 homolog (yeast)            | TIMM22    | chr17p13          | Hs.87595  | 29928      | 0.043161 | 0.65 |
| 230075_at    | RAB39B, member RAS oncogene family                                        | RAB39B    | chrXq28           | Hs.24970  | 116442     | 0.034099 | 0.65 |
| 203718_at    | neuropathy target esterase                                                | NTE       | chr19p13.3-p13.2  | Hs.511760 | 10908      | 0.019965 | 0.65 |
| 222240_s_at  | myo-inositol 1-phosphate synthase A1                                      | ISYNA1    | chr19p13.11       | Hs.405873 | 51477      | 0.028284 | 0.65 |
| 224735_at    | cytochrome b, ascorbate dependent 3                                       | CYBASC3   | chr11q12.2        | Hs.22546  | 220002     | 0.005958 | 0.65 |
| 218650_at    | DiGeorge syndrome critical region gene 8                                  | DGCR8     | chr22q11.2        | Hs.533019 | 54487      | 0.008720 | 0.65 |
| 218175_at    | limkain beta 2                                                            | FLJ22471  | chr12q24.31       | Hs.114111 | 80212      | 0.024967 | 0.65 |
| 34868_at     | Est1p-like protein B                                                      | EST1B     | chr1q21.2         | Hs.516837 | 23381      | 0.012135 | 0.64 |
| 212360_at    | adenosine monophosphate deaminase 2 (isoform L)                           | AMPD2     | chr1p13.3         | Hs.82927  | 271        | 0.027247 | 0.64 |
| 213273_at    | odz, odd Oz/ten-m homolog 4 (Drosophila)                                  | ODZ4      | chr11q14.1        | Hs.213087 | 26011      | 0.010804 | 0.64 |
| 40569_at     | zinc finger protein 42 (myeloid-specific retinoic acid-responsive)        | ZNF42     | chr19q13.2-q13.4  | Hs.399810 | 7593       | 0.004059 | 0.64 |
| 227618_at    | TPT1-like protein                                                         | FLJ44635  | chrXq13.1         | Hs.496303 | 392490     | 0.026998 | 0.64 |
| 209522_s_at  | carnitine acetyltransferase                                               | CRAT      | chr9q34.1         | Hs.12068  | 1384       | 0.031332 | 0.64 |
| 231118_at    | ankyrin repeat domain 35                                                  | ANKRD35   | chr1q21.1         | Hs.133081 | 148741     | 0.046583 | 0.64 |
| 226610_at    | proline rich 6                                                            | PRR6      | chr17p11.2        | Hs.433422 | 201161     | 0.012359 | 0.64 |
| 208630_at    | hydroxyacyl-Coenzyme A dehydrogenase/3-ketoacyl-Coenzyme A thiolase       | HADHA     | chr2p23           | Hs.516032 | 3030       | 0.036531 | 0.63 |
| 220331_at    | cytochrome P450, family 46, subfamily A, polypeptide 1                    | CYP46A1   | chr14q32.1        | Hs.25121  | 10858      | 0.032352 | 0.63 |
| 229086_at    | hypothetical protein BC007899                                             | LOC148898 | chr1p36.12        | Hs.61884  | 148898     | 0.031211 | 0.63 |
| 202255_s_at  | signal-induced proliferation-associated 1 like 1                          | SIPA1L1   | chr14q24.2        | Hs.208846 | 26037      | 0.024649 | 0.63 |
| 222905_s_at  | hypothetical protein FLJ10922                                             | FLJ10922  | chr19q13.32       | Hs.351335 | 55260      | 0.013978 | 0.63 |
| 203068_at    | kelch-like 21 (Drosophila)                                                | KLHL21    | chr1p36.31        | Hs.7764   | 9903       | 0.000590 | 0.63 |
| 221657_s_at  | ankyrin repeat and SOCS box-containing 6                                  | ASB6      |                   | Hs.125037 | 140459     | 0.009667 | 0.63 |
| 1556938_a_at | CDNA FLJ38433 fis, clone FEBRA2014578                                     |           |                   | Hs.143746 |            | 0.038508 | 0.63 |
| 202440_s_at  | suppression of tumorigenicity 5                                           | ST5       | chr11p15          | Hs.117715 | 6764       | 0.010201 | 0.63 |
| 212359_s_at  | KIAA0913                                                                  | KIAA0913  | chr10q22.2        | Hs.65135  | 23053      | 0.009849 | 0.63 |
| 232792_at    | ring finger protein 36                                                    | RNF36     | chr15q14          | Hs.169810 | 140691     | 0.009628 | 0.63 |
| 57539_at     | zinc finger, CCH-type with G patch domain                                 | ZGPAT     | chr20q13.3        | Hs.11900  | 84619      | 0.035192 | 0.63 |
| 204336_s_at  | regulator of G-protein signalling 19                                      | RGS19     | chr20q13.3        | Hs.422336 | 10287      | 0.032595 | 0.63 |
| 227129_x_at  | hypothetical protein LOC284701 /// hypothetical gene supported by AK1     | LOC284701 | chr1p36.33 /// ch | Hs.546653 | 284701 /// | 0.020602 | 0.63 |
| 224472_x_at  | calcium binding protein Cab45 precursor /// calcium binding protein Cab45 | Cab45     | chr1p36.33        | Hs.42806  | 51150      | 0.014246 | 0.63 |
| 209516_at    | SMYD family member 5                                                      | SMYD5     | chr2p13.2         | Hs.516095 | 10322      | 0.030164 | 0.63 |
| 215235_at    | Spectrin, alpha, non-erythrocytic 1 (alpha-fodrin)                        | SPTAN1    | chr9q33-q34       | Hs.372331 | 6709       | 0.040879 | 0.63 |
| 227207_x_at  | zinc finger protein 213                                                   | ZNF213    | chr16p13.3        | Hs.115284 | 7760       | 0.010313 | 0.62 |
| 212674_s_at  | DEAH (Asp-Glu-Ala-His) box polypeptide 30                                 | DHX30     | chr3p21.31        | Hs.517948 | 22907      | 0.008292 | 0.62 |
| 213620_s_at  |                                                                           |           |                   |           |            | 0.049552 | 0.62 |
| 226072_at    | fucokinase                                                                | FUK       | chr16q22.1        | Hs.7907   | 197258     | 0.007075 | 0.62 |
| 233571_x_at  | chromosome 20 open reading frame 149                                      | C20orf149 | chr20q13.33       | Hs.79625  | 79144      | 0.047274 | 0.62 |
| 229867_at    | BTB (POZ) domain containing 9                                             | BTBD9     | chr6p21           | Hs.116233 | 114781     | 0.017748 | 0.62 |
| 214511_x_at  |                                                                           |           |                   |           |            | 0.041274 | 0.62 |
| 215280_s_at  | protein tyrosine phosphatase, receptor type, f polypeptide (PTPRF), inter | PPFIA3    | chr19q13.33       | Hs.413748 | 8541       | 0.039859 | 0.62 |
| 235420_at    | hyaluronan and proteoglycan link protein 4                                | HAPLN4    | chr19p13.1        | Hs.367829 | 404037     | 0.005621 | 0.62 |
| 210142_x_at  | flotillin 1                                                               | FLOT1     | chr6p21.3         | Hs.179986 | 10211      | 0.006780 | 0.62 |
| 45526_g_at   | hypothetical protein FLJ14154                                             | FLJ14154  | chr16p13.3        | Hs.513296 | 79903      | 0.009637 | 0.62 |
| 218631_at    | arginine vasopressin-induced 1                                            | AVP11     | chr10q24.2        | Hs.23918  | 60370      | 0.034818 | 0.61 |
| 218697_at    | NCK interacting protein with SH3 domain                                   | NCKIPSD   | chr3p21           | Hs.102929 | 51517      | 0.023000 | 0.61 |
| 210336_x_at  | zinc finger protein 42 (myeloid-specific retinoic acid-responsive)        | ZNF42     | chr19q13.2-q13.4  | Hs.399810 | 7593       | 0.003071 | 0.61 |
| 201851_at    | SH3-domain GRB2-like 1                                                    | SH3GL1    | chr19p13.3        | Hs.97616  | 6455       | 0.024574 | 0.61 |
| 229310_at    | kelch repeat and BTB (POZ) domain containing 9                            | KBTBD9    | chr2p24.1         | Hs.130593 | 114818     | 0.035858 | 0.61 |
| 205056_s_at  | gene rich cluster, A gene                                                 | GRCA      | chr12p13          | Hs.418105 | 27239      | 0.006912 | 0.61 |
| 36030_at     | HOM-TES-103 tumor antigen-like                                            | HOM-TES-1 | chr12p13.3        | Hs.15243  | 25900      | 0.016186 | 0.61 |

|             |                                                                             |               |                  |           |        |          |       |
|-------------|-----------------------------------------------------------------------------|---------------|------------------|-----------|--------|----------|-------|
| 33760_at    | peroxisomal biogenesis factor 14                                            | PEX14         | chr1p36.22       | Hs.149983 | 5195   | 0.017942 | 0.61  |
| 201743_at   | CD14 antigen /// CD14 antigen                                               | CD14          | chr5q22-q32 5q3  | Hs.163867 | 929    | 0.032139 | 0.61  |
| 1558412_at  | hypothetical protein LOC113230                                              | LOC113230     | chr19p13.12      | Hs.372775 | 113230 | 0.021854 | 0.61  |
| 239064_at   | CDNA FLJ36582 fis, clone TRACH2013081                                       |               |                  | Hs.182514 |        | 0.024654 | 0.61  |
| 37462_i_at  | splicing factor 3a, subunit 2, 66kDa                                        | SF3A2         | chr19p13.3-p13.2 | Hs.115232 | 8175   | 0.033547 | 0.61  |
| 227308_x_at | latent transforming growth factor beta binding protein 3                    | LTBP3         | chr11q12         | Hs.289019 | 4054   | 0.003061 | 0.61  |
| 225874_at   | LOC124402                                                                   | LOC124402     | chr16p13.3       | Hs.513313 | 124402 | 0.033844 | 0.61  |
| 204169_at   | IMP (inosine monophosphate) dehydrogenase 1                                 | IMPDH1        | chr7q31.3-q32    | Hs.534808 | 3614   | 0.027638 | 0.61  |
| 217968_at   | tumor suppressing subtransferable candidate 1                               | TSSC1         | chr2p25.2        | Hs.4992   | 7260   | 0.046970 | 0.60  |
| 221767_x_at | high density lipoprotein binding protein (vigilin)                          | HDLBP         | chr2q37          | Hs.471851 | 3069   | 0.023349 | 0.60  |
| 231553_s_at | Microtubule associated monooxygenase, calponin and LIM domain containi      | MICAL3        | chr22q11.21      | Hs.528024 | 57553  | 0.030928 | 0.60  |
| 233238_s_at | CDNA FLJ10720 fis, clone NT2RP3001116                                       |               |                  | Hs.549665 |        | 0.010415 | 0.60  |
| 227337_at   | ankyrin repeat domain 37                                                    | ANKRD37       | chr4q35.1        | Hs.508154 | 353322 | 0.030165 | 0.60  |
| 219165_at   | PDZ and LIM domain 2 (mystique)                                             | PDLIM2        | chr8p21.2        | Hs.550527 | 64236  | 0.009323 | 0.60  |
| 78495_at    | hypothetical protein DKFZp762P2111                                          | DKFZp762P2111 | chr7q36.1        |           | 55537  | 0.042627 | 0.60  |
| 232794_at   | Hypothetical protein LOC153682                                              | LOC153682     | chr5p13.1        | Hs.165175 | 153682 | 0.026904 | 0.60  |
| 217231_s_at | microtubule associated serine/threonine kinase 1                            | MAST1         | chr19p13.2       | Hs.227489 | 22983  | 0.027843 | 0.60  |
| 214035_x_at | LOC399491 protein                                                           | LOC399491     | chr16p13.1       |           | 399491 | 0.010017 | 0.60  |
| 217795_s_at | transmembrane protein 43                                                    | TMEM43        | chr3p25.1        | Hs.517817 | 79188  | 0.007279 | 0.59  |
| 209295_at   | tumor necrosis factor receptor superfamily, member 10b                      | TNFRSF10B     | chr8p22-p21      | Hs.521456 | 8795   | 0.016815 | 0.59  |
| 1553612_at  |                                                                             |               |                  |           |        | 0.041493 | 0.59  |
| 221810_at   | RAB15, member RAS oncogene family                                           | RAB15         | chr14q23.3       | Hs.512492 | 376267 | 0.025806 | 0.59  |
| 219188_s_at | LRP16 protein                                                               | LRP16         | chr11q11         | Hs.502814 | 28992  | 0.009000 | 0.59  |
| 221708_s_at | smooth muscle cell associated protein-1 /// smooth muscle cell associat     | SMAP-1        | chr15q26.1       | Hs.389461 | 55898  | 0.010038 | 0.59  |
| 228124_at   | chromosome 20 open reading frame 22                                         | C20orf22      | chr20p11.21      | Hs.441550 | 26090  | 0.018353 | 0.59  |
| 236677_at   | neuroglobin                                                                 | NGB           | chr14q24         | Hs.274363 | 58157  | 0.044436 | 0.59  |
| 222250_s_at | DKFZP434B168 protein                                                        | DKFZP434B168  | chr1p36.13-q42.3 | Hs.369285 | 25896  | 0.031361 | 0.59  |
| 226415_at   | KIAA1576 protein                                                            | KIAA1576      | chr16q23.1       | Hs.461405 | 57687  | 0.005909 | 0.59  |
| 208749_x_at | flotillin 1                                                                 | FLOT1         | chr6p21.3        | Hs.179986 | 10211  | 0.004379 | 0.59  |
| 224505_s_at | phospholipase C, delta 4 /// phospholipase C, delta 4                       | PLCD4         | chr2q35          | Hs.549218 | 84812  | 0.013444 | 0.59  |
| 207618_s_at | BCS1-like (yeast)                                                           | BCS1L         | chr2q33          | Hs.471401 | 617    | 0.047004 | 0.59  |
| 213191_at   | TIR domain containing adaptor inducing interferon-beta                      | TRIF          | chr19p13.3       | Hs.29344  | 148022 | 0.010253 | 0.59  |
| 238594_x_at | Dual specificity phosphatase 8                                              | DUSP8         | chr11p15.5       | Hs.41688  | 1850   | 0.019954 | 0.59  |
| 206583_at   | zinc finger protein 673                                                     | ZNF673        | chrXp11.3        | Hs.444269 | 55634  | 0.002318 | 0.59  |
| 226043_at   | G-protein signalling modulator 1 (AGS3-like, C. elegans)                    | GPSM1         | chr9q34.3        | Hs.239370 | 26086  | 0.017787 | 0.59  |
| 228971_at   |                                                                             |               |                  |           |        | 0.038981 | 0.59  |
| 36129_at    | RUN and TBC1 domain containing 1                                            | RUTBC1        | chr17p13.3       | Hs.513861 | 9905   | 0.010976 | 0.58  |
| 232113_at   | Hypothetical gene supported by BX647608                                     |               | chr11q24.1       | Hs.411391 | 399959 | 0.036249 | 0.58  |
| 230864_at   | hypothetical protein MGC42105                                               | MGC42105      | chr5p12          | Hs.25845  | 167359 | 0.031121 | 0.58  |
| 203117_s_at | ubiquitin specific protease 52                                              | USP52         | chr12q13.2-q13.3 | Hs.273397 | 9924   | 0.039026 | 0.58  |
| 243209_at   | potassium voltage-gated channel, KQT-like subfamily, member 4               | KCNQ4         | chr1p34          | Hs.473058 | 9132   | 0.028960 | 0.58  |
| 209429_x_at | eukaryotic translation initiation factor 2B, subunit 4 delta, 67kDa         | EIF2B4        | chr2p23.3        | Hs.169474 | 8890   | 0.034292 | 0.58  |
| 213088_s_at | DnaJ (Hsp40) homolog, subfamily C, member 9                                 | DNAJC9        | chr10q22.2       | Hs.523037 | 23234  | 0.021036 | 0.58  |
| 242972_at   | CDNA FLJ42357 fis, clone UTERU2022773                                       |               |                  | Hs.547723 |        | 0.035324 | 0.58  |
| 225598_at   | KIAA1126 protein                                                            | KIAA1126      | chr8q24.3        | Hs.372492 | 57210  | 0.026984 | 0.58  |
| 209895_at   | protein tyrosine phosphatase, non-receptor type 11 (Noonan syndrome         | PTPN11        | chr12q24         | Hs.506852 | 5781   | 0.031578 | -0.58 |
| 221268_s_at | sphingosine-1-phosphate phosphatase 1 /// sphingosine-1-phosphate ph        | SGPP1         | chr14q23.2       | Hs.24678  | 81537  | 0.012990 | -0.58 |
| 218191_s_at | chromosome 6 open reading frame 209                                         | C6orf209      | chr6q13          | Hs.271643 | 55788  | 0.018143 | -0.59 |
| 237983_at   |                                                                             |               |                  |           |        | 0.014164 | -0.59 |
| 203883_s_at | RAB11 family interacting protein 2 (class I)                                | RAB11FIP2     | chr10q26.11      | Hs.173656 | 22841  | 0.034932 | -0.59 |
| 201830_s_at | neuroepithelial cell transforming gene 1                                    | NET1          | chr10p15         | Hs.25155  | 10276  | 0.028566 | -0.59 |
| 206233_at   | UDP-Gal:betaGlcNAc beta 1,4-galactosyltransferase, polypeptide 6            | B4GALT6       | chr18q11         | Hs.464848 | 9331   | 0.022823 | -0.59 |
| 227624_at   | KIAA1546 protein                                                            | KIAA1546      | chr4q24          | Hs.531250 | 57667  | 0.034764 | -0.59 |
| 243401_at   | Formin-like 2                                                               | FMNL2         | chr2q23.3        | Hs.149566 | 114793 | 0.010828 | -0.59 |
| 205523_at   | hyaluronan and proteoglycan link protein 1                                  | HAPLN1        | chr5q14.3        | Hs.2799   | 1404   | 0.040638 | -0.60 |
| 235164_at   | zinc finger protein 25 (KOX 19)                                             | ZNF25         | chr10p11.21      | Hs.499429 | 219749 | 0.034156 | -0.60 |
| 223943_s_at |                                                                             |               |                  |           |        | 0.025556 | -0.60 |
| 203100_s_at | chromodomain protein, Y-like                                                | CDYL          | chr6p25.1        | Hs.269092 | 9425   | 0.037659 | -0.60 |
| 223204_at   | hypothetical protein DKFZp434L142                                           | DKFZp434L142  | chr4q32.1        | Hs.323583 | 51313  | 0.045595 | -0.60 |
| 217717_s_at | tyrosine 3-monooxygenase/tryptophan 5-monooxygenase activation pro          | YWHAZ         | chr20q13.1       | Hs.279920 | 7529   | 0.044820 | -0.60 |
| 206941_x_at | sema domain, immunoglobulin domain (Ig), short basic domain, secreted       | SEMA3E        | chr7q21.11       | Hs.528721 | 9723   | 0.024731 | -0.60 |
| 241407_at   | CDNA FLJ11682 fis, clone HEMBA1004880                                       |               |                  | Hs.191828 |        | 0.015549 | -0.60 |
| 212908_at   | KIAA0962 protein                                                            | KIAA0962      | chr1p36.1        | Hs.549123 | 23341  | 0.045626 | -0.60 |
| 208811_s_at | DnaJ (Hsp40) homolog, subfamily B, member 6                                 | DNAB6         | chr7q36.3        | Hs.490745 | 10049  | 0.037363 | -0.61 |
| 215073_s_at | nuclear receptor subfamily 2, group F, member 2                             | NR2F2         | chr15q26         | Hs.347991 | 7026   | 0.030823 | -0.61 |
| 212417_at   | secretory carrier membrane protein 1                                        | SCAMP1        | chr5q13.3-q14.1  | Hs.482587 | 9522   | 0.024075 | -0.61 |
| 200638_s_at | tyrosine 3-monooxygenase/tryptophan 5-monooxygenase activation pro          | YWHAZ         | chr8q23.1        | Hs.492407 | 7534   | 0.043445 | -0.61 |
| 224786_at   | short coiled-coil protein                                                   | SCOC          | chr4q31.1        | Hs.480815 | 60592  | 0.027179 | -0.61 |
| 202206_at   | ADP-ribosylation factor-like 7                                              | ARL7          | chr2q37.1        | Hs.111554 | 10123  | 0.029295 | -0.61 |
| 1552306_at  | asparagine-linked glycosylation 10 homolog (yeast, alpha-1,2-glucosyltra    | ALG10         | chr12p11.1       | Hs.102971 | 84920  | 0.010242 | -0.61 |
| 212262_at   | quaking homolog, KH domain RNA binding (mouse)                              | QKI           | chr6q26-27       | Hs.510324 | 9444   | 0.016300 | -0.61 |
| 212306_at   | cytoplasmic linker associated protein 2                                     | CLASP2        | chr3p23          | Hs.108614 | 23122  | 0.010693 | -0.62 |
| 217322_x_at |                                                                             |               |                  |           |        | 0.022654 | -0.62 |
| 221428_s_at | transducin (beta)-like 1X-linked receptor 1 /// transducin (beta)-like 1X-l | TBL1XR1       | chr3q26.32       | Hs.438970 | 79718  | 0.041726 | -0.62 |



|                         |                                                                                 |           |                   |           |             |  |          |       |
|-------------------------|---------------------------------------------------------------------------------|-----------|-------------------|-----------|-------------|--|----------|-------|
| 202919_at               | preimplantation protein 3                                                       | PREI3     | chr2q33.1         | Hs.205173 | 25843       |  | 0.016497 | -0.62 |
| 228214_at               | Transcribed locus                                                               |           |                   | Hs.34145  |             |  | 0.014167 | -0.63 |
| 235757_at               | Chromosome 10 open reading frame 18                                             | C10orf18  | chr10p15.1        | Hs.432548 | 54906       |  | 0.016807 | -0.63 |
| 229083_at               | Heterogeneous nuclear ribonucleoprotein A0                                      | HNRPA0    | chr5q31           | Hs.96996  | 10949       |  | 0.045030 | -0.63 |
| 206376_at               | solute carrier family 6, member 15                                              | SLC6A15   | chr12q21.3        | Hs.44424  | 55117       |  | 0.045481 | -0.63 |
| 211703_s_at             | beta-amyloid binding protein precursor /// beta-amyloid binding protein         | BBP       | chr1p31.3         | Hs.276876 | 83941       |  | 0.021537 | -0.64 |
| 224581_s_at             | Nuclear ubiquitous casein kinase and cyclin-dependent kinase substrate          | NUCKS     | chr1q32.1         | Hs.213061 | 64710       |  | 0.019272 | -0.64 |
| 232512_at               |                                                                                 |           |                   |           |             |  | 0.015085 | -0.64 |
| 203998_s_at             | synaptotagmin I                                                                 | SYT1      | chr12cen-q21      | Hs.310545 | 6857        |  | 0.046172 | -0.64 |
| 200607_s_at             | RAD21 homolog (S. pombe)                                                        | RAD21     | chr8q24           | Hs.81848  | 5885        |  | 0.046834 | -0.64 |
| 209071_s_at             | regulator of G-protein signalling 5                                             | RG55      | chr1q23.1         | Hs.24950  | 8490        |  | 0.000981 | -0.64 |
| 235067_at               | muskelin 1, intracellular mediator containing kelch motifs                      | MKLN1     | chr7q32           | Hs.44693  | 4289        |  | 0.034494 | -0.64 |
| 225198_at               | VAMP (vesicle-associated membrane protein)-associated protein A, 33kD           | VAPA      | chr18p11.22       | Hs.165195 | 9218        |  | 0.046970 | -0.64 |
| 204011_at               | sprouty homolog 2 (Drosophila)                                                  | SPRY2     | chr13q31.1        | Hs.18676  | 10253       |  | 0.021518 | -0.64 |
| 215303_at               | Clones 24632 and 24634 mRNA sequence                                            |           |                   | Hs.129997 |             |  | 0.030348 | -0.65 |
| 225821_s_at             | KIAA1327 protein                                                                | KIAA1327  | chr4p16.1         | Hs.106204 | 57219       |  | 0.000511 | -0.65 |
| 235450_at               | F-box and leucine-rich repeat protein 4                                         | FBXL4     | chr6q16.1-q16.3   | Hs.536850 | 26235       |  | 0.018636 | -0.65 |
| 201089_s_at             | ATPase, H+ transporting, lysosomal 56/58kDa, V1 subunit B, isoform 2            | ATP6V1B2  | chr8p22-p21       | Hs.295917 | 526         |  | 0.049270 | -0.65 |
| 236700_at               | eukaryotic translation initiation factor 3, subunit 8, 110kDa                   | EIF3S8    | chr16p11.2        | Hs.192425 | 8663        |  | 0.027351 | -0.65 |
| 244181_at               | Phosphoinositide-3-kinase, regulatory subunit 1 (p85 alpha)                     | PIK3R1    | chr5q13.1         | Hs.132225 | 5295        |  | 0.047658 | -0.65 |
| 222835_at               | Hypothetical protein FLJ13710                                                   | FLJ13710  | chr15q23          | Hs.387057 | 79875       |  | 0.020899 | -0.65 |
| 201238_s_at             | capping protein (actin filament) muscle Z-line, alpha 2                         | CAPZA2    | chr7q31.2-q31.3   | Hs.446123 | 830         |  | 0.046469 | -0.65 |
| 242134_at               | Transcribed locus                                                               |           |                   | Hs.553068 |             |  | 0.026637 | -0.65 |
| 214499_s_at             | BCL2-associated transcription factor 1                                          | BCLAF1    | chr6q22-q23       | Hs.486542 | 9774        |  | 0.015950 | -0.65 |
| 1561615_s_at            | solute carrier family 8 (sodium/calcium exchanger), member 1                    | SLC8A1    | chr2p23-p22       | Hs.468274 | 6546        |  | 0.044271 | -0.66 |
| 205801_s_at             | RAS guanyl releasing protein 3 (calcium and DAG-regulated)                      | RASGRP3   | chr2p25.1-p24.1   | Hs.143674 | 25780       |  | 0.011524 | -0.66 |
| 238494_at               | TNF receptor-associated factor 3 interacting protein 1                          | TRAF3IP1  | chr2q37.1         | Hs.43086  | 26146       |  | 0.018316 | -0.66 |
| 229138_at               | poly (ADP-ribose) polymerase family, member 11                                  | PARP11    | chr12p13.3        | Hs.504538 | 57097       |  | 0.001227 | -0.66 |
| 204182_s_at             | zinc finger protein 297B                                                        | ZNF297B   | chr9p24.1-q22.33  | Hs.355581 | 23099       |  | 0.025694 | -0.67 |
| 207152_at               | neurotrophic tyrosine kinase, receptor, type 2                                  | NTRK2     | chr9q22.1         | Hs.494312 | 4915        |  | 0.030423 | -0.67 |
| 1562573_at              | Cytochrome P450, family 17, subfamily A, polypeptide 1                          | CYP17A1   | chr10q24.3        | Hs.438016 | 1586        |  | 0.029114 | -0.67 |
| 221895_at               | motile sperm domain containing 2                                                | MOSPD2    | chrXp22.2         | Hs.190043 | 158747      |  | 0.019554 | -0.68 |
| 230291_s_at             | Nuclear factor I/B                                                              | NFIB      | chr9p24.1         | Hs.370359 | 4781        |  | 0.032424 | -0.69 |
| 202137_s_at             | zinc finger, MYND domain containing 11                                          | ZMYND11   | chr10p14          | Hs.292265 | 10771       |  | 0.023652 | -0.69 |
| 238856_s_at             | Pantothenate kinase 2 (Hallervorden-Spatz syndrome)                             | PANK2     | chr2p13           | Hs.516859 | 80025       |  | 0.000766 | -0.69 |
| 209243_s_at             | paternally expressed 3                                                          | PEG3      | chr19q13.4        | Hs.201776 | 5178        |  | 0.019702 | -0.69 |
| 242691_at               | CDNA FLJ41369 fis, clone BRCAN2006117                                           |           |                   | Hs.445715 |             |  | 0.030792 | -0.69 |
| 1565601_at              | Protocadherin 9                                                                 | PCDH9     | chr13q14.3-q21.1  | Hs.407643 | 5101        |  | 0.032268 | -0.69 |
| 212244_at               | glutamate receptor, ionotropic, N-methyl D-aspartate-like 1A                    | GRINL1A   | chr15q22.1        | Hs.437256 | 81488       |  | 0.008505 | -0.69 |
| AFFX-HUMRGE/M10098_5_at |                                                                                 |           |                   |           |             |  | 0.042900 | -0.69 |
| 211931_s_at             | heterogeneous nuclear ribonucleoprotein A3 pseudogene 1 /// heteroge            | HNRPA3P1  | chr10q11.21 /// c | Hs.524276 | 10151 /// c |  | 0.015313 | -0.70 |
| 231898_x_at             | SOX2 overlapping transcript (non-coding RNA)                                    | SOX2OT    | chr3q26.3-q27     | Hs.546551 | 347689      |  | 0.021798 | -0.70 |
| 242968_at               |                                                                                 |           |                   |           |             |  | 0.028194 | -0.70 |
| 209301_at               | carbonic anhydrase II                                                           | CA2       | chr8q22           | Hs.155097 | 760         |  | 0.001531 | -0.71 |
| 244331_at               | Splicing factor proline/glutamine rich (polypyrimidine tract binding prote      | SFPQ      | chr1p34.3         | Hs.355934 | 6421        |  | 0.015926 | -0.71 |
| 203527_s_at             | adenomatosis polyposis coli                                                     | APC       | chr5q21-q22       | Hs.158932 | 324         |  | 0.017910 | -0.71 |
| 228909_at               | Chromosome 21 open reading frame 86                                             | C21orf86  | chr21q22.3        | Hs.11637  | 257103      |  | 0.038177 | -0.71 |
| 237556_at               | Similar to BTG3 associated nuclear protein isoform b; BANP homolog; SMAR1 homol | SMAR1     | chr16p11.2        | Hs.460515 | 440352      |  | 0.004508 | -0.71 |
| 225666_at               | hypothetical protein FLJ14624                                                   | FLJ14624  | chr13q32.3        | Hs.190983 | 84899       |  | 0.015973 | -0.72 |
| 235222_x_at             | baculoviral IAP repeat-containing 4                                             | BIRC4     | chrXq25           | Hs.356076 | 331         |  | 0.015908 | -0.72 |
| 1558279_a_at            | Follicular lymphoma variant translocation 1                                     | FVT1      | chr18q21.3        | Hs.74050  | 2531        |  | 0.013121 | -0.72 |
| 235885_at               | purinergic receptor P2Y, G-protein coupled, 12                                  | P2RY12    | chr3q24-q25       | Hs.532933 | 64805       |  | 0.043782 | -0.72 |
| 1555247_a_at            | Rap guanine nucleotide exchange factor (GEF) 6                                  | RAPGEF6   | chr5q23.3         |           | 51735       |  | 0.016193 | -0.73 |
| 212461_at               |                                                                                 |           |                   |           |             |  | 0.046922 | -0.73 |
| 230135_at               | CDNA FLJ42405 fis, clone ASTRO3000474                                           |           |                   | Hs.548089 |             |  | 0.030251 | -0.73 |
| 209006_s_at             | NPD014 protein                                                                  | NPD014    | chr1p36.13-p35.1  | Hs.259412 | 57035       |  | 0.034194 | -0.73 |
| 242206_at               | similar to Zinc finger protein 58 (Zfp-58) (Zinc finger protein Mfg-1)          | LOC340246 | chr7q11.21        | Hs.434984 | 340246      |  | 0.016437 | -0.73 |
| 225571_at               | Leukemia inhibitory factor receptor                                             | LIFR      | chr5p13-p12       | Hs.133421 | 3977        |  | 0.029754 | -0.74 |
| 222422_s_at             | Nedd4 family interacting protein 1                                              | NDFIP1    | chr5q31.3         | Hs.9788   | 80762       |  | 0.034349 | -0.74 |
| 1562686_at              | CDNA FLJ20158 fis, clone COL08935                                               |           |                   | Hs.375659 |             |  | 0.011948 | -0.74 |
| 227148_at               |                                                                                 |           |                   |           |             |  | 0.031090 | -0.75 |
| 223925_s_at             |                                                                                 |           |                   |           |             |  | 0.010069 | -0.75 |
| 1558414_at              | chromosome 9 open reading frame 4                                               | C9orf4    | chr9q31           | Hs.347537 | 23732       |  | 0.020893 | -0.75 |
| 1558372_at              | CDNA FLJ34038 fis, clone FCBBF2005645                                           |           |                   | Hs.530150 |             |  | 0.040078 | -0.76 |
| 219557_s_at             | nuclear receptor interacting protein 3                                          | NRIP3     | chr11p15.3        | Hs.523467 | 56675       |  | 0.021456 | -0.76 |
| 238137_at               | Pleiotropic regulator 1 (PRL1 homolog, Arabidopsis)                             | PLRG1     | chr4q31.2-q32.1   | Hs.249996 | 5356        |  | 0.018375 | -0.76 |
| 217893_s_at             | hypothetical protein FLJ12666                                                   | FLJ12666  | chr1p34.3         | Hs.293563 | 79647       |  | 0.048528 | -0.76 |
| 225539_at               | zinc finger protein 295                                                         | ZNF295    | chr21q22.3        | Hs.434947 | 49854       |  | 0.036119 | -0.76 |
| 1555889_a_at            | cartilage associated protein                                                    | CRTAP     | chr3p22.3         | Hs.517888 | 10491       |  | 0.045547 | -0.77 |
| 208925_at               | chromosome 3 open reading frame 4                                               | C3orf4    | chr3p11-q11       | Hs.107393 | 56650       |  | 0.033171 | -0.77 |
| 223242_s_at             | hypothetical protein ET                                                         | ET        | chr17q25          | Hs.464166 | 79157       |  | 0.000577 | -0.77 |
| 219300_s_at             | contactin associated protein-like 2                                             | CNTNAP2   | chr7q35-q36       | Hs.446192 | 26047       |  | 0.023366 | -0.77 |
| 200605_s_at             | protein kinase, cAMP-dependent, regulatory, type I, alpha (tissue specific)     | PRKAR1A   | chr17q23-q24      | Hs.280342 | 5573        |  | 0.027278 | -0.77 |
| 231167_at               | Transcribed locus                                                               |           |                   | Hs.531813 |             |  | 0.021488 | -0.78 |

|              |                                                                            |           |                  |           |        |  |          |       |
|--------------|----------------------------------------------------------------------------|-----------|------------------|-----------|--------|--|----------|-------|
| 223661_at    |                                                                            |           |                  |           |        |  | 0.043540 | -0.78 |
| 238929_at    | Splicing factor, arginine/serine-rich, 46kD                                | SRP46     | chr11q22         | Hs.476680 | 10929  |  | 0.011913 | -0.78 |
| 210561_s_at  | WD repeat and SOCS box-containing 1                                        | WSB1      | chr17q11.1       | Hs.446017 | 26118  |  | 0.027749 | -0.79 |
| 233437_at    | gamma-aminobutyric acid (GABA) A receptor, alpha 4                         | GABRA4    | chr4p12          | Hs.248112 | 2557   |  | 0.037609 | -0.80 |
| 206794_at    | v-erb-a erythroblastic leukemia viral oncogene homolog 4 (avian)           | ERBB4     | chr2q33.3-q34    | Hs.390729 | 2066   |  | 0.006230 | -0.80 |
| 1558028_x_at | HLA complex group 11                                                       | HCG11     | chr6p21          | Hs.272939 | 493812 |  | 0.049973 | -0.80 |
| 220238_s_at  | kelch-like 7 (Drosophila)                                                  | KLHL7     | chr7p15.3        | Hs.385861 | 55975  |  | 0.020818 | -0.81 |
| 1565602_at   | Protocadherin 9                                                            | PCDH9     | chr13q14.3-q21.1 | Hs.407643 | 5101   |  | 0.022772 | -0.81 |
| 238985_at    |                                                                            |           |                  |           |        |  | 0.034746 | -0.81 |
| 203083_at    | thrombospondin 2                                                           | THBS2     | chr6q27          | Hs.371147 | 7058   |  | 0.029538 | -0.81 |
| 206135_at    | suppression of tumorigenicity 18 (breast carcinoma) (zinc finger protein)  | ST18      | chr8q11.23       | Hs.549092 | 9705   |  | 0.017369 | -0.82 |
| 225308_s_at  | TPR domain, ankyrin-repeat and coiled-coil-containing                      | TANC      | chr2q24.2        | Hs.61590  | 85461  |  | 0.024029 | -0.82 |
| 205822_s_at  | 3-hydroxy-3-methylglutaryl-Coenzyme A synthase 1 (soluble)                 | HMGCS1    | chr5p14-p13      | Hs.397729 | 3157   |  | 0.043160 | -0.82 |
| 234000_s_at  | butyrate-induced transcript 1                                              | HSPC121   | chr15q22.2       | Hs.512973 | 51495  |  | 0.019604 | -0.82 |
| 219732_at    | plasticity related gene 3                                                  | PRG-3     | chr9q31.1        | Hs.382683 | 54886  |  | 0.041770 | -0.82 |
| 237741_at    | Hypothetical protein FLJ10618                                              | FLJ10618  | chr3q23          | Hs.144130 | 55186  |  | 0.010451 | -0.83 |
| 201668_x_at  | myristoylated alanine-rich protein kinase C substrate                      | MARCKS    | chr6q22.2        | Hs.519909 | 4082   |  | 0.025983 | -0.83 |
| 202602_s_at  | HIV TAT specific factor 1                                                  | HTATSF1   | chrXq26.1-q27.2  | Hs.204475 | 27336  |  | 0.046456 | -0.83 |
| 229327_s_at  | V-maf musculoaponeurotic fibrosarcoma oncogene homolog (avian)             | MAF       | chr16q22-q23     | Hs.134859 | 4094   |  | 0.032536 | -0.84 |
| 211547_s_at  | platelet-activating factor acetylhydrolase, isoform Ib, alpha subunit 45kD | PAFAH1B1  | chr17p13.3       | Hs.77318  | 5048   |  | 0.029163 | -0.84 |
| 222608_s_at  | anillin, actin binding protein (scraps homolog, Drosophila)                | ANLN      | chr7p15-p14      | Hs.62180  | 54443  |  | 0.011042 | -0.85 |
| 213033_s_at  | Nuclear factor I/B                                                         | NFIB      | chr9p24.1        | Hs.370359 | 4781   |  | 0.007599 | -0.87 |
| 209896_s_at  | protein tyrosine phosphatase, non-receptor type 11 (Noonan syndrome)       | PTPN11    | chr12q24         | Hs.506852 | 5781   |  | 0.027654 | -0.87 |
| 211480_s_at  | solute carrier organic anion transporter family, member 1A2                | SLCO1A2   | chr12p12         | Hs.46440  | 6579   |  | 0.000018 | -0.88 |
| 209735_at    | ATP-binding cassette, sub-family G (WHITE), member 2                       | ABCG2     | chr4q22          | Hs.480218 | 9429   |  | 0.011466 | -0.88 |
| 244439_at    | sprouty-related, EVH1 domain containing 1                                  | SPRED1    | chr15q14         | Hs.525781 | 161742 |  | 0.042872 | -0.88 |
| 210839_s_at  | ectonucleotide pyrophosphatase/phosphodiesterase 2 (autotaxin)             | ENPP2     | chr8q24.1        | Hs.190977 | 5168   |  | 0.027035 | -0.90 |
| 222111_at    | Hypothetical protein KIAA1164                                              | KIAA1164  | chr15q21.3       | Hs.368548 | 54629  |  | 0.012408 | -0.91 |
| 1557953_at   | zinc finger with KRAB and SCAN domains 1                                   | ZKSCAN1   | chr7q21.3-q22.1  | Hs.423725 | 7586   |  | 0.039936 | -0.91 |
| 213069_at    | HEG homolog 1 (zebrafish)                                                  | HEG       | chr3q21.2        | Hs.477420 | 57493  |  | 0.033453 | -0.91 |
| 222850_s_at  | hypothetical protein FLJ14281                                              | FLJ14281  | chr4q23          | Hs.512743 | 79982  |  | 0.041607 | -0.91 |
| 228485_s_at  | CDW92 antigen                                                              | CDW92     | chr9q31.2        | Hs.494700 | 23446  |  | 0.009019 | -0.92 |
| 201485_s_at  | reticulocalbin 2, EF-hand calcium binding domain                           | RCN2      | chr15q23         | Hs.79088  | 5955   |  | 0.049869 | -0.92 |
| 209631_s_at  | G protein-coupled receptor 37 (endothelin receptor type B-like)            | GPR37     | chr7q31          | Hs.406094 | 2861   |  | 0.010085 | -0.92 |
| 217582_at    |                                                                            |           |                  |           |        |  | 0.041342 | -0.93 |
| 241403_at    | CDC-like kinase 4                                                          | CLK4      | chr5q35          | Hs.406557 | 57396  |  | 0.006727 | -0.94 |
| 222404_x_at  | butyrate-induced transcript 1                                              | HSPC121   | chr15q22.2       | Hs.512973 | 51495  |  | 0.019458 | -0.95 |
| 203758_at    | cathepsin O                                                                | CTSO      | chr4q31-q32      | Hs.75262  | 1519   |  | 0.041978 | -0.97 |
| 203300_x_at  | adaptor-related protein complex 1, sigma 2 subunit                         | AP1S2     | chrXp22.2        | Hs.121592 | 8905   |  | 0.005445 | -0.98 |
| 221859_at    | synaptotagmin XIII                                                         | SYT13     | chr11p12-p11     | Hs.436643 | 57586  |  | 0.020540 | -0.99 |
| 214586_at    | G protein-coupled receptor 37 (endothelin receptor type B-like)            | GPR37     | chr7q31          | Hs.406094 | 2861   |  | 0.030959 | -1.03 |
| 226533_at    |                                                                            |           |                  |           |        |  | 0.008223 | -1.08 |
| 228956_at    | UDP glycosyltransferase 8 (UDP-galactose ceramide galactosyltransferase)   | UGT8      | chr4q26          | Hs.144197 | 7368   |  | 0.006779 | -1.11 |
| 1559129_a_at | hypothetical protein LOC158257                                             | LOC158257 | chr9q22.32       | Hs.213065 | 158257 |  | 0.017429 | -1.14 |
| 231911_at    | KIAA1189                                                                   | KIAA1189  | chr2q24.1        | Hs.443894 | 57471  |  | 0.033621 | -1.17 |
| 228335_at    | claudin 11 (oligodendrocyte transmembrane protein)                         | CLDN11    | chr3q26.2-q26.3  | Hs.31595  | 5010   |  | 0.039478 | -1.24 |
| 241685_x_at  | Transcribed locus                                                          |           |                  | Hs.200938 |        |  | 0.046373 | -1.24 |
| 209392_at    | ectonucleotide pyrophosphatase/phosphodiesterase 2 (autotaxin)             | ENPP2     | chr8q24.1        | Hs.190977 | 5168   |  | 0.015765 | -1.26 |
| 203348_s_at  | ets variant gene 5 (ets-related molecule)                                  | ETV5      | chr3q28          | Hs.43697  | 2119   |  | 0.018585 | -1.43 |
| 210198_s_at  | proteolipid protein 1 (Pelizaeus-Merzbacher disease, spastic paraplegia 2) | PLP1      | chrXq22          | Hs.1787   | 5354   |  | 0.006224 | -1.45 |
