# Supplementary material
Source: PubMed Central journal article supplement (PMC2823856)
Supplement: NIHMS167684-supplement-02.pdf [file NIHMS167684-supplement-02.pdf]

| Probe        | Gene name                                                               | Symbol      | Location         | Unigene   | LocusLink  | SCZ-CNT IG pval | SCZ-CNT IG ALR |
|--------------|-------------------------------------------------------------------------|-------------|------------------|-----------|------------|-----------------|----------------|
| 209395_at    | chitinase 3-like 1 (cartilage glycoprotein-39)                          | CHI3L1      | chr1q32.1        | Hs.382202 | 1116       | 0.025688        | 1.44           |
| 209396_s_at  | chitinase 3-like 1 (cartilage glycoprotein-39)                          | CHI3L1      | chr1q32.1        | Hs.382202 | 1116       | 0.011407        | 1.38           |
| 207574_s_at  | growth arrest and DNA-damage-inducible, beta                            | GADD45B     | chr19p13.3       | Hs.110571 | 4616       | 0.039501        | 1.37           |
| 229259_at    | glial fibrillary acidic protein                                         | GFAP        | chr17q21         | Hs.514227 | 2670       | 0.034990        | 1.33           |
| 201613_s_at  | adaptor-related protein complex 1, gamma 2 subunit                      | AP1G2       | chr14q11.2       | Hs.343244 | 8906       | 0.006383        | 1.33           |
| 212203_x_at  | interferon induced transmembrane protein 3 (1-8U)                       | IFITM3      | chr11p15.5       | Hs.374650 | 10410      | 0.005623        | 1.26           |
| 240083_at    |                                                                         |             |                  |           |            | 0.024525        | 1.22           |
| 1561306_s_at | stereocilin                                                             | STRC        | chr15q15.3       | Hs.550553 | 161497     | 0.006986        | 1.16           |
| 235867_at    | glutathione S-transferase M3 (brain)                                    | GSTM3       | chr1p13.3        | Hs.2006   | 2947       | 0.010845        | 1.14           |
| 210794_s_at  | maternally expressed 3                                                  | MEG3        | chr14q32         | Hs.525589 | 55384      | 0.007667        | 1.11           |
| 1552301_a_at | coronin 6                                                               | CORO6       | chr17q21.2       | Hs.143046 | 84940      | 0.041185        | 1.09           |
| 219019_at    | leucine-rich repeats and death domain containing                        | LRDD        | chr11p15.5       | Hs.552597 | 55367      | 0.018113        | 1.07           |
| 217911_s_at  | BCL2-associated athanogene 3                                            | BAG3        | chr10q25.2-q26.2 | Hs.523309 | 9531       | 0.025526        | 1.07           |
| 231392_at    | Hypothetical protein BC008326                                           | LOC89944    | chr11q25         | Hs.436178 | 89944      | 0.016314        | 1.07           |
| 214022_s_at  |                                                                         |             |                  |           |            | 0.041950        | 1.07           |
| 237870_at    | hypothetical protein LOC285771                                          | LOC285771   | chr6p25.2        | Hs.145597 | 285771     | 0.043433        | 1.04           |
| 240048_at    | Stereocilin                                                             | STRC        | chr15q15.3       | Hs.550553 | 161497     | 0.018828        | 1.03           |
| 230664_at    | hypothetical protein MGC39900                                           | MGC39900    | chrXq22.2        | Hs.496530 | 286527     | 0.001994        | 1.02           |
| 225321_s_at  | paired immunoglobulin-like type 2 receptor beta                         | PILRB       | chr7q22.1        | Hs.530084 | 29990      | 0.042260        | 0.99           |
| 1555847_a_at | hypothetical protein LOC284454                                          | LOC284454   | chr19p13.13      | Hs.436426 | 284454     | 0.009724        | 0.98           |
| 230941_at    | hypothetical LOC400988                                                  | LOC400988   | chr2q11.2        | Hs.469369 | 400988     | 0.007228        | 0.98           |
| 240174_at    | Hypothetical LOC388903                                                  |             | chr22q13.1       | Hs.474880 | 388903     | 0.008394        | 0.98           |
| 226679_at    | solute carrier family 26, member 11                                     | SLC26A11    | chr17q25.3       | Hs.4866   | 284129     | 0.002016        | 0.98           |
| 201315_x_at  | interferon induced transmembrane protein 2 (1-8D)                       | IFITM2      | chr11p15.5       | Hs.174195 | 10581      | 0.019868        | 0.97           |
| 243337_at    | FRAS1 related extracellular matrix 3                                    | FREM3       | chr4q31.21       | Hs.252714 | 166752     | 0.013947        | 0.95           |
| 201841_s_at  | heat shock 27kDa protein 1                                              | HSPB1       | chr7q11.23       | Hs.520973 | 3315       | 0.014354        | 0.95           |
| 202284_s_at  | cyclin-dependent kinase inhibitor 1A (p21, Cip1)                        | CDKN1A      | chr6p21.2        | Hs.370771 | 1026       | 0.032645        | 0.95           |
| 213428_s_at  | collagen, type VI, alpha 1                                              | COL6A1      | chr21q22.3       | Hs.474053 | 1291       | 0.031385        | 0.95           |
| 211964_at    | collagen, type IV, alpha 2                                              | COL4A2      | chr13q34         | Hs.508716 | 1284       | 0.027987        | 0.94           |
| 240402_at    |                                                                         |             |                  |           |            | 0.047957        | 0.93           |
| 209304_x_at  | growth arrest and DNA-damage-inducible, beta                            | GADD45B     | chr19p13.3       | Hs.110571 | 4616       | 0.029051        | 0.93           |
| 238333_s_at  | GTP binding protein                                                     | Sprn        | chr10q26.3       | Hs.501578 | 92170      | 0.049532        | 0.93           |
| 227543_at    | AYP1 protein                                                            | AYP1        | chr11q13.1       | Hs.397010 | 84153      | 0.003628        | 0.92           |
| 1560089_at   | hypothetical protein LOC286208                                          | LOC286208   | chr9q34.11       | Hs.533252 | 286208     | 0.000260        | 0.91           |
| 203973_s_at  | CCAAT/enhancer binding protein (C/EBP), delta                           | CEBPD       | chr8p11.2-p11.1  | Hs.440829 | 1052       | 0.012942        | 0.91           |
| 91617_at     | DiGeorge syndrome critical region gene 8                                | DGCR8       | chr22q11.2       | Hs.533019 | 54487      | 0.020127        | 0.90           |
| 228124_at    | chromosome 20 open reading frame 22                                     | C20orf22    | chr20p11.21      | Hs.441550 | 26090      | 0.015525        | 0.89           |
| 1553993_s_at | mediator of RNA polymerase II transcription, subunit 25 homolog (yeast) | MED25       | chr19q13.3       | Hs.467128 | 81857      | 0.049947        | 0.88           |
| 236677_at    | neuroglobin                                                             | NGB         | chr14q24         | Hs.274363 | 58157      | 0.034290        | 0.88           |
| 210069_at    | choline kinase beta /// carnitine palmitoyltransferase 1B (muscle)      | CHKB /// C  | chr22q13.33      | Hs.439777 | 1120 /// 1 | 0.025336        | 0.88           |
| 230417_at    | UDP-N-acetyl-alpha-D-galactosamine:polypeptide N-acetylgalactosamin     | GALNTL1     | chr14q24.1       | Hs.21035  | 57452      | 0.016818        | 0.88           |
| 212556_at    | scribbled homolog (Drosophila)                                          | SCRIB       | chr8q24.3        | Hs.436329 | 23513      | 0.048969        | 0.87           |
| 221501_x_at  | hypothetical protein LOC339047                                          | LOC339047   | chr16p12.3       | Hs.513391 | 339047     | 0.004180        | 0.87           |
| 228111_s_at  | heat shock regulated 1                                                  | XLHSRF-1    | chr3p21.31       | Hs.9740   | 25981      | 0.040957        | 0.87           |
| 204538_x_at  | nuclear pore complex interacting protein /// hypothetical protein LOC3  | NPIP /// LC | chr16p13-p11 /// | Hs.528782 | 339047 /// | 0.002060        | 0.87           |
| 212185_x_at  | metallothionein 2A                                                      | MT2A        | chr16q13         | Hs.418241 | 4502       | 0.031322        | 0.87           |
| 204326_x_at  | metallothionein 1X                                                      | MT1X        | chr16q13         | Hs.374950 | 4501       | 0.021988        | 0.86           |
| 1556762_a_at | Methionine sulfoxide reductase A                                        | MSRA        | chr8p23.1        | Hs.490981 | 4482       | 0.046057        | 0.86           |
| 40569_at     | zinc finger protein 42 (myeloid-specific retinoic acid-responsive)      | ZNF42       | chr19q13.2-q13.4 | Hs.399810 | 7593       | 0.011935        | 0.85           |
| 214035_x_at  | LOC399491 protein                                                       | LOC399491   | chr16p13.1       |           | 399491     | 0.003100        | 0.85           |
| 214870_x_at  | nuclear pore complex interacting protein /// hypothetical protein LOC3  | NPIP /// LC | chr16p13-p11 /// | Hs.528782 | 339047 /// | 0.003126        | 0.85           |
| 243061_at    | hypothetical gene supported by BX248251                                 | LOC387974   | chr14q12         | Hs.92556  | 387978     | 0.042754        | 0.85           |
| 230418_s_at  | UDP-N-acetyl-alpha-D-galactosamine:polypeptide N-acetylgalactosamin     | GALNTL1     | chr14q24.1       | Hs.21035  | 57452      | 0.007211        | 0.85           |
| 206204_at    | growth factor receptor-bound protein 14                                 | GRB14       | chr2q22-q24      | Hs.411881 | 2888       | 0.031659        | 0.84           |
| 211996_s_at  | PI-3-kinase-related kinase SMG-1-like                                   | KIAA0220    | chr16p12.3       | Hs.528462 | 283846     | 0.014660        | 0.84           |
| 209467_s_at  | MAP kinase interacting serine/threonine kinase 1                        | MKINK1      | chr1p33          | Hs.371594 | 8569       | 0.010781        | 0.84           |
| 209381_x_at  | splicing factor 3a, subunit 2, 66kDa                                    | SF3A2       | chr19p13.3-p13.2 | Hs.115232 | 8175       | 0.022943        | 0.84           |
| 213900_at    | chromosome 9 open reading frame 61                                      | C9orf61     | chr9q13-q21      | Hs.118003 | 9413       | 0.016543        | 0.84           |
| 40020_at     | cadherin, EGF LAG seven-pass G-type receptor 3 (flamingo homolog, Dros  | CELSR3      | chr3p24.1-p21.2  | Hs.533070 | 1951       | 0.033804        | 0.83           |
| 37462_i_at   | splicing factor 3a, subunit 2, 66kDa                                    | SF3A2       | chr19p13.3-p13.2 | Hs.115232 | 8175       | 0.049961        | 0.82           |
| 200840_at    | lysyl-tRNA synthetase                                                   | KARS        | chr16q23-q24     | Hs.3100   | 3735       | 0.043282        | 0.82           |
| 218552_at    | enoyl Coenzyme A hydratase domain containing 2                          | ECHDC2      | chr1p32.3        | Hs.476319 | 55268      | 0.028020        | 0.82           |
| 205428_s_at  | calbindin 2, 29kDa (calretinin)                                         | CALB2       | chr16q22.2       | Hs.106857 | 794        | 0.000149        | 0.82           |
| 225598_at    | KIAA1126 protein                                                        | KIAA1126    | chr8q24.3        | Hs.372492 | 57210      | 0.034278        | 0.81           |
| 233168_s_at  | selenoprotein O                                                         | SELO        | chr22q13.33      | Hs.365405 | 83642      | 0.019833        | 0.81           |
| 212732_at    | maternally expressed 3                                                  | MEG3        | chr14q32         | Hs.525589 | 55384      | 0.029608        | 0.81           |
| 237483_at    | Pleckstrin homology domain containing, family A member 5                | PLEKHA5     | chr12p12         | Hs.188614 | 54477      | 0.031996        | 0.81           |
| 236229_at    | Similar to Hypothetical zinc finger protein KIAA1956                    |             | chr19q13.43      | Hs.467370 | 400721     | 0.010338        | 0.81           |
| 243996_at    | Transcribed locus                                                       |             |                  | Hs.151334 |            | 0.034990        | 0.81           |
| 244358_at    |                                                                         |             |                  |           |            | 0.030896        | 0.80           |
| 206461_x_at  | metallothionein 1H                                                      | MT1H        | chr16q13         | Hs.438462 | 4496       | 0.027586        | 0.80           |
| 212360_at    | adenosine monophosphate deaminase 2 (isoform L)                         | AMPD2       | chr1p13.3        | Hs.82927  | 271        | 0.025468        | 0.79           |
| 208982_at    | Platelet/endothelial cell adhesion molecule (CD31 antigen)              | PECAM1      | chr17q23         | Hs.514412 | 5175       | 0.000647        | 0.79           |

|              |                                                                                                                                     |             |                  |           |            |          |      |
|--------------|-------------------------------------------------------------------------------------------------------------------------------------|-------------|------------------|-----------|------------|----------|------|
| 201160_s_at  | cold shock domain protein A                                                                                                         | CSDA        | chr12p13.1       | Hs.221889 | 8531       | 0.043946 | 0.79 |
| 214241_at    | NADH dehydrogenase (ubiquinone) 1 beta subcomplex, 8, 19kDa                                                                         | NDUFB8      | chr10q23.2-q23.3 | Hs.523215 | 4714       | 0.036464 | 0.79 |
| 37860_at     | zinc finger protein 337                                                                                                             | ZNF337      | chr20p11.21      | Hs.213735 | 26152      | 0.021584 | 0.79 |
| 207063_at    | chromosome Y open reading frame 14                                                                                                  | CYorf14     | chrYq11.222      | Hs.138453 | 55410      | 0.046198 | 0.78 |
| 218792_s_at  | B-box and SPRY domain containing                                                                                                    | BSPRY       | chr9q32          | Hs.494870 | 54836      | 0.008033 | 0.78 |
| 239784_at    | MRNA, chromosome 1 specific transcript KIAA0504.                                                                                    |             |                  | Hs.127406 |            | 0.010045 | 0.78 |
| 220349_s_at  | endo-beta-N-acetylglucosaminidase                                                                                                   | FLJ21865    | chr17q25.3       | Hs.29288  | 64772      | 0.033388 | 0.78 |
| 235205_at    | similar to solute carrier family 16 (monocarboxylic acid transporters), member 1                                                    | LOC34688    | chr8q23.1        | Hs.127286 | 346887     | 0.026267 | 0.78 |
| 218148_at    | hypothetical protein FLJ13111                                                                                                       | FLJ13111    | chr16q22.1       | Hs.288382 | 80152      | 0.031946 | 0.78 |
| 1561749_at   | Hypothetical protein MGC13098                                                                                                       | MGC13098    | chr7p13          | Hs.549219 | 84820      | 0.026898 | 0.77 |
| 201221_s_at  | small nuclear ribonucleoprotein 70kDa polypeptide (RNP antigen)                                                                     | SNRP70      | chr19q13.3       | Hs.467097 | 6625       | 0.010586 | 0.77 |
| 215147_at    | CUG triplet repeat, RNA binding protein 2                                                                                           | CUGBP2      | chr10p13         | Hs.309288 | 10659      | 0.012478 | 0.77 |
| 235746_s_at  | phospholipase A2 receptor 1, 180kDa                                                                                                 | PLA2R1      | chr2q23-q24      | Hs.410477 | 22925      | 0.018483 | 0.77 |
| 235418_at    | hypothetical protein LOC285014                                                                                                      | LOC285014   | chr2q11.2        | Hs.531247 | 285014     | 0.018527 | 0.77 |
| 230932_at    | Transcribed locus                                                                                                                   |             |                  | Hs.8038   |            | 0.002900 | 0.77 |
| 233084_s_at  | chromosome 10 open reading frame 94                                                                                                 | C10orf94    | chr10q26.3       | Hs.549231 | 93426      | 0.014241 | 0.76 |
| 233393_at    | Methionine sulfoxide reductase A                                                                                                    | MSRA        | chr8p23.1        | Hs.490981 | 4482       | 0.026175 | 0.76 |
| 229310_at    | kelch repeat and BTB (POZ) domain containing 9                                                                                      | KBTD9       | chr2p24.1        | Hs.130593 | 114818     | 0.005392 | 0.75 |
| 214291_at    | ribosomal protein L17 /// similar to dj612B15.1 (novel protein similar to                                                           | RPL17 /// d | chr18q21 /// chr | Hs.526159 | 388132 /// | 0.015917 | 0.75 |
| 205447_s_at  | mitogen-activated protein kinase kinase kinase 12                                                                                   | MAP3K12     | chr12q13         | Hs.211601 | 7786       | 0.018487 | 0.75 |
| 203155_at    | SET domain, bifurcated 1                                                                                                            | SETDB1      | chr1q21          | Hs.516278 | 9869       | 0.021571 | 0.75 |
| 212723_at    | phosphatidylserine receptor                                                                                                         | PTDSR       | chr17q25         | Hs.514505 | 23210      | 0.035573 | 0.75 |
| 218507_at    | hypoxia-inducible protein 2                                                                                                         | HIG2        | chr7q32.2        | Hs.521171 | 29923      | 0.027431 | 0.75 |
| 201601_x_at  | interferon induced transmembrane protein 1 (9-27)                                                                                   | IFITM1      | chr11p15.5       | Hs.458414 | 8519       | 0.009302 | 0.75 |
| 1556464_a_at | hypothetical protein LOC257407                                                                                                      | LOC257407   | chr2q37.1        | Hs.526596 | 257407     | 0.004497 | 0.74 |
| 1568736_s_at | Discs, large (Drosophila) homolog-associated protein 1                                                                              | DLGAP1      | chr18p11.3       | Hs.549086 | 9229       | 0.015757 | 0.74 |
| 37996_s_at   | dystrophia myotonica-protein kinase                                                                                                 | DMPK        | chr19q13.3       | Hs.546249 | 1760       | 0.014468 | 0.74 |
| 244216_at    |                                                                                                                                     |             |                  |           |            | 0.028650 | 0.74 |
| 231635_x_at  | Ring finger protein 31                                                                                                              | RNF31       | chr14q11.2       | Hs.375217 | 55072      | 0.009657 | 0.73 |
| 242121_at    | Ring finger protein 12                                                                                                              | RNF12       | chrXq13-q21      | Hs.122121 | 51132      | 0.033101 | 0.73 |
| 235964_x_at  | SAM domain and HD domain 1                                                                                                          | SAMHD1      | chr20pter-q12    | Hs.472630 | 25939      | 0.039421 | 0.73 |
| 33132_at     | cleavage and polyadenylation specific factor 1, 160kDa                                                                              | CPSF1       | chr8q24.23       | Hs.493202 | 29894      | 0.025462 | 0.73 |
| 205741_s_at  | dystrobrevin, alpha                                                                                                                 | DTNA        | chr18q12         | Hs.58919  | 1837       | 0.015469 | 0.73 |
| 202153_s_at  | nucleoporin 62kDa                                                                                                                   | NUP62       | chr19q13.33      | Hs.467133 | 23636      | 0.047586 | 0.73 |
| 218180_s_at  | EPS8-like 2                                                                                                                         | EPS8L2      | chr11p15.5       | Hs.55016  | 64787      | 0.040438 | 0.72 |
| 211386_at    | hypothetical protein MGC12488                                                                                                       | MGC12488    |                  |           | 84786      | 0.006225 | 0.72 |
| 47083_at     | chromosome 7 open reading frame 26                                                                                                  | C7orf26     | chr7p22.1        | Hs.487511 | 79034      | 0.025351 | 0.72 |
| 220331_at    | cytochrome P450, family 46, subfamily A, polypeptide 1                                                                              | CYP46A1     | chr14q32.1       | Hs.25121  | 10858      | 0.038307 | 0.72 |
| 224472_x_at  | calcium binding protein Cab45 precursor /// calcium binding protein Cab45                                                           | Cab45       | chr1p36.33       | Hs.42806  | 51150      | 0.011107 | 0.72 |
| 204078_at    | synaptonemal complex protein SC65                                                                                                   | SC65        | chr17q21.2       | Hs.446459 | 10609      | 0.015604 | 0.72 |
| 208581_x_at  | metallothionein 1X                                                                                                                  | MT1X        | chr16q13         | Hs.374950 | 4501       | 0.048516 | 0.72 |
| 222240_s_at  | myo-inositol 1-phosphate synthase A1                                                                                                | ISYNA1      | chr19p13.11      | Hs.405873 | 51477      | 0.029867 | 0.72 |
| 1558041_a_at | hypothetical protein LOC283849                                                                                                      | LOC283849   | chr16q22.1       | Hs.444594 | 283849     | 0.028450 | 0.71 |
| 218205_s_at  | MAP kinase interacting serine/threonine kinase 2                                                                                    | MKMK2       | chr19p13.3       | Hs.515032 | 2872       | 0.034530 | 0.71 |
| 227211_at    | PHD finger protein 19                                                                                                               | PHF19       | chr9q33.2        | Hs.460124 | 26147      | 0.028612 | 0.71 |
| 235875_at    | Solute carrier family 1 (glutamate/neutral amino acid transporter), member 1                                                        | SLC1A4      | chr2p15-p13      | Hs.323878 | 6509       | 0.033125 | 0.71 |
| 212975_at    | KIAA0870 protein                                                                                                                    | KIAA0870    | chr8q24.3        | Hs.18166  | 22898      | 0.037298 | 0.71 |
| 226419_s_at  | Splicing factor, arginine/serine-rich 1 (splicing factor 2, alternate splicing)                                                     | SFRS1       | chr17q21.3-q22   | Hs.68714  | 6426       | 0.008737 | 0.70 |
| 233944_at    | Homo sapiens, clone IMAGE:5311320, mRNA                                                                                             |             |                  | Hs.190621 |            | 0.006695 | 0.70 |
| 203938_s_at  | TATA box binding protein (TBP)-associated factor, RNA polymerase I, C, 1                                                            | TAF1C       | chr16q24         | Hs.153022 | 9013       | 0.016377 | 0.70 |
| 225168_at    | FERM domain containing 4A                                                                                                           | FRMD4A      | chr10p13         | Hs.552599 | 55691      | 0.017820 | 0.70 |
| 204430_s_at  | solute carrier family 2 (facilitated glucose/fructose transporter), member 1                                                        | SLC2A5      | chr1p36.2        | Hs.530003 | 6518       | 0.025249 | 0.70 |
| 218175_at    | limkain beta 2                                                                                                                      | FLJ22471    | chr12q24.31      | Hs.114111 | 80212      | 0.039725 | 0.70 |
| 218601_at    | up-regulated gene 4                                                                                                                 | URG4        | chr7p13          | Hs.520334 | 55665      | 0.043947 | 0.69 |
| 219999_at    | mannosidase, alpha, class 2A, member 2                                                                                              | MAN2A2      | chr15q26.1       | Hs.116459 | 4122       | 0.003795 | 0.69 |
| 224162_s_at  | F-box protein 31                                                                                                                    | FBXO31      | chr16q24.2       | Hs.549198 | 79791      | 0.010088 | 0.69 |
| 36129_at     | RUN and TBC1 domain containing 1                                                                                                    | RUTBC1      | chr17p13.3       | Hs.513861 | 9905       | 0.017177 | 0.69 |
| 201680_x_at  | arsenate resistance protein ARS2                                                                                                    | ARS2        | chr7q21          | Hs.111801 | 51593      | 0.025054 | 0.69 |
| 211724_x_at  | hypothetical protein FLJ20323 /// hypothetical protein FLJ20323                                                                     | FLJ20323    | chr7p22-p21      | Hs.520215 | 54468      | 0.015229 | 0.69 |
| 237937_x_at  |                                                                                                                                     |             |                  |           |            | 0.045989 | 0.69 |
| 235529_x_at  | SAM domain and HD domain 1                                                                                                          | SAMHD1      | chr20pter-q12    | Hs.472630 | 25939      | 0.038095 | 0.68 |
| 232809_s_at  | Fms-related tyrosine kinase 1 (vascular endothelial growth factor/vascular endothelial cell growth factor receptor tyrosine kinase) | FLT1        | chr13q12         | Hs.507621 | 2321       | 0.005343 | 0.68 |
| 65635_at     | endo-beta-N-acetylglucosaminidase                                                                                                   | FLJ21865    | chr17q25.3       | Hs.29288  | 64772      | 0.019671 | 0.68 |
| 214428_x_at  | complement component 4A /// complement component 4B /// complement component 4C                                                     | C4A /// C4B | chr6p21.3        | Hs.534847 | 432395 /// | 0.048543 | 0.68 |
| 241654_at    | Transcribed locus                                                                                                                   |             |                  | Hs.427229 |            | 0.049490 | 0.68 |
| 1556103_at   | CDNA FLJ30565 fis, clone BRAWH2005008                                                                                               |             |                  | Hs.323409 |            | 0.002762 | 0.68 |
| 1555311_at   |                                                                                                                                     |             |                  |           |            | 0.003828 | 0.68 |
| 221261_x_at  | melanoma antigen family D, 4 /// melanoma antigen family D, 4                                                                       | MAGED4      |                  | Hs.522650 | 81557      | 0.006403 | 0.67 |
| 200660_at    | S100 calcium binding protein A11 (calgizzarin)                                                                                      | S100A11     | chr1q21          | Hs.417004 | 6282       | 0.020369 | 0.67 |
| 1554287_at   | tripartite motif-containing 4                                                                                                       | TRIM4       | chr7q22-q31.1    | Hs.50749  | 89122      | 0.048969 | 0.67 |
| 1561658_at   | Protein phosphatase 2 (formerly 2A), regulatory subunit B (PR 52), beta 1                                                           | PPP2R2B     | chr5q31-5q32     | Hs.193825 | 5521       | 0.013079 | 0.67 |
| 229867_at    | BTB (POZ) domain containing 9                                                                                                       | BTBD9       | chr6p21          | Hs.116233 | 114781     | 0.039744 | 0.67 |
| 223983_s_at  | chromosome 19 open reading frame 12                                                                                                 | C19orf12    | chr19q12         | Hs.529094 | 83636      | 0.000923 | 0.67 |
| 229871_at    | hypothetical protein FLJ10211                                                                                                       | FLJ10211    | chr19q13.2       | Hs.398091 | 55095      | 0.029370 | 0.67 |

|              |                                                                                                |               |                   |           |            |          |      |
|--------------|------------------------------------------------------------------------------------------------|---------------|-------------------|-----------|------------|----------|------|
| 244113_at    | Transcribed locus                                                                              |               |                   | Hs.436567 |            | 0.042804 | 0.67 |
| 217585_at    |                                                                                                |               |                   |           |            | 0.014680 | 0.66 |
| 243249_at    | Chromosome 14 open reading frame 119                                                           | C14orf119     | chr14q11.2        | Hs.525238 | 55017      | 0.025630 | 0.66 |
| 213165_at    | Centrosome-associated protein 350                                                              | CAP350        | chr1p36.13-q41    | Hs.413045 | 9857       | 0.046558 | 0.66 |
| 227129_x_at  | hypothetical protein LOC284701 /// hypothetical gene supported by AK                           | LOC284701     | chr1p36.33 /// ch | Hs.546653 | 284701 /// | 0.018387 | 0.66 |
| 236484_at    | START domain containing 7                                                                      | STARTD7       | chr2q11.2         | Hs.469331 | 56910      | 0.003308 | 0.66 |
| 221816_s_at  | PHD finger protein 11                                                                          | PHF11         | chr13q14.2        | Hs.369039 | 51131      | 0.021569 | 0.66 |
| 243256_at    | MAP kinase interacting serine/threonine kinase 1                                               | MKNK1         | chr1p33           | Hs.371594 | 8569       | 0.011624 | 0.66 |
| 1557814_a_at | Single-stranded DNA binding protein 2                                                          | SSBP2         | chr5q14.1         | Hs.102735 | 23635      | 0.045484 | 0.65 |
| 1558748_at   | N-acyl-phosphatidylethanolamine-hydrolyzing phospholipase D                                    | NAPE-PLD      | chr7q22.1         | Hs.324271 | 222236     | 0.025084 | 0.65 |
| 235077_at    | Maternally expressed 3                                                                         | MEG3          | chr14q32          | Hs.525589 | 55384      | 0.019848 | 0.65 |
| 228064_at    | similar to hypothetical protein LOC192734                                                      | LOC388888     | chr22q11.23       | Hs.113314 | 388886     | 0.016729 | 0.65 |
| 204139_x_at  | zinc finger protein 42 (myeloid-specific retinoic acid-responsive)                             | ZNF42         | chr19q13.2-q13.4  | Hs.399810 | 7593       | 0.045674 | 0.65 |
| 1556672_a_at | RNA binding motif protein 6                                                                    | RBM6          | chr3p21.3         | Hs.188879 | 10180      | 0.014390 | 0.65 |
| 219860_at    | lymphocyte antigen 6 complex, locus G5C                                                        | LY6G5C        | chr6p21.33        | Hs.25738  | 80741      | 0.033819 | 0.65 |
| 227500_at    | F-box and leucine-rich repeat protein 18                                                       | FBXL18        | chr7p22.1         | Hs.487447 | 80028      | 0.043961 | 0.65 |
| 1559546_s_at | SNRNP upstream reading frame /// Prader-Willi/Angelman region-1                                | SNRNP ///     | chr15q11.2        | Hs.525700 | 145624 /// | 0.025389 | 0.65 |
| 203309_s_at  | Hermansky-Pudlak syndrome 1                                                                    | HPS1          | chr10q23.1-q23.3  | Hs.404568 | 3257       | 0.047252 | 0.65 |
| 206435_at    | UDP-N-acetyl-alpha-D-galactosamine:(N-acetylneuraminy)-galactosylgl                            | GALGT         | chr12q13.3        | Hs.159481 | 2583       | 0.048309 | 0.65 |
| 212359_s_at  | KIAA0913                                                                                       | KIAA0913      | chr10q22.2        | Hs.65135  | 23053      | 0.010219 | 0.65 |
| 218697_at    | NCK interacting protein with SH3 domain                                                        | NCKIPSD       | chr3p21           | Hs.102929 | 51517      | 0.044734 | 0.65 |
| 243526_at    | hypothetical protein LOC349136                                                                 | LOC349136     | chr7q36.1         | Hs.174373 | 349136     | 0.043088 | 0.64 |
| 223192_at    | solute carrier family 25, member 28                                                            | SLC25A28      | chr10q23-q24      | Hs.403790 | 81894      | 0.015879 | 0.64 |
| 238965_at    | Chromosome 21 open reading frame 2                                                             | C21orf2       | chr21q22.3        | Hs.517331 | 755        | 0.020472 | 0.64 |
| 213088_s_at  | DnaJ (Hsp40) homolog, subfamily C, member 9                                                    | DNAJC9        | chr10q22.2        | Hs.523037 | 23234      | 0.043522 | 0.64 |
| 37892_at     | collagen, type XI, alpha 1                                                                     | COL11A1       | chr1p21           | Hs.523446 | 1301       | 0.006354 | 0.64 |
| 239730_at    | Testis-specific serine kinase 2                                                                | STK22B        | chr22q11.21       | Hs.505323 | 23617      | 0.038494 | 0.64 |
| 221767_x_at  | high density lipoprotein binding protein (vigilin)                                             | HDLBP         | chr2q37           | Hs.471851 | 3069       | 0.029695 | 0.64 |
| 210150_s_at  | laminin, alpha 5                                                                               | LAMA5         | chr20q13.2-q13.3  | Hs.473256 | 3911       | 0.030134 | 0.64 |
| 215731_s_at  | M-phase phosphoprotein 9                                                                       | MPHOSPH9      | chr12q24.31       | Hs.507175 | 10198      | 0.021935 | 0.64 |
| 221647_s_at  | likely ortholog of mouse synembryn                                                             | RIC8          | chr11p15.5        | Hs.19306  | 60626      | 0.031142 | 0.63 |
| 202605_at    | glucuronidase, beta                                                                            | GUSB          | chr7q21.11        | Hs.255230 | 2990       | 0.037929 | 0.63 |
| 234974_at    | Galactose mutarotase (aldose 1-epimerase)                                                      | GALM          | chr2p22.1         | Hs.435012 | 130589     | 0.032819 | 0.63 |
| 45526_g_at   | hypothetical protein FLJ14154                                                                  | FLJ14154      | chr16p13.3        | Hs.513296 | 79903      | 0.032941 | 0.63 |
| 235580_at    | Zinc finger protein 141 (clone pHZ-44)                                                         | ZNF141        | chr4p16.3         | Hs.546311 | 7700       | 0.012703 | 0.63 |
| 1558620_at   | zinc finger protein 621                                                                        | ZNF621        | chr3p22.1         | Hs.19977  | 285268     | 0.037889 | 0.63 |
| 220313_at    | G-protein coupled receptor 88                                                                  | GPR88         | chr1p21.3         | Hs.170053 | 54112      | 0.008085 | 0.63 |
| 214080_x_at  | protein kinase C substrate 80K-H                                                               | PRKCSH        | chr19p13.2        | Hs.512640 | 5589       | 0.023468 | 0.62 |
| 227833_s_at  | methyl-CpG binding domain protein 6                                                            | MBD6          | chr10q25.2        | Hs.524523 | 114785     | 0.030095 | 0.62 |
| 213105_s_at  | hypothetical protein MGC24381                                                                  | MGC24381      | chr16p13.3        | Hs.134846 | 115939     | 0.011720 | 0.62 |
| 233064_at    | hypothetical gene supported by AL365406; BC034005                                              | LOC388499     | chr19p13.3        | Hs.465612 | 388494     | 0.042960 | 0.62 |
| 242610_x_at  |                                                                                                |               |                   |           |            | 0.039034 | 0.62 |
| 222047_s_at  | arsenate resistance protein ARS2                                                               | ARS2          | chr7q21           | Hs.111801 | 51593      | 0.042557 | 0.62 |
| 201851_at    | SH3-domain GRB2-like 1                                                                         | SH3GL1        | chr19p13.3        | Hs.97616  | 6455       | 0.030410 | 0.62 |
| 227894_at    | similar to RIKEN cDNA 3230401M21 [Mus musculus]                                                | LOC197333     | chr16p13.3        | Hs.511903 | 197336     | 0.028514 | 0.62 |
| 48531_at     | TNFAIP3 interacting protein 2                                                                  | TNIP2         | chr4p16.3         | Hs.368551 | 79155      | 0.032076 | 0.62 |
| 213670_x_at  | Williams-Beuren Syndrome critical region protein 20 copy B                                     | WBSR20B       | chr7q11.23        | Hs.549260 | 155400     | 0.007835 | 0.62 |
| 1554825_at   |                                                                                                |               |                   |           |            | 0.009887 | 0.62 |
| 241970_at    | Poliovirus receptor-related 3                                                                  | PVRL3         | chr3q13           | Hs.293917 | 25945      | 0.013278 | 0.61 |
| 236904_x_at  | Tectorin alpha                                                                                 | TECTA         | chr11q22-q24      | Hs.248162 | 7007       | 0.007372 | 0.61 |
| 242437_at    |                                                                                                |               |                   |           |            | 0.015264 | 0.61 |
| 243003_at    | Myeloid/lymphoid or mixed-lineage leukemia (trithorax homolog, Drosophila)                     | MLLT10        | chr10p12          | Hs.30385  | 8028       | 0.013784 | 0.61 |
| 229849_at    | Transcribed locus, weakly similar to XP_517655.1 similar to KIAA0825 protein [Pan troglodytes] |               |                   | Hs.380698 |            | 0.006619 | 0.61 |
| 235444_at    | forkhead box P1                                                                                | FOXP1         | chr3p14.1         | Hs.431498 | 27086      | 0.019034 | 0.61 |
| 217807_s_at  | glioma tumor suppressor candidate region gene 2                                                | GLTSCR2       | chr19q13.3        | Hs.421907 | 29997      | 0.010142 | 0.61 |
| 208749_x_at  | flotillin 1                                                                                    | FLOT1         | chr6p21.3         | Hs.179986 | 10211      | 0.019040 | 0.61 |
| 210142_x_at  | flotillin 1                                                                                    | FLOT1         | chr6p21.3         | Hs.179986 | 10211      | 0.027816 | 0.61 |
| 205432_at    | oviductal glycoprotein 1, 120kDa (mucin 9, oviductin)                                          | OVGP1         | chr1p13           | Hs.1154   | 5016       | 0.039076 | 0.61 |
| 212735_at    | KIAA0226                                                                                       | KIAA0226      | chr3q29           | Hs.478868 | 9711       | 0.038886 | 0.61 |
| 236924_at    | Novel protein                                                                                  | RP11-163N11.1 | chr1p22.1         | Hs.272015 | 388649     | 0.009297 | 0.61 |
| 1552634_a_at | zinc finger protein 101                                                                        | ZNF101        | chr19p13.11       | Hs.164284 | 94039      | 0.002815 | 0.61 |
| 213557_at    | CDC2-related protein kinase 7                                                                  | CRK7          | chr17q12          | Hs.416108 | 51755      | 0.007115 | 0.61 |
| 223727_at    | Kv channel interacting protein 2                                                               | KCNIP2        | chr10q24          | Hs.97044  | 30819      | 0.039278 | 0.60 |
| 1561642_at   | Phosphatase and actin regulator 1                                                              | PHACTR1       | chr6p24.1         | Hs.436996 | 221692     | 0.026914 | 0.60 |
| 203940_s_at  | KIAA1036                                                                                       | KIAA1036      | chr14q24.3        | Hs.525479 | 22846      | 0.006266 | 0.60 |
| 214096_s_at  | serine hydroxymethyltransferase 2 (mitochondrial)                                              | SHMT2         | chr12q12-q14      | Hs.75069  | 6472       | 0.041589 | 0.60 |
| 230193_at    | hypothetical protein MGC33630                                                                  | MGC33630      | chr12q24.31       | Hs.507125 | 144406     | 0.026493 | 0.60 |
| 221612_at    | HTO17 protein                                                                                  | HTO17         | chr3p14.3         | Hs.552600 | 57408      | 0.016956 | 0.60 |
| 1556001_at   | hypothetical protein LOC284939                                                                 | LOC284939     | chr22q13.33       | Hs.337266 | 284939     | 0.030568 | 0.60 |
| 34221_at     | KIAA0194                                                                                       | KIAA0194      | chr5q33.1         | Hs.549664 | 22993      | 0.028512 | 0.59 |
| 244859_at    | Phosphodiesterase 4D interacting protein (myomegalin)                                          | PDE4DIP       | chr1q12           | Hs.487925 | 9659       | 0.005185 | 0.59 |
| 227208_at    | similar to DLNB14                                                                              | DLNB14        | chr11q23.3        | Hs.534613 | 338657     | 0.034317 | 0.59 |
| 236210_at    | DEAD (Asp-Glu-Ala-Asp) box polypeptide 31                                                      | DDX31         | chr9q34.13        | Hs.495410 | 64794      | 0.036422 | 0.59 |
| 223843_at    | scavenger receptor class A, member 3                                                           | SCARA3        | chr8p21           | Hs.128856 | 51435      | 0.042767 | 0.59 |

|              |                                                                                                  |              |                  |           |        |          |       |
|--------------|--------------------------------------------------------------------------------------------------|--------------|------------------|-----------|--------|----------|-------|
| 243594_x_at  | spire homolog 2 (Drosophila)                                                                     | SPIRE2       | chr16q24         | Hs.461786 | 84501  | 0.017746 | 0.59  |
| 223522_at    | chromosome 9 open reading frame 45                                                               | C9orf45      | chr9q33.3        | Hs.21379  | 81571  | 0.045707 | 0.59  |
| 242688_at    | Thyroid hormone receptor interactor 12                                                           | TRIP12       | chr2q36.3        | Hs.368985 | 9320   | 0.024127 | 0.59  |
| 231890_at    | CDNA FLJ12742 fis, clone NT2RP2000644                                                            |              |                  | Hs.273830 |        | 0.001731 | 0.59  |
| 234946_at    | ectonucleoside triphosphate diphosphohydrolase 6 (putative function)                             | ENTPD6       | chr20p11.2-p11.2 | Hs.500375 | 955    | 0.037044 | 0.59  |
| 206402_s_at  | neuropeptide FF-amide peptide precursor                                                          | NPFF         | chr12q13.13      | Hs.104555 | 8620   | 0.018024 | 0.59  |
| 229100_s_at  | translocase of inner mitochondrial membrane 22 homolog (yeast)                                   | TIMM22       | chr17p13         | Hs.87595  | 29928  | 0.042053 | 0.59  |
| 213870_at    | collagen, type XI, alpha 2                                                                       | COL11A2      | chr6p21.3        | Hs.390171 | 1302   | 0.031440 | 0.58  |
| 210580_x_at  | sulfotransferase family, cytosolic, 1A, phenol-preferring, member 3                              | SULT1A3      | chr16p11.2       | Hs.460587 | 6818   | 0.031892 | 0.58  |
| 59625_at     | nucleolar protein 3 (apoptosis repressor with CARD domain)                                       | NOL3         | chr16q21-q23     | Hs.513667 | 8996   | 0.009000 | 0.58  |
| 214273_x_at  | chromosome 16 open reading frame 35                                                              | C16orf35     | chr16p13.3       | Hs.19699  | 8131   | 0.021115 | 0.58  |
| 244377_at    | Solute carrier family 1 (glutamate/neutral amino acid transporter), mem                          | SLC1A4       | chr2p15-p13      | Hs.323878 | 6509   | 0.023712 | 0.58  |
| 235302_at    | Full-length cDNA clone CS0CAP006YP08 of Thymus of Homo sapiens (human)                           |              |                  | Hs.169812 |        | 0.037836 | -0.58 |
| 225659_at    | hypothetical protein LOC339745                                                                   | LOC339745    | chr2q22.1        | Hs.333297 | 339745 | 0.005384 | -0.58 |
| 223470_at    | phosphatidylinositol glycan, class M                                                             | PIGM         | chr1q23.2        | Hs.512837 | 93183  | 0.026224 | -0.58 |
| 224975_at    | nuclear factor I/A                                                                               | NFIA         | chr1p31.3-p31.2  | Hs.191911 | 4774   | 0.029832 | -0.58 |
| 201963_at    | acyl-CoA synthetase long-chain family member 1                                                   | ACSL1        | chr4q34-q35      | Hs.406678 | 2180   | 0.022260 | -0.58 |
| 213872_at    | Chromosome 6 open reading frame 62                                                               | C6orf62      | chr6p22.2        | Hs.519930 | 81688  | 0.039018 | -0.58 |
| 217883_at    | chromosome 2 open reading frame 25                                                               | C2orf25      | chr2q23.3        | Hs.5324   | 27249  | 0.004622 | -0.58 |
| 229167_at    | Purine-rich element binding protein A                                                            | PURA         | chr5q31          | Hs.443121 | 5813   | 0.000211 | -0.58 |
| 1557363_a_at | pleckstrin homology domain interacting protein                                                   | PHIP         | chr6q14          | Hs.511817 | 55023  | 0.010461 | -0.58 |
| 232432_s_at  | solute carrier family 30 (zinc transporter), member 5                                            | SLC30A5      | chr5q12.1        | Hs.482363 | 64924  | 0.028313 | -0.58 |
| 1555037_a_at | isocitrate dehydrogenase 1 (NADP+), soluble                                                      | IDH1         | chr2q33.3        | Hs.11223  | 3417   | 0.000769 | -0.58 |
| 202226_s_at  | v-crk sarcoma virus CT10 oncogene homolog (avian)                                                | CRK          | chr17p13.3       | Hs.461896 | 1398   | 0.047823 | -0.58 |
| 219164_s_at  | chromosome 14 open reading frame 103                                                             | C14orf103    | chr14q32.2       | Hs.168241 | 55102  | 0.041258 | -0.58 |
| 236308_at    | hypothetical protein LOC285878                                                                   | LOC285878    | chr7p11.2        | Hs.548149 | 285878 | 0.026982 | -0.58 |
| 222752_s_at  | hypothetical protein FLJ10874                                                                    | FLJ10874     | chr1q32.3        | Hs.445386 | 55248  | 0.009168 | -0.58 |
| 206770_s_at  | solute carrier family 35 (UDP-N-acetylglucosamine (UDP-GlcNAc) transp                            | SLC35A3      | chr1p21          | Hs.448979 | 23443  | 0.018265 | -0.58 |
| 224602_at    | HCV F-transactivated protein 1                                                                   | LOC40115     | chr4q26          | Hs.173705 | 401152 | 0.027418 | -0.58 |
| 239678_at    | AP1 gamma subunit binding protein 1                                                              | AP1GBP1      | chr17q12         | Hs.101480 | 11276  | 0.006450 | -0.58 |
| 208899_x_at  | ATPase, H+ transporting, lysosomal 34kDa, V1 subunit D                                           | ATP6V1D      |                  | Hs.272630 | 51382  | 0.041395 | -0.58 |
| 213289_at    | Spermidine/spermine N1-acetyl transferase-like 1                                                 | SATL1        | chrXq21.1        | Hs.551594 | 340562 | 0.011020 | -0.58 |
| 219743_at    | hairy/enhancer-of-split related with YRPW motif 2                                                | HEY2         | chr6q22.2-q22.33 | Hs.144287 | 23493  | 0.034246 | -0.58 |
| 232426_at    | MRNA full length insert cDNA clone EUROIMAGE 30103                                               |              |                  | Hs.21754  |        | 0.038652 | -0.58 |
| 202214_s_at  | culin 4B                                                                                         | CUL4B        | chrXq23          | Hs.102914 | 8450   | 0.018298 | -0.58 |
| 227354_at    | FLJ37858 protein                                                                                 | FLJ37858     | chr8q21.13       | Hs.492106 | 441357 | 0.004603 | -0.58 |
| 238494_at    | TNF receptor-associated factor 3 interacting protein 1                                           | TRAF3IP1     | chr2q37.3        | Hs.43086  | 26146  | 0.041613 | -0.59 |
| 227246_at    |                                                                                                  |              |                  |           |        | 0.012569 | -0.59 |
| 222103_at    | Activating transcription factor 1                                                                | ATF1         | chr12q13         | Hs.435267 | 466    | 0.002317 | -0.59 |
| 228328_at    | CDNA FLJ33653 fis, clone BRAMY2024715                                                            |              |                  | Hs.550906 |        | 0.009103 | -0.59 |
| 218989_x_at  | solute carrier family 30 (zinc transporter), member 5                                            | SLC30A5      | chr5q12.1        | Hs.482363 | 64924  | 0.037081 | -0.59 |
| 218477_at    | transmembrane protein 14A                                                                        | TMEM14A      | chr6p12.3        | Hs.94896  | 28978  | 0.012355 | -0.59 |
| 227692_at    | guanine nucleotide binding protein (G protein), alpha inhibiting activity                        | GNAI1        | chr7q21          | Hs.134587 | 2770   | 0.001736 | -0.59 |
| 223006_s_at  | chromosome 9 open reading frame 5                                                                | C9orf5       | chr9q31          | Hs.308074 | 23731  | 0.047863 | -0.59 |
| 222679_s_at  | RP42 homolog                                                                                     | RP42         | chr3q26.3        | Hs.104613 | 54165  | 0.011011 | -0.59 |
| 216274_s_at  | SEC11-like 1 (S. cerevisiae)                                                                     | SEC11L1      | chr15q25.3       | Hs.9534   | 23478  | 0.040447 | -0.59 |
| 221516_s_at  | hypothetical protein FLJ20232                                                                    | FLJ20232     | chr22q13         | Hs.148677 | 54471  | 0.043156 | -0.59 |
| 219433_at    | BCL6 co-repressor                                                                                | BCOR         | chrXp11.4        | Hs.186424 | 54880  | 0.004624 | -0.59 |
| 203864_s_at  | actinin, alpha 2                                                                                 | ACTN2        | chr1q42-q43      | Hs.498178 | 88     | 0.012860 | -0.59 |
| 209197_at    | synaptotagmin XI                                                                                 | SYT11        | chr1q21.2        | Hs.32984  | 23208  | 0.023593 | -0.59 |
| 235215_at    | Transcribed locus, moderately similar to XP_498452.1 hypothetical gene supported by NM_173697 [H |              |                  | Hs.513356 |        | 0.008341 | -0.59 |
| 225894_at    | synaptopodin 2                                                                                   | SYNPO2       | chr4q26          | Hs.480615 | 171024 | 0.014119 | -0.59 |
| 213322_at    | chromosome 6 open reading frame 130                                                              | C6orf130     | chr6p21.1        | Hs.549281 | 221443 | 0.005781 | -0.59 |
| 224830_at    | cleavage and polyadenylation specific factor 5, 25 kDa                                           | CPSF5        | chr16q12.2       | Hs.528834 | 11051  | 0.004455 | -0.59 |
| 218511_s_at  | pyridoxine 5'-phosphate oxidase                                                                  | PNPO         | chr17q21.32      | Hs.514278 | 55163  | 0.045819 | -0.59 |
| 226779_at    | CDNA FLJ37302 fis, clone BRAMY2016009                                                            |              |                  | Hs.529759 |        | 0.009727 | -0.59 |
| 37512_at     | hydroxysteroid (17-beta) dehydrogenase 6                                                         | HSD17B6      | chr12q13         | Hs.524513 | 8630   | 0.045654 | -0.59 |
| 229273_at    | sal-like 1 (Drosophila)                                                                          | SALL1        | chr16q12.1       | Hs.135787 | 6299   | 0.036418 | -0.59 |
| 242826_at    | Transcribed locus                                                                                |              |                  | Hs.538962 |        | 0.016198 | -0.59 |
| 226338_at    | hypothetical protein DKFZp7620076                                                                | DKFZp7620076 | chr8q21.3        | Hs.202517 | 55529  | 0.023788 | -0.59 |
| 232184_at    | amyotrophic lateral sclerosis 2 (juvenile)                                                       | ALS2         | chr2q33.1        | Hs.471096 | 57679  | 0.047560 | -0.59 |
| 201165_s_at  | pumilio homolog 1 (Drosophila)                                                                   | PUM1         | chr1p35.2        | Hs.281707 | 9698   | 0.034896 | -0.59 |
| 202762_at    | Rho-associated, coiled-coil containing protein kinase 2                                          | ROCK2        | chr2p24          | Hs.58617  | 9475   | 0.047312 | -0.59 |
| 1552370_at   | hypothetical protein LOC132321                                                                   | LOC132321    | chr4q28.2        | Hs.533190 | 132321 | 0.038250 | -0.59 |
| 222466_s_at  | mitochondrial ribosomal protein L42                                                              | MRPL42       | chr12q22         | Hs.199579 | 28977  | 0.004477 | -0.59 |
| 212287_at    | suppressor of zeste 12 homolog (Drosophila)                                                      | SUZ12        | chr17q11.2       | Hs.462732 | 23512  | 0.019415 | -0.59 |
| 215422_at    | Cri-du-chat region mRNA, clone NIBB11.                                                           |              |                  | Hs.7057   |        | 0.038766 | -0.59 |
| 203310_at    | synaptin binding protein 3                                                                       | STXBP3       | chr1p13.3        | Hs.530436 | 6814   | 0.004549 | -0.59 |
| 201152_s_at  | muscleblind-like (Drosophila)                                                                    | MBNL1        | chr3q25          | Hs.478000 | 4154   | 0.046094 | -0.59 |
| 223374_s_at  | UDP-Gal:betaGlcNAc beta 1,3-galactosyltransferase, polypeptide 3                                 | B3GALT3      | chr3q25          | Hs.418062 | 8706   | 0.002317 | -0.59 |
| 238344_at    | Coatamer protein complex, subunit gamma 2                                                        | COPG2        | chr7q32          | Hs.532231 | 26958  | 0.036236 | -0.60 |
| 221449_s_at  | T-cell immunomodulatory protein /// T-cell immunomodulatory protein                              | CDA08        | chr16q12.1       | Hs.42217  | 81533  | 0.047979 | -0.60 |
| 201733_at    | chloride channel 3                                                                               | CLCN3        | chr4q33          | Hs.481186 | 1182   | 0.045892 | -0.60 |
| 1563933_a_at | hypothetical protein FLJ40773                                                                    | FLJ40773     | chr1q43          | Hs.498252 | 200150 | 0.037454 | -0.60 |



|              |                                                                                                                     |           |                             |           |                   |          |       |
|--------------|---------------------------------------------------------------------------------------------------------------------|-----------|-----------------------------|-----------|-------------------|----------|-------|
| 201830_s_at  | neuroepithelial cell transforming gene 1                                                                            | NET1      | chr10p15                    | Hs.25155  | 10276             | 0.018720 | -0.60 |
| 200056_s_at  | nuclear DNA-binding protein /// nuclear DNA-binding proteir                                                         | C1D       | chr2p13-p12                 | Hs.328883 | 10438             | 0.005070 | -0.60 |
| 225976_at    | similar to transcription factor BTF3                                                                                | MGC23908  | chr1p32.3                   | Hs.429839 | 91408             | 0.009429 | -0.60 |
| 222495_at    | protein x 013                                                                                                       | AD-020    | chr1p13.3                   | Hs.82933  | 56900             | 0.031434 | -0.60 |
| 244688_at    | Transcribed locus                                                                                                   |           |                             | Hs.175610 |                   | 0.010681 | -0.60 |
| 223242_s_at  | hypothetical protein ET                                                                                             | ET        | chr17q25                    | Hs.464166 | 79157             | 0.010072 | -0.60 |
| 201260_s_at  | synaptophysin-like protein                                                                                          | SYPL      | chr7q22.3                   | Hs.80919  | 6856              | 0.041432 | -0.60 |
| 201891_s_at  | beta-2-microglobulin                                                                                                | B2M       | chr15q21-q22.2              | Hs.534255 | 567               | 0.007696 | -0.60 |
| 218268_at    | TBC1 domain family, member 15                                                                                       | TBC1D15   | chr12q21.1                  | Hs.284630 | 64786             | 0.000401 | -0.60 |
| 212502_at    | chromosome 10 open reading frame 22                                                                                 | C10orf22  | chr10q21.3                  | Hs.99821  | 84890             | 0.007960 | -0.60 |
| 242348_at    | family with sequence similarity 19 (chemokine (C-C motif)-like), member 1                                           | FAM19A4   | chr3p14.1                   | Hs.187873 | 151647            | 0.005088 | -0.60 |
| 202898_at    | syndecan 3 (N-syndecan)                                                                                             | SDC3      | chr1pter-p22.3              | Hs.158287 | 9672              | 0.046845 | -0.60 |
| 219132_at    | pellino homolog 2 (Drosophila)                                                                                      | PELI2     | chr14q21                    | Hs.105103 | 57161             | 0.024703 | -0.60 |
| 239282_at    | NY-REN-58 antigen                                                                                                   | NY-REN-58 | chr12q22                    | Hs.279209 | 51134             | 0.029587 | -0.60 |
| 212887_at    | Sec23 homolog A (S. cerevisiae)                                                                                     | SEC23A    | chr14q21.1                  | Hs.272927 | 10484             | 0.024075 | -0.60 |
| 224832_at    | dual specificity phosphatase 16                                                                                     | DUSP16    | chr12p13                    | Hs.536535 | 80824             | 0.018765 | -0.60 |
| 218521_s_at  | hypothetical protein FLJ11011                                                                                       | FLJ11011  | chr8q21.11                  | Hs.492031 | 55284             | 0.041840 | -0.60 |
| 227665_at    | Mitochondrial carrier triple repeat 1                                                                               | MCART1    | chr9p13.3-p12               | Hs.46791  | 92014             | 0.028005 | -0.60 |
| 223823_at    | potassium large conductance calcium-activated channel, subfamily M, member 2                                        | KCNMB2    | chr3q26.2-q27.1             | Hs.478368 | 10242             | 0.000979 | -0.60 |
| 211933_s_at  | heterogeneous nuclear ribonucleoprotein A3 pseudogene 1 /// heterogeneous nuclear ribonucleoprotein A3 pseudogene 1 | HNRPA3P1  | chr10q11.21 /// chr10q11.21 | Hs.524276 | 10151 /// 10151   | 0.002225 | -0.60 |
| 227205_at    | TAF1 RNA polymerase II, TATA box binding protein (TBP)-associated factor 1                                          | TAF1      | chrXq13.1                   | Hs.158560 | 6872              | 0.009156 | -0.60 |
| 226161_at    | solute carrier family 30 (zinc transporter), member 6                                                               | SLC30A6   | chr12p22.3                  | Hs.552598 | 55676             | 0.018125 | -0.60 |
| 209357_at    | Cbp/p300-interacting transactivator, with Glu/Asp-rich carboxy-terminal domain 2                                    | CITED2    | chr6q23.3                   | Hs.82071  | 10370             | 0.013875 | -0.60 |
| 225246_at    | stromal interaction molecule 2                                                                                      | STIM2     | chr4p15.2                   | Hs.135763 | 57620             | 0.040871 | -0.60 |
| 212310_at    | C219-reactive peptide /// similar to C219-reactive peptide                                                          | KIAA0268  | chr1p36.33                  | Hs.508522 | 348477 /// 348477 | 0.003864 | -0.60 |
| 201238_s_at  | capping protein (actin filament) muscle Z-line, alpha 2                                                             | CAPZA2    | chr7q31.2-q31.3             | Hs.446123 | 830               | 0.006289 | -0.60 |
| 201646_at    | scavenger receptor class B, member 2                                                                                | SCARB2    | chr4q21.1                   | Hs.349656 | 950               | 0.014620 | -0.60 |
| 209025_s_at  | synaptotagmin binding, cytoplasmic RNA interacting protein                                                          | SYNCRIP   | chr6q14-q15                 | Hs.472056 | 10492             | 0.031622 | -0.60 |
| 231763_at    | polymerase (RNA) III (DNA directed) polypeptide A, 155kDa                                                           | POLR3A    | chr10q22-q23                | Hs.436896 | 11128             | 0.017624 | -0.61 |
| 205705_at    | ankyrin repeat domain 26                                                                                            | ANKRD26   | chr10pter-q22.1             | Hs.361041 | 22852             | 0.011185 | -0.61 |
| 203243_s_at  | PDZ and LIM domain 5                                                                                                | PDLIM5    | chr4q22                     | Hs.480311 | 10611             | 0.024210 | -0.61 |
| 224802_at    | Nedd4 family interacting protein 2                                                                                  | NDFIP2    | chr13q31.1                  | Hs.525093 | 54602             | 0.006858 | -0.61 |
| 203075_at    | SMAD, mothers against DPP homolog 2 (Drosophila)                                                                    | SMAD2     | chr18q21.1                  | Hs.12253  | 4087              | 0.002070 | -0.61 |
| 226998_at    | NMDA receptor regulated 1                                                                                           | NARG1     | chr4q31.1                   | Hs.518994 | 80155             | 0.009248 | -0.61 |
| 206115_at    | early growth response 3                                                                                             | EGR3      | chr8p23-p21                 | Hs.534313 | 1960              | 0.012442 | -0.61 |
| 1567219_at   |                                                                                                                     |           |                             |           |                   | 0.009198 | -0.61 |
| 202089_s_at  | solute carrier family 39 (zinc transporter), member 6                                                               | SLC39A6   | chr18q12.2                  | Hs.79136  | 25800             | 0.007050 | -0.61 |
| 202055_at    | Karyopherin alpha 1 (importin alpha 5)                                                                              | KPNA1     | chr3q21                     | Hs.161008 | 3836              | 0.023377 | -0.61 |
| 218674_at    | hypothetical protein FLJ13611                                                                                       | FLJ13611  | chr5q12.3                   | Hs.482301 | 80006             | 0.018418 | -0.61 |
| 204035_at    | secretogranin II (chromogranin C)                                                                                   | SCG2      | chr2q35-q36                 | Hs.516726 | 7857              | 0.036762 | -0.61 |
| 201627_s_at  | insulin induced gene 1                                                                                              | INSIG1    | chr7q36                     | Hs.520819 | 3638              | 0.004572 | -0.61 |
| 230068_s_at  | Paternally expressed 3                                                                                              | PEG3      | chr19q13.4                  | Hs.201776 | 5178              | 0.025675 | -0.61 |
| 201866_s_at  | nuclear receptor subfamily 3, group C, member 1 (glucocorticoid receptor)                                           | NR3C1     | chr5q31                     | Hs.122926 | 2908              | 0.013481 | -0.61 |
| 209705_at    | likely ortholog of mouse metal response element binding transcription factor 1                                      | MTF1      | chr1p22.1                   | Hs.31016  | 22823             | 0.020547 | -0.61 |
| 210471_s_at  | potassium voltage-gated channel, shaker-related subfamily, beta member 1                                            | KCNAB1    | chr3q26.1                   | Hs.157818 | 7881              | 0.046349 | -0.61 |
| 201560_at    | chloride intracellular channel 4                                                                                    | CLIC4     | chr1p36.11                  | Hs.440544 | 25932             | 0.030408 | -0.61 |
| 222420_s_at  | ubiquitin-conjugating enzyme E2H (UBC8 homolog, yeast)                                                              | UBE2H     | chr7q32                     | Hs.344165 | 7328              | 0.023418 | -0.61 |
| 209006_s_at  | NPD014 protein                                                                                                      | NPD014    | chr1p36.13-p35.1            | Hs.259412 | 57035             | 0.041354 | -0.61 |
| 1558700_s_at | zinc finger protein 260                                                                                             | ZFP260    | chr19q13.12                 | Hs.18103  | 339324            | 0.001615 | -0.61 |
| 204333_s_at  | aspartylglucosaminidase                                                                                             | AGA       | chr4q32-q33                 | Hs.207776 | 175               | 0.049760 | -0.61 |
| 225892_at    | Iron-responsive element binding protein 2                                                                           | IREB2     | chr15q25.1                  | Hs.436031 | 3658              | 0.014687 | -0.61 |
| 200059_s_at  | ras homolog gene family, member A /// ras homolog gene family, member A                                             | RHOA      | chr3p21.3                   | Hs.247077 | 387               | 0.003841 | -0.61 |
| 218191_s_at  | chromosome 6 open reading frame 209                                                                                 | C6orf209  | chr6q13                     | Hs.271643 | 55788             | 0.011525 | -0.61 |
| 242100_at    | chondroitin sulfate synthase 3                                                                                      | CSS3      | chr5q23.3                   | Hs.213137 | 337876            | 0.011891 | -0.61 |
| 201067_at    | proteasome (prosome, macropain) 26S subunit, ATPase, 2                                                              | PSMC2     | chr7q22.1-q22.3             | Hs.437366 | 5701              | 0.029963 | -0.61 |
| 218128_at    | nuclear transcription factor Y, beta                                                                                | NFYB      | chr12q22-q23                | Hs.84928  | 4801              | 0.039018 | -0.61 |
| 210537_s_at  | transcriptional adaptor 2 (ADA2 homolog, yeast)-like                                                                | TADA2L    | chr17q12-q21                | Hs.500066 | 6871              | 0.015331 | -0.61 |
| 1552617_a_at | ring finger and WD repeat domain 2                                                                                  | RFWD2     | chr1q25.1-q25.2             | Hs.523744 | 64326             | 0.039189 | -0.61 |
| 225941_at    | eukaryotic translation initiation factor 4E member 3                                                                | EIF4E3    | chr3p14                     | Hs.476782 | 317649            | 0.025950 | -0.61 |
| 203132_at    | retinoblastoma 1 (including osteosarcoma)                                                                           | RB1       | chr13q14.2                  | Hs.408528 | 5925              | 0.026207 | -0.61 |
| 208840_s_at  | Ras-GTPase activating protein SH3 domain-binding protein 2                                                          | G3BP2     | chr4q21.1                   | Hs.303676 | 9908              | 0.019110 | -0.61 |
| 233002_at    | KIAA1622                                                                                                            | KIAA1622  | chr14q32.13                 | Hs.259599 | 57718             | 0.017196 | -0.61 |
| 229240_at    | CDNA clone IMAGE:4838003, partial cds                                                                               |           |                             | Hs.548738 |                   | 0.004242 | -0.61 |
| 221787_at    | PHD finger protein 10                                                                                               | PHF10     | chr6q27                     | Hs.435933 | 55274             | 0.007057 | -0.61 |
| 211022_s_at  | alpha thalassemia/mental retardation syndrome X-linked (RAD54 homolog)                                              | ATRAX     | chrXq13.1-q21.1             | Hs.533526 | 546               | 0.027666 | -0.61 |
| 230958_s_at  | Full length insert cDNA clone ZD69D05                                                                               |           |                             | Hs.379253 |                   | 0.040378 | -0.61 |
| 224630_at    | chromosome 2 open reading frame 30                                                                                  | C2orf30   | chr2p16.3                   | Hs.438336 | 27248             | 0.004058 | -0.61 |
| 227033_at    | protein disulfide isomerase-associated 3                                                                            | PDIA3     | chr15q15                    | Hs.308709 | 2923              | 0.034061 | -0.61 |
| 225325_at    | FLJ20160 protein                                                                                                    | FLJ20160  | chr2q32.2                   | Hs.418581 | 54842             | 0.037654 | -0.61 |
| 212073_at    | casein kinase 2, alpha 1 polypeptide                                                                                | CSNK2A1   | chr20p13                    | Hs.446484 | 1457              | 0.048544 | -0.61 |
| 233546_at    | CDNA FLJ13003 fis, clone NT2RP3000418                                                                               |           |                             | Hs.301533 |                   | 0.010952 | -0.61 |
| 241407_at    | CDNA FLJ11682 fis, clone HEMBA1004880                                                                               |           |                             | Hs.191828 |                   | 0.020526 | -0.61 |
| 217540_at    | Transcribed locus, weakly similar to XP_510104.1 similar to hypothetical protein FLJ25224 [Pan troglodytes]         |           |                             | Hs.518129 |                   | 0.009990 | -0.61 |
| 225942_at    | neurolysin (metallopeptidase M3 family)                                                                             | NLN       | chr5q12.3                   | Hs.247460 | 57486             | 0.007555 | -0.61 |

|              |                                                                                       |               |                  |           |          |  |  |          |       |
|--------------|---------------------------------------------------------------------------------------|---------------|------------------|-----------|----------|--|--|----------|-------|
| 235072_s_at  | Transcribed locus                                                                     |               |                  |           | Hs.94499 |  |  | 0.037769 | -0.61 |
| 224682_at    | ankyrin repeat and IBR domain containing 1                                            | ANKIB1        | chr7q21.2        | Hs.83293  | 54467    |  |  | 0.008424 | -0.61 |
| 238649_at    | phosphatidylinositol transfer protein, cytoplasmic 1                                  | PITPNC1       | chr17q24.2       | Hs.549130 | 26207    |  |  | 0.002924 | -0.62 |
| 225435_at    | Signal sequence receptor, alpha (translocon-associated protein alpha)                 | SSR1          | chr6p24.3        | Hs.114033 | 6745     |  |  | 0.043906 | -0.62 |
| 229097_at    | Homo sapiens, Similar to diaphanous homolog 3 (Drosophila), clone IMAGE:5277415, mRNA |               |                  | Hs.444351 |          |  |  | 0.022761 | -0.62 |
| 208945_s_at  | beclin 1 (coiled-coil, myosin-like BCL2 interacting protein)                          | BECN1         | chr17q21         | Hs.12272  | 8678     |  |  | 0.006816 | -0.62 |
| 200929_at    | transmembrane trafficking protein                                                     | TMP21         | chr14q24.3       | Hs.74137  | 10972    |  |  | 0.009711 | -0.62 |
| 217819_at    | golgi autoantigen, golgin subfamily a, 7                                              | GOLGA7        | chr8p11.21       | Hs.7953   | 51125    |  |  | 0.012446 | -0.62 |
| 221478_at    | BCL2/adenovirus E1B 19kDa interacting protein 3-like /// BCL2/adenovir                | BNIP3L        | chr8p21          | Hs.131226 | 665      |  |  | 0.039810 | -0.62 |
| 222975_s_at  | upstream of NRAS                                                                      | UNR           | chr1p22          | Hs.69855  | 7812     |  |  | 0.026946 | -0.62 |
| 231921_at    | hypothetical protein FLJ13096                                                         | FLJ13096      | chr2q31.1        | Hs.413518 | 80067    |  |  | 0.010677 | -0.62 |
| 209257_s_at  | chondroitin sulfate proteoglycan 6                                                    | CSPG6         | chr10q25         | Hs.24485  | 9126     |  |  | 0.035499 | -0.62 |
| 226770_at    | membrane-associated guanylate kinase-related (MAGI-3)                                 | MAGI-3        | chr1p12-p11.2    | Hs.486189 | 260425   |  |  | 0.040392 | -0.62 |
| 212724_at    | Rho family GTPase 3                                                                   | RND3          | chr2q23.3        | Hs.6838   | 390      |  |  | 0.007758 | -0.62 |
| 222731_at    | zinc finger, DHHC domain containing 2                                                 | ZDHHC2        | chr8p21.3-p22    | Hs.443852 | 51201    |  |  | 0.000340 | -0.62 |
| 225974_at    | hypothetical protein DKFZp762C1112                                                    | DKFZp762C1112 | chr8q21.3        | Hs.546514 | 169200   |  |  | 0.000154 | -0.62 |
| 222633_at    | transducin (beta)-like 1X-linked receptor 1                                           | TBL1XR1       | chr3q26.32       | Hs.438970 | 79718    |  |  | 0.009489 | -0.62 |
| 204525_at    | PHD finger protein 14                                                                 | PHF14         | chr7p21.3        | Hs.159918 | 9678     |  |  | 0.025213 | -0.62 |
| 215073_s_at  | nuclear receptor subfamily 2, group F, member 2                                       | NR2F2         | chr15q26         | Hs.347991 | 7026     |  |  | 0.002849 | -0.62 |
| 210843_s_at  | microfibrillar-associated protein 3-like                                              | MFAP3L        | chr4q32.3        | Hs.178121 | 9848     |  |  | 0.016440 | -0.62 |
| 218981_at    | ACN9 homolog (S. cerevisiae)                                                          | ACN9          | chr7q21.3        | Hs.42785  | 57001    |  |  | 0.013166 | -0.62 |
| 208783_s_at  | membrane cofactor protein (CD46, trophoblast-lymphocyte cross-reacti                  | MCP           | chr1q32          | Hs.510402 | 4179     |  |  | 0.010078 | -0.62 |
| 204182_s_at  | zinc finger protein 297B                                                              | ZNF297B       | chr9p24.1-q22.32 | Hs.355581 | 23099    |  |  | 0.018473 | -0.62 |
| 217858_s_at  | armadillo repeat containing, X-linked 3                                               | ARMCX3        | chrXq21.33-q22.2 | Hs.172788 | 51566    |  |  | 0.004405 | -0.62 |
| 227018_at    | dipeptidylpeptidase 8                                                                 | DPP8          | chr15q22         | Hs.458609 | 54878    |  |  | 0.014598 | -0.62 |
| 221960_s_at  | RAB2, member RAS oncogene family                                                      | RAB2          | chr8q12.1        | Hs.369017 | 5862     |  |  | 0.023921 | -0.62 |
| 223760_s_at  |                                                                                       |               |                  |           |          |  |  | 0.026938 | -0.62 |
| 220926_s_at  | chromosome 1 open reading frame 22                                                    | C1orf22       | chr1q24-q25      | Hs.523811 | 80267    |  |  | 0.002461 | -0.62 |
| 235504_at    | gremlin 2 homolog, cysteine knot superfamily (Xenopus laevis)                         | GREM2         | chr1q43          | Hs.98206  | 64388    |  |  | 0.032631 | -0.62 |
| 224636_at    | zinc finger protein 91 homolog (mouse)                                                | ZFP91         | chr11q12         | Hs.524920 | 80829    |  |  | 0.012211 | -0.62 |
| 212217_at    | prolyl endopeptidase-like                                                             | PREPL         | chr2p22.1        | Hs.549585 | 9581     |  |  | 0.015117 | -0.62 |
| 201604_s_at  | protein phosphatase 1, regulatory (inhibitor) subunit 12A                             | PPP1R12A      | chr12q15-q21     | Hs.49582  | 4659     |  |  | 0.026369 | -0.62 |
| 239486_at    | Transcribed locus                                                                     |               |                  | Hs.366034 |          |  |  | 0.000615 | -0.62 |
| 204675_at    | steroid-5-alpha-reductase, alpha polypeptide 1 (3-oxo-5 alpha-steroid d               | SRD5A1        | chr5p15          | Hs.552    | 6715     |  |  | 0.031496 | -0.62 |
| 1552658_a_at | neuron navigator 3                                                                    | NAV3          |                  | Hs.306322 | 89795    |  |  | 0.030266 | -0.62 |
| 214617_at    | perforin 1 (pore forming protein) /// perforin 1 (pore forming protein)               | PRF1          | chr10q22         | Hs.2200   | 5551     |  |  | 0.011937 | -0.63 |
| 209576_at    | guanine nucleotide binding protein (G protein), alpha inhibiting activit              | GNAI1         | chr7q21          | Hs.134587 | 2770     |  |  | 0.001824 | -0.63 |
| 1555246_a_at | sodium channel, voltage-gated, type I, alpha                                          | SCN1A         | chr2q24.3        | Hs.22654  | 6323     |  |  | 0.034135 | -0.63 |
| 208021_s_at  | replication factor C (activator 1) 1, 145kDa /// replication factor C (activa         | RFC1          | chr4p14-p13      | Hs.507475 | 5981     |  |  | 0.040778 | -0.63 |
| 221761_at    | adenylosuccinate synthase                                                             | ADSS          | chr1cen-q12      | Hs.498313 | 159      |  |  | 0.028319 | -0.63 |
| 242470_at    | hypothetical protein FLJ38944                                                         | FLJ38944      | chr19q13.2       | Hs.135181 | 126272   |  |  | 0.044746 | -0.63 |
| 243042_at    | FLJ35093 protein                                                                      | FLJ35093      | chr1p31.1        | Hs.156625 | 374986   |  |  | 0.017712 | -0.63 |
| 217678_at    | solute carrier family 7, (cationic amino acid transporter, y+ system) mem             | SLC7A11       | chr4q28-q32      | Hs.6682   | 23657    |  |  | 0.018375 | -0.63 |
| 228574_at    | Hypothetical protein DKFZp762A217                                                     | DKFZp762A217  | chr12q21.31      | Hs.444240 | 160335   |  |  | 0.008177 | -0.63 |
| 226637_at    | Ubiquitin-conjugating enzyme E2H (UBC8 homolog, yeast)                                | UBE2H         | chr7q32          | Hs.344165 | 7328     |  |  | 0.025505 | -0.63 |
| 223315_at    | netrin 4                                                                              | NTN4          | chr12q22-q23     | Hs.201034 | 59277    |  |  | 0.008671 | -0.63 |
| 222438_at    | mediator of RNA polymerase II transcription, subunit 4 homolog (yeast)                | MED4          | chr13q14.2       | Hs.181112 | 29079    |  |  | 0.013299 | -0.63 |
| 220199_s_at  | hypothetical protein FLJ12806                                                         | FLJ12806      | chr1q41          | Hs.6236   | 64853    |  |  | 0.002973 | -0.63 |
| 224866_at    | male sterility domain containing 2                                                    | MLSTD2        | chr11p15.2       | Hs.501991 | 84188    |  |  | 0.011290 | -0.63 |
| 202163_s_at  | CCR4-NOT transcription complex, subunit 8                                             | CNOT8         | chr5q31-q33      | Hs.26703  | 9337     |  |  | 0.013139 | -0.63 |
| 1558233_s_at | Activating transcription factor 1                                                     | ATF1          | chr12q13         | Hs.435267 | 466      |  |  | 0.022006 | -0.63 |
| 224151_s_at  | adenylate kinase 3                                                                    | AK3           | chr9p24.1-p24.3  | Hs.493362 | 50808    |  |  | 0.023657 | -0.63 |
| 227934_at    | Karyopherin alpha 5 (importin alpha 6)                                                | KPNA5         | chr6q22.1        | Hs.182971 | 3841     |  |  | 0.040212 | -0.63 |
| 217437_s_at  | transforming, acidic coiled-coil containing protein 1                                 | TACC1         | chr8p11          | Hs.279245 | 6867     |  |  | 0.048906 | -0.63 |
| 215143_at    | Hypothetical protein FLJ36166                                                         | FLJ36166      | chr7q22.1        | Hs.148768 | 349152   |  |  | 0.007134 | -0.63 |
| 210612_s_at  | synaptojanin 2                                                                        | SYNJ2         | chr6q25.3        | Hs.434494 | 8871     |  |  | 0.040556 | -0.63 |
| 208666_s_at  | suppression of tumorigenicity 13 (colon carcinoma) (Hsp70 interacting p               | ST13          | chr22q13.2       | Hs.546303 | 6767     |  |  | 0.007776 | -0.63 |
| 203102_s_at  | mannosyl (alpha-1,6-)-glycoprotein beta-1,2-N-acetylglucosaminyltransf                | MGAT2         | chr14q21         | Hs.93338  | 4247     |  |  | 0.010816 | -0.63 |
| 222602_at    | hypothetical protein FLJ10808                                                         | FLJ10808      | chr4q13.2        | Hs.212774 | 55236    |  |  | 0.008312 | -0.63 |
| 232305_at    | 3-hydroxymethyl-3-methylglutaryl-Coenzyme A lyase-like 1                              | HMGCLL1       | chr6p12.1        | Hs.147054 | 54511    |  |  | 0.036937 | -0.63 |
| 227187_at    | Cas-Br-M (murine) ecotropic retroviral transforming sequence-like 1                   | CBLL1         | chr7q31.1        | Hs.432792 | 79872    |  |  | 0.021498 | -0.63 |
| 230274_s_at  | Rabaptin, RAB GTPase binding effector protein 1                                       | RABEP1        | chr17p13.2       | Hs.551518 | 9135     |  |  | 0.020547 | -0.63 |
| 1554433_a_at | zinc finger protein 146                                                               | ZNF146        | chr19q13.1       | Hs.301819 | 7705     |  |  | 0.013651 | -0.63 |
| 231532_at    | Neural cell adhesion molecule 1                                                       | NCAM1         | chr11q23.1       | Hs.503878 | 4684     |  |  | 0.039139 | -0.63 |
| 212829_at    | CDNA FLJ13267 fis, clone OVARC1000964 /// CDNA FLJ13267 fis, clone OVARC1000964       |               |                  | Hs.57079  |          |  |  | 0.035928 | -0.63 |
| 222631_at    | phosphatidylinositol 4-kinase type-II beta                                            | PI4K2B        | chr4p15.2        | Hs.443733 | 55300    |  |  | 0.001565 | -0.63 |
| 201788_at    | DEAD (Asp-Glu-Ala-Asp) box polypeptide 42                                             | DDX42         | chr17q23.3       | Hs.8765   | 11325    |  |  | 0.040100 | -0.63 |
| 201051_at    | Acidic (leucine-rich) nuclear phosphoprotein 32 family, member A                      | ANP32A        | chr15q22.3-q23   | Hs.458747 | 8125     |  |  | 0.022909 | -0.63 |
| 229549_at    | Opsin 1 (cone pigments), short-wave-sensitive (color blindness, tritan)               | OPN1SW        | chr7q31.3-q32    | Hs.550465 | 611      |  |  | 0.019449 | -0.63 |
| 202842_s_at  | DnaJ (Hsp40) homolog, subfamily B, member 9                                           | DNAJB9        | chr7q31 14q24.2  | Hs.6790   | 4189     |  |  | 0.008664 | -0.63 |
| 204235_s_at  | GULP, engulfment adaptor PTB domain containing 1                                      | GULP1         | chr2q32.3-q33    | Hs.470887 | 51454    |  |  | 0.011080 | -0.63 |
| 201317_s_at  | proteasome (prosome, macropain) subunit, alpha type, 2                                | PSMA2         | chr7p14.1        | Hs.333786 | 5683     |  |  | 0.011730 | -0.63 |
| 226853_at    | BMP2 inducible kinase                                                                 | BMP2K         | chr4q21.21       | Hs.146551 | 55589    |  |  | 0.034064 | -0.63 |
| 205934_at    | phospholipase C-like 1                                                                | PLCL1         | chr2q33          | Hs.153322 | 5334     |  |  | 0.017911 | -0.63 |

|              |                                                                                                    |           |                  |           |        |          |       |
|--------------|----------------------------------------------------------------------------------------------------|-----------|------------------|-----------|--------|----------|-------|
| 218195_at    | chromosome 6 open reading frame 211                                                                | C6orf211  | chr6q25.1        | Hs.15929  | 79624  | 0.001503 | -0.63 |
| 221064_s_at  | chromosome 16 open reading frame 28                                                                | C16orf28  | chr16p13.3       | Hs.161279 | 65259  | 0.032911 | -0.63 |
| 225324_at    | chromosome 20 open reading frame 155                                                               | C20orf155 | chr20p13-p12.3   | Hs.224764 | 54675  | 0.008347 | -0.64 |
| 226952_at    | ELL associated factor 1                                                                            | EAF1      | chr3p25.1        | Hs.474479 | 85403  | 0.035179 | -0.64 |
| 226641_at    | Hypothetical protein DKFZp434D2328                                                                 | LOC91526  | chr2q33.1        | Hs.432706 | 91526  | 0.002434 | -0.64 |
| 225326_at    | RNA binding motif protein 27                                                                       | RBM27     | chr5q32          | Hs.61441  | 54439  | 0.020472 | -0.64 |
| 209109_s_at  | tetraspanin 6                                                                                      | TSPAN6    | chrXq22          | Hs.43233  | 7105   | 0.048406 | -0.64 |
| 201456_s_at  | BUB3 budding uninhibited by benzimidazoles 3 homolog (yeast)                                       | BUB3      | chr10q26         | Hs.418533 | 9184   | 0.037164 | -0.64 |
| 235762_at    | Taste receptor, type 2, member 14                                                                  | TAS2R14   | chr12p13         | Hs.552595 | 50840  | 0.001433 | -0.64 |
| 223296_at    | mitochondrial carrier protein                                                                      | MGC4399   | chr1p36.22       | Hs.443826 | 84275  | 0.006839 | -0.64 |
| 226374_at    | Full-length cDNA clone CSODF012YG01 of Fetal brain of Homo sapiens (human)                         |           |                  | Hs.7956   |        | 0.035237 | -0.64 |
| 203531_at    | Cullin 5                                                                                           | CUL5      | chr11q22-q23     | Hs.440320 | 8065   | 0.000239 | -0.64 |
| 202422_s_at  | acyl-CoA synthetase long-chain family member 4                                                     | ACSL4     | chrXq22.3-q23    | Hs.268785 | 2182   | 0.022481 | -0.64 |
| 230573_at    | serum/glucocorticoid regulated kinase 2                                                            | SGK2      | chr20q32         | Hs.472793 | 10110  | 0.038180 | -0.64 |
| 218297_at    | chromosome 10 open reading frame 97                                                                | C10orf97  | chr10p13         | Hs.158870 | 80013  | 0.000885 | -0.64 |
| 202165_at    | protein phosphatase 1, regulatory (inhibitor) subunit 2                                            | PPP1R2    | chr3q29          | Hs.184840 | 5504   | 0.038999 | -0.64 |
| 241898_at    | Transcribed locus, moderately similar to XP_517655.1 similar to KIAA0825 protein [Pan troglodytes] |           |                  | Hs.351126 |        | 0.033353 | -0.64 |
| 229298_at    | Kelch repeat and BTB (POZ) domain containing 7                                                     | KBTD7     | chr13q14.11      | Hs.63841  | 84078  | 0.003588 | -0.64 |
| 218625_at    | neuritin 1                                                                                         | NRN1      | chr6p25.1        | Hs.103291 | 51299  | 0.046021 | -0.64 |
| 212298_at    | neuropilin 1                                                                                       | NRP1      | chr10p12         | Hs.131704 | 8829   | 0.021072 | -0.64 |
| 239024_at    | Zinc finger protein 148 (pHZ-52)                                                                   | ZNF148    | chr3q21          | Hs.380334 | 7707   | 0.046162 | -0.64 |
| 204313_s_at  | cAMP responsive element binding protein 1                                                          | CREB1     | chr2q34          | Hs.516646 | 1385   | 0.032801 | -0.64 |
| 222562_s_at  | tankyrase, TRF1-interacting ankyrin-related ADP-ribose polymerase 2                                | TNKS2     | chr10q23.3       | Hs.329327 | 80351  | 0.045780 | -0.64 |
| 225084_at    | SEC10-like 1 (S. cerevisiae)                                                                       | SEC10L1   | chr14q22.3       | Hs.365863 | 10640  | 0.007475 | -0.64 |
| 201916_s_at  | SEC63-like (S. cerevisiae)                                                                         | SEC63     | chr6q21          | Hs.529957 | 11231  | 0.019129 | -0.64 |
| 240095_at    | Transcribed locus                                                                                  |           |                  | Hs.129636 |        | 0.037787 | -0.64 |
| 222614_at    | chromosome 21 open reading frame 6                                                                 | C21orf6   | chr21q22.11      | Hs.34136  | 10069  | 0.039543 | -0.64 |
| 219232_s_at  | egl nine homolog 3 (C. elegans)                                                                    | EGLN3     | chr14q13.1       | Hs.135507 | 112399 | 0.041717 | -0.64 |
| 213183_s_at  | Cyclin-dependent kinase inhibitor 1C (p57, Kip2)                                                   | CDKN1C    | chr11p15.5       | Hs.106070 | 1028   | 0.039015 | -0.64 |
| 202691_at    | small nuclear ribonucleoprotein D1 polypeptide 16kDa                                               | SNRPD1    | chr18q11.2       | Hs.464734 | 6632   | 0.010196 | -0.65 |
| 1557181_s_at | similar to expressed sequence AI593442                                                             | LOC39994  | chr11q22.3       | Hs.172982 | 399947 | 0.024542 | -0.65 |
| 221778_at    | KIAA1718 protein                                                                                   | KIAA1718  | chr7q34          | Hs.308710 | 80853  | 0.039398 | -0.65 |
| 235698_at    | zinc finger protein 90 homolog (mouse)                                                             | ZFP90     | chr16q22.1       | Hs.461074 | 146198 | 0.004310 | -0.65 |
| 235787_at    | Cell division cycle 37 homolog (S. cerevisiae)-like 1                                              | CDC37L1   |                  | Hs.493361 | 55664  | 0.005455 | -0.65 |
| 203869_at    | ubiquitin specific protease 46                                                                     | USP46     | chr4q12          | Hs.331478 | 64854  | 0.014210 | -0.65 |
| 1567457_at   | Ras-related C3 botulinum toxin substrate 1 (rho family, small GTP binding protein)                 | RAC1      | chr7p22          | Hs.413812 | 5879   | 0.009465 | -0.65 |
| 238497_at    | hypothetical protein MGC17839                                                                      | MGC17839  | chr11q23.3       | Hs.380228 | 219902 | 0.004705 | -0.65 |
| 206302_s_at  | nudix (nucleoside diphosphate linked moiety X)-type motif 4                                        | NUDT4     | chr12q21         | Hs.506325 | 11163  | 0.025888 | -0.65 |
| 1558964_at   | FAT tumor suppressor homolog 3 (Drosophila)                                                        | FAT3      | chr11q21         | Hs.98523  | 120114 | 0.000482 | -0.65 |
| 201634_s_at  | outer mitochondrial membrane cytochrome b5                                                         | CYB5-M    | chr16q22.1       | Hs.461131 | 80777  | 0.027599 | -0.65 |
| 228480_at    | VAMP (vesicle-associated membrane protein)-associated protein A, 33kDa                             | VAPA      | chr18p11.22      | Hs.165195 | 9218   | 0.021323 | -0.65 |
| 223022_s_at  | chromosome 6 open reading frame 55                                                                 | C6orf55   | chr6q24.1        | Hs.431367 | 51534  | 0.014877 | -0.65 |
| 218252_at    | cytoskeleton associated protein 2                                                                  | CKAP2     | chr13q14         | Hs.444028 | 26586  | 0.002982 | -0.65 |
| 212286_at    | ankyrin repeat domain 12                                                                           | ANKRD12   | chr18p11.22      | Hs.464585 | 23253  | 0.010755 | -0.65 |
| 213718_at    | RNA binding motif protein 4                                                                        | RBM4      | chr11q13         | Hs.533712 | 5936   | 0.030657 | -0.65 |
| 226112_at    | sarcoglycan, beta (43kDa dystrophin-associated glycoprotein)                                       | SGCB      | chr4q12          | Hs.438953 | 6443   | 0.013099 | -0.65 |
| 225805_at    | Heterogeneous nuclear ribonucleoprotein U (scaffold attachment factor)                             | HNRPU     | chr1q44          | Hs.166463 | 3192   | 0.003516 | -0.65 |
| 230194_at    | Leucine-rich PPR-motif containing                                                                  | LRPPRC    | chr2p21          | Hs.368084 | 10128  | 0.016611 | -0.65 |
| 210675_s_at  | protein tyrosine phosphatase, receptor type, R                                                     | PTPRR     | chr12q15         | Hs.506076 | 5801   | 0.043762 | -0.65 |
| 238418_at    | solute carrier family 35, member B4                                                                | SLC35B4   | chr7q33          | Hs.490181 | 84912  | 0.046062 | -0.65 |
| 218085_at    | chromatin modifying protein 5                                                                      | CHMP5     | chr9p13.3        | Hs.415534 | 51510  | 0.005035 | -0.65 |
| 212289_at    | ankyrin repeat domain 12                                                                           | ANKRD12   | chr18p11.22      | Hs.464585 | 23253  | 0.003913 | -0.65 |
| 223089_at    | transmembrane protein vezatin                                                                      | VEZATIN   | chr12q22         | Hs.24135  | 55591  | 0.007379 | -0.65 |
| 218090_s_at  | WD repeat domain 11                                                                                | WDR11     | chr10q26         | Hs.144447 | 55717  | 0.034418 | -0.65 |
| 225640_at    | hypothetical gene supported by AK091718                                                            | LOC40150  | chr9p13.2        | Hs.446271 | 401504 | 0.017648 | -0.65 |
| 206381_at    | sodium channel, voltage-gated, type II, alpha 2                                                    | SCN2A2    | chr2q23-q24      | Hs.470470 | 6326   | 0.038710 | -0.65 |
| 200040_at    | KH domain containing, RNA binding, signal transduction associated 1 ///                            | KHDRBS1   | chr1p32          | Hs.445893 | 10657  | 0.011866 | -0.65 |
| 229803_s_at  | AF034176 Human mRNA (Tripodis and Ragoussis) Homo sapiens cDNA clone ntcon5 contig, mRNA seq       |           |                  | Hs.549673 |        | 0.049315 | -0.65 |
| 236600_at    | spastic paraplegia 20, spartin (Troyer syndrome)                                                   | SPG20     | chr13q13.3       | Hs.440414 | 23111  | 0.006733 | -0.65 |
| 1559265_at   | FLJ45187 protein                                                                                   | FLJ45187  | chr10p12.31      | Hs.350848 | 387640 | 0.002651 | -0.65 |
| 214658_at    | transmembrane emp24 protein transport domain containing 7                                          | TMED7     | chr5q22.3        | Hs.508765 | 51014  | 0.015508 | -0.65 |
| 202536_at    | chromatin modifying protein 2B                                                                     | CHMP2B    | chr3p12.1        | Hs.476930 | 25978  | 0.004052 | -0.65 |
| 1554099_a_at | spindlin family, member 3                                                                          | SPIN3     | chrXp11.1        | Hs.522672 | 169981 | 0.041192 | -0.66 |
| 220495_s_at  | chromosome 5 open reading frame 14                                                                 | C5orf14   | chr5q31.1        | Hs.106534 | 79770  | 0.006881 | -0.66 |
| 225420_at    | glycerol-3-phosphate acyltransferase, mitochondrial                                                | GPAM      | chr10q25.2       | Hs.42586  | 57678  | 0.031052 | -0.66 |
| 209476_at    | thioredoxin domain containing                                                                      | TXNDC     | chr14q22.1       | Hs.125221 | 81542  | 0.009904 | -0.66 |
| 231804_at    |                                                                                                    |           |                  |           |        | 0.022390 | -0.66 |
| 222726_s_at  | SEC10-like 1 (S. cerevisiae)                                                                       | SEC10L1   | chr14q22.3       | Hs.365863 | 10640  | 0.006225 | -0.66 |
| 225340_s_at  | membrane component, chromosome 11, surface marker 1                                                | M11S1     | chr11p13         | Hs.471818 | 4076   | 0.004353 | -0.66 |
| 203543_s_at  | Kruppel-like factor 9                                                                              | KLF9      | chr9q13          | Hs.150557 | 687    | 0.027493 | -0.66 |
| 240974_at    | hypothetical LOC153959                                                                             | LOC153959 | chr6q14.1        | Hs.435465 | 153959 | 0.003599 | -0.66 |
| 244293_at    | Transcribed locus                                                                                  |           |                  | Hs.160893 |        | 0.029977 | -0.66 |
| 218789_s_at  | hypothetical protein FLJ20010                                                                      | FLJ20010  | chr11q14.2-q14.3 | Hs.91816  | 54494  | 0.001401 | -0.66 |
| 208689_s_at  | ribophorin II                                                                                      | RPN2      | chr20q12-q13.1   | Hs.370895 | 6185   | 0.027956 | -0.66 |

|              |                                                                                                        |          |                  |           |           |  |  |          |       |
|--------------|--------------------------------------------------------------------------------------------------------|----------|------------------|-----------|-----------|--|--|----------|-------|
| 232125_at    | CDNA FLJ34585 fis, clone KIDNE2008758                                                                  |          |                  |           | Hs.202577 |  |  | 0.026922 | -0.66 |
| 212168_at    | RNA binding motif protein 12                                                                           | RBM12    | chr20q11.21      | Hs.246413 | 10137     |  |  | 0.039475 | -0.66 |
| 231927_at    | Activating transcription factor 6                                                                      | ATF6     | chr1q22-q23      | Hs.492740 | 22926     |  |  | 0.011081 | -0.66 |
| 202118_s_at  | copine III                                                                                             | CPNE3    | chr8q21.3        | Hs.191219 | 8895      |  |  | 0.007346 | -0.66 |
| 205042_at    | glucosamine (UDP-N-acetyl)-2-epimerase/N-acetylmannosamine kinase                                      | GNE      | chr9p13.2        | Hs.5920   | 10020     |  |  | 0.044741 | -0.66 |
| 219726_at    | neurologin 3                                                                                           | NLGN3    | chrXq13.1        | Hs.438877 | 54413     |  |  | 0.022541 | -0.66 |
| 218230_at    | ADP-ribosylation factor interacting protein 1 (arfaptin 1)                                             | ARFIP1   | chr4q31.3        | Hs.416089 | 27236     |  |  | 0.014260 | -0.66 |
| 208643_s_at  | X-ray repair complementing defective repair in Chinese hamster cells 5                                 | (XRCC5   | chr2q35          | Hs.388739 | 7520      |  |  | 0.012841 | -0.66 |
| 225821_s_at  | KIAA1327 protein                                                                                       | KIAA1327 | chr4p16.1        | Hs.106204 | 57219     |  |  | 0.007883 | -0.66 |
| 203123_s_at  | solute carrier family 11 (proton-coupled divalent metal ion transporters)                              | SLC11A2  | chr12q13         | Hs.505545 | 4891      |  |  | 0.040104 | -0.66 |
| 212224_at    | aldehyde dehydrogenase 1 family, member A1                                                             | ALDH1A1  | chr9q21.13       | Hs.76392  | 216       |  |  | 0.021885 | -0.66 |
| 201017_at    | eukaryotic translation initiation factor 1A, X-linked                                                  | EIF1AX   | chrXp22.12       | Hs.522590 | 1964      |  |  | 0.038799 | -0.66 |
| 226073_at    | hypothetical protein LOC219854                                                                         | LOC21985 | chr11q24.2       | Hs.7626   | 219854    |  |  | 0.024955 | -0.66 |
| 212806_at    | KIAA0367                                                                                               | KIAA0367 | chr9q21.2        | Hs.262857 | 23273     |  |  | 0.015392 | -0.66 |
| 206806_at    | diacylglycerol kinase, iota                                                                            | DGKI     | chr7q32.3-q33    | Hs.242947 | 9162      |  |  | 0.030763 | -0.66 |
| 221185_s_at  | IQ motif containing G                                                                                  | IQCG     | chr3q29          | Hs.518536 | 84223     |  |  | 0.018268 | -0.66 |
| 218251_at    | MID1 interacting protein 1 (gastrulation specific G12-like (zebrafish))                                | MID1IP1  | chrXp11.4        | Hs.522605 | 58526     |  |  | 0.028150 | -0.67 |
| 223530_at    | tudor and KH domain containing                                                                         | TDRKH    | chr1q21          | Hs.144439 | 11022     |  |  | 0.034974 | -0.67 |
| 1560647_at   | TSPY-like 1                                                                                            | TSPYL1   | chr6q22-q23      | Hs.458358 | 7259      |  |  | 0.004226 | -0.67 |
| 238661_at    | Hypothetical gene supported by BX537900                                                                |          | chr8q12.3        | Hs.7023   | 441351    |  |  | 0.043967 | -0.67 |
| 228987_at    | Family with sequence similarity 49, member B                                                           | FAM49B   | chr8q24.21       | Hs.492869 | 51571     |  |  | 0.027375 | -0.67 |
| 232080_at    | HECT, C2 and WW domain containing E3 ubiquitin protein ligase 2                                        | HECW2    | chr2q32.3        | Hs.314436 | 57520     |  |  | 0.002557 | -0.67 |
| 235066_at    | microtubule-associated protein 4                                                                       | MAP4     | chr3p21          | Hs.517949 | 4134      |  |  | 0.025427 | -0.67 |
| 203905_at    | poly(A)-specific ribonuclease (deadenylation nuclease)                                                 | PARN     | chr16p13         | Hs.253197 | 5073      |  |  | 0.011876 | -0.67 |
| 1552619_a_at | anillin, actin binding protein (scraps homolog, Drosophila)                                            | ANLN     | chr7p15-p14      | Hs.62180  | 54443     |  |  | 0.007424 | -0.67 |
| 210156_s_at  | protein-L-isoaspartate (D-aspartate) O-methyltransferase                                               | PCMT1    | chr6q24-q25      | Hs.279257 | 5110      |  |  | 0.047643 | -0.67 |
| 213365_at    | similar to RIKEN cDNA 4933424N09 gene                                                                  | MGC16943 | chr16p12.3       | Hs.248437 | 112479    |  |  | 0.039706 | -0.67 |
| 218578_at    | hyperparathyroidism 2 (with jaw tumor)                                                                 | HRPT2    | chr1q25          | Hs.378996 | 79577     |  |  | 0.006950 | -0.67 |
| 225162_at    | SH3 domain protein D19                                                                                 | SH3D19   | chr4q31.3        | Hs.519018 | 152503    |  |  | 0.006092 | -0.67 |
| 235344_at    | Protein phosphatase 1A (formerly 2C), magnesium-dependent, alpha iso                                   | PPM1A    | chr14q23.1       | Hs.130036 | 5494      |  |  | 0.013476 | -0.67 |
| 219294_at    | chromosome 6 open reading frame 139                                                                    | C6orf139 | chr6p12.3        | Hs.88663  | 55166     |  |  | 0.031978 | -0.67 |
| 218696_at    | eukaryotic translation initiation factor 2-alpha kinase 3                                              | EIF2AK3  | chr2p12          | Hs.434326 | 9451      |  |  | 0.016791 | -0.67 |
| 239435_x_at  | apical protein 2                                                                                       | APXL2    | chr5q23.3        | Hs.519574 | 134549    |  |  | 0.023088 | -0.67 |
| 202211_at    | ADP-ribosylation factor GTPase activating protein 3                                                    | ARFGAP3  | chr22q13.2-q13.3 | Hs.13014  | 26286     |  |  | 0.018460 | -0.67 |
| 219979_s_at  | hypothetical protein HSPC138                                                                           | HSPC138  | chr11q14.2       | Hs.283322 | 51501     |  |  | 0.019113 | -0.67 |
| 209633_at    | protein phosphatase 2 (formerly 2A), regulatory subunit B'', alpha                                     | PPP2R3A  | chr3q22.1        | Hs.518155 | 5523      |  |  | 0.045780 | -0.67 |
| 212985_at    | Full-length cDNA clone CSODC015YK09 of Neuroblastoma Cot 25-normalized of Homo sapiens (human)         |          |                  | Hs.507486 |           |  |  | 0.029418 | -0.67 |
| 205121_at    | sarcoglycan, beta (43kDa dystrophin-associated glycoprotein)                                           | SGCB     | chr4q12          | Hs.438953 | 6443      |  |  | 0.020270 | -0.67 |
| 235258_at    | DCP2 decapping enzyme homolog (S. cerevisiae)                                                          | DCP2     | chr5q22.2        | Hs.443875 | 167227    |  |  | 0.006857 | -0.67 |
| 226742_at    | Transcribed locus, moderately similar to XP_512541.1 similar to hypothetical protein [Pan troglodytes] |          |                  | Hs.432984 |           |  |  | 0.024623 | -0.67 |
| 222816_s_at  | zinc finger, CCHC domain containing 2                                                                  | ZCCHC2   | chr18q21.33      | Hs.114191 | 54877     |  |  | 0.009062 | -0.67 |
| 243405_at    | Thioredoxin domain containing 5                                                                        | TXNDC5   | chr6p24.3        | Hs.150837 | 81567     |  |  | 0.001517 | -0.67 |
| 211505_s_at  | staufen, RNA binding protein (Drosophila)                                                              | STAU     | chr20p13.1       | Hs.370187 | 6780      |  |  | 0.036128 | -0.67 |
| 227942_s_at  | postsynaptic protein CRIPT                                                                             | CRIP1    | chr2p21          | Hs.534380 | 9419      |  |  | 0.017850 | -0.67 |
| 212746_s_at  | KARP-1-binding protein                                                                                 | KAB      | chr1q44          | Hs.533635 | 9859      |  |  | 0.026724 | -0.67 |
| 231610_at    | Homo sapiens, clone IMAGE:5272626, mRNA                                                                |          |                  | Hs.511837 |           |  |  | 0.039298 | -0.68 |
| 224413_s_at  | BBP-like protein 1 /// BBP-like protein 1                                                              | BLP1     | chr8p11.23       | Hs.7471   | 83877     |  |  | 0.005787 | -0.68 |
| 201133_s_at  | praja 2, RING-H2 motif containing                                                                      | PJA2     | chr5q21.3        | Hs.483036 | 9867      |  |  | 0.014848 | -0.68 |
| 228375_at    |                                                                                                        |          |                  |           |           |  |  | 0.027233 | -0.68 |
| 224734_at    |                                                                                                        |          |                  |           |           |  |  | 0.017909 | -0.68 |
| 222566_at    | suppressor of variegation 4-20 homolog 1 (Drosophila)                                                  | SUV420H1 | chr11q13.2       | Hs.503001 | 51111     |  |  | 0.035069 | -0.68 |
| 213047_x_at  | SET translocation (myeloid leukemia-associated)                                                        | SET      | chr9q34          | Hs.436687 | 6418      |  |  | 0.009672 | -0.68 |
| 230684_at    | Hypothetical protein BC004923                                                                          | LOC85865 | chr7q21.13       | Hs.489052 | 85865     |  |  | 0.015245 | -0.68 |
| 226391_at    | NADH dehydrogenase (ubiquinone) 1 beta subcomplex, 2, 8kDa                                             | NDUFB2   | chr7q34          | Hs.324250 | 4708      |  |  | 0.018997 | -0.68 |
| 225133_at    | Kruppel-like factor 3 (basic)                                                                          | KLF3     | chr4p14          | Hs.298658 | 51274     |  |  | 0.011236 | -0.68 |
| 219696_at    | hypothetical protein FLJ20054                                                                          | FLJ20054 | chr1q31.3        | Hs.497279 | 54530     |  |  | 0.016432 | -0.68 |
| 225835_at    | solute carrier family 12 (sodium/potassium/chloride transporters), mem                                 | SLC12A2  | chr5q23.3        | Hs.162585 | 6558      |  |  | 0.000011 | -0.68 |
| 222552_at    | golgi transport 1 homolog B (S. cerevisiae)                                                            | GOLT1B   | chr12p12.1       | Hs.62275  | 51026     |  |  | 0.037509 | -0.68 |
| 212204_at    | DKFZP564G2022 protein                                                                                  | DKFZP564 | chr15q15.1       | Hs.511138 | 25963     |  |  | 0.010602 | -0.68 |
| 225098_at    | Abl interactor 2                                                                                       | ABI2     | chr2q33          | Hs.471156 | 10152     |  |  | 0.019263 | -0.68 |
| 220608_s_at  |                                                                                                        |          |                  |           |           |  |  | 0.028099 | -0.68 |
| 222603_at    | KIAA1815                                                                                               | KIAA1815 | chr9p24          | Hs.87128  | 79956     |  |  | 0.020818 | -0.68 |
| 219279_at    | dedicator of cytokinesis 10                                                                            | DOCK10   | chr2q36.3        | Hs.46578  | 55619     |  |  | 0.038103 | -0.68 |
| 235394_at    | Phospholipase A2-activating protein                                                                    | PLAA     | chr9p21          | Hs.27182  | 9373      |  |  | 0.025617 | -0.68 |
| 235222_x_at  | baculoviral IAP repeat-containing 4                                                                    | BIRC4    | chrXq25          | Hs.356076 | 331       |  |  | 0.021977 | -0.68 |
| 223204_at    | hypothetical protein DKFZp434L142                                                                      | DKFZp434 | chr4q32.1        | Hs.323583 | 51313     |  |  | 0.016351 | -0.68 |
| 222395_s_at  | hypothetical protein FLJ13855                                                                          | FLJ13855 | chr17q21.32      | Hs.514297 | 65264     |  |  | 0.040604 | -0.68 |
| 1555780_a_at | Ras homolog enriched in brain                                                                          | RHEB     | chr7q36          | Hs.283521 | 6009      |  |  | 0.036964 | -0.68 |
| 221268_s_at  | sphingosine-1-phosphate phosphatase 1 /// sphingosine-1-phosphate p                                    | SGPP1    | chr14q23.2       | Hs.24678  | 81537     |  |  | 0.014831 | -0.68 |
| 212306_at    | cytoplasmic linker associated protein 2                                                                | CLASP2   | chr3p23          | Hs.108614 | 23122     |  |  | 0.022659 | -0.68 |
| 201411_s_at  | pleckstrin homology domain containing, family B (evectins) member 2                                    | PLEKHB2  | chr2q21.1        | Hs.469944 | 55041     |  |  | 0.016096 | -0.68 |
| 224605_at    | HCV F-transacted protein 1                                                                             | LOC40115 | chr4q26          | Hs.173705 | 401152    |  |  | 0.026622 | -0.68 |
| 209817_at    | protein phosphatase 3 (formerly 2B), catalytic subunit, beta isoform (cal                              | PPP3CB   | chr10q21-q22     | Hs.500067 | 5532      |  |  | 0.000150 | -0.68 |
| 211563_s_at  | chromosome 19 open reading frame 2                                                                     | C19orf2  | chr19q12         | Hs.466391 | 8725      |  |  | 0.020301 | -0.68 |



|              |                                                                                                     |            |                   |           |             |          |       |
|--------------|-----------------------------------------------------------------------------------------------------|------------|-------------------|-----------|-------------|----------|-------|
| 2028810_at   | DnaJ (Hsp40) homolog, subfamily B, member 6                                                         | DNAJB6     | chr7q36.3         | Hs.490745 | 10049       | 0.032140 | -0.68 |
| 224739_at    | pim-3 oncogene                                                                                      | PIM3       | chr22q13          | Hs.530381 | 415116      | 0.040496 | -0.68 |
| 232103_at    | 3'(2'), 5'-bisphosphate nucleotidase 1                                                              | BPNT1      | chr1q41           | Hs.406134 | 10380       | 0.020639 | -0.69 |
| 215707_s_at  | prion protein (p27-30) (Creutzfeld-Jakob disease, Gerstmann-Strausler-S                             | PRNP       | chr20pter-p12     | Hs.472010 | 5621        | 0.027633 | -0.69 |
| 204621_s_at  | nuclear receptor subfamily 4, group A, member 2                                                     | NR4A2      | chr2q22-q23       | Hs.165258 | 4929        | 0.019788 | -0.69 |
| 213461_at    | cleavage and polyadenylation specific factor 5, 25 kDa                                              | CPSF5      | chr16q12.2        | Hs.528834 | 11051       | 0.026782 | -0.69 |
| 231896_s_at  | density-regulated protein                                                                           | DENR       | chr12q24.31       | Hs.22393  | 8562        | 0.010895 | -0.69 |
| 218570_at    | kelch repeat and BTB (POZ) domain containing 4                                                      | KBTD4      | chr11p11.2        | Hs.440695 | 55709       | 0.011223 | -0.69 |
| 1555274_a_at | selenoprotein I                                                                                     | SELI       | chr2p23.3         | Hs.189073 | 85465       | 0.010546 | -0.69 |
| 202710_at    | BET1 homolog (S. cerevisiae)                                                                        | BET1       | chr7q21.1-q22     | Hs.489132 | 10282       | 0.029294 | -0.69 |
| 222525_s_at  | hypothetical protein FLJ10853                                                                       | FLJ10853   | chr8p21.1         | Hs.445512 | 55246       | 0.031674 | -0.69 |
| 218637_at    | hypothetical protein IMPACT                                                                         | IMPACT     | chr18q11.2-q12.1  | Hs.515317 | 55364       | 0.019894 | -0.69 |
| 202538_s_at  | chromatin modifying protein 2B                                                                      | CHMP2B     | chr3p12.1         | Hs.476930 | 25978       | 0.010532 | -0.69 |
| 209425_at    |                                                                                                     |            |                   |           |             | 0.007280 | -0.69 |
| 202820_at    | aryl hydrocarbon receptor                                                                           | AHR        | chr7p15           | Hs.171189 | 196         | 0.000736 | -0.69 |
| 218276_s_at  | salvador homolog 1 (Drosophila)                                                                     | SAV1       | chr14q13-q23      | Hs.257341 | 60485       | 0.018676 | -0.69 |
| 209632_at    | protein phosphatase 2 (formerly 2A), regulatory subunit B', alpha                                   | PPP2R3A    | chr3q22.1         | Hs.518155 | 5523        | 0.000683 | -0.69 |
| 243904_at    | CDNA clone IMAGE:5287121, partial cds                                                               |            |                   | Hs.375744 |             | 0.036069 | -0.69 |
| 216640_s_at  | protein disulfide isomerase-associated 6                                                            | PDIA6      | chr2p25.1         | Hs.212102 | 10130       | 0.031136 | -0.69 |
| 201777_s_at  | KIAA0494 gene product                                                                               | KIAA0494   | chr1pter-p22.1    | Hs.100874 | 9813        | 0.014054 | -0.69 |
| 226259_at    | SEC15-like 1 (S. cerevisiae)                                                                        | SEC15L1    | chr10q23.33       | Hs.292097 | 54536       | 0.036135 | -0.69 |
| 201554_x_at  | glycogenin                                                                                          | GYG        | chr3q24-q25.1     | Hs.477892 | 2992        | 0.002217 | -0.69 |
| 235819_at    | Similar to transcription factor BTF3                                                                | MGC23908   | chr1p32.3         | Hs.429839 | 91408       | 0.022265 | -0.69 |
| 222587_s_at  | UDP-N-acetyl-alpha-D-galactosamine:polypeptide N-acetylgalactosamin                                 | GALNT7     | chr4q31.1         | Hs.127407 | 51809       | 0.013740 | -0.69 |
| 231213_at    | phosphodiesterase 1A, calmodulin-dependent                                                          | PDE1A      | chr2q32.1         | Hs.416061 | 5136        | 0.014084 | -0.69 |
| 236576_at    | Transcribed locus                                                                                   |            |                   | Hs.21375  |             | 0.046003 | -0.69 |
| 204125_at    | NADH dehydrogenase (ubiquinone) 1 alpha subcomplex, assembly facto                                  | NDUFAF1    | chr15q11.2-q21.1  | Hs.106529 | 51103       | 0.004412 | -0.69 |
| 231489_x_at  | Transcribed locus, weakly similar to NP_061913.2 elongation protein 4 homolog (S. cerevisiae) [Homc |            |                   | Hs.13284  |             | 0.017848 | -0.69 |
| 209397_at    | malic enzyme 2, NAD(+)-dependent, mitochondrial                                                     | ME2        | chr6p25-p24 18c   | Hs.233119 | 4200        | 0.009737 | -0.69 |
| 212468_at    | sperm associated antigen 9                                                                          | SPAG9      | chr17q21.33       | Hs.463439 | 9043        | 0.023805 | -0.69 |
| 224812_at    | 3-hydroxyisobutyrate dehydrogenase                                                                  | HIBADH     | chr7p15.2         | Hs.406758 | 11112       | 0.001925 | -0.70 |
| 1558101_at   | Full length insert cDNA clone ZD69D05                                                               |            |                   | Hs.379253 |             | 0.035179 | -0.70 |
| 243998_at    | Hypothetical protein MGC45562                                                                       | MGC45562   | chr17q21.2        | Hs.6920   | 125113      | 0.028128 | -0.70 |
| 226050_at    | chromosome 13 open reading frame 11                                                                 | C13orf11   | chr13q34          | Hs.317593 | 55002       | 0.007017 | -0.70 |
| 219094_at    | armadillo repeat containing 8                                                                       | ARMC8      | chr3q22.3         | Hs.266826 | 25852       | 0.005243 | -0.70 |
| 209814_at    | zinc finger protein 330                                                                             | ZNF330     |                   | Hs.120766 | 27309       | 0.009240 | -0.70 |
| 222656_at    | hypothetical protein FLJ11011                                                                       | FLJ11011   | chr8q21.11        | Hs.492031 | 55284       | 0.014423 | -0.70 |
| 226034_at    | Homo sapiens, clone IMAGE:3881549, mRNA                                                             |            |                   | Hs.346735 |             | 0.029262 | -0.70 |
| 221727_at    | activated RNA polymerase II transcription cofactor 4 /// similar to Activa                          | PC4 /// LO | chr5p13.3 /// chr | Hs.448070 | 10923 /// 4 | 0.014580 | -0.70 |
| 226370_at    | kelch-like 15 (Drosophila)                                                                          | KLHL15     | chrXp22.1-p21     | Hs.495854 | 80311       | 0.010795 | -0.70 |
| 225332_at    | Keratin associated protein 4-7                                                                      | KRTAP4-7   | chr17q12-q21      | Hs.549512 | 85287       | 0.021715 | -0.70 |
| 237983_at    |                                                                                                     |            |                   |           |             | 0.038967 | -0.70 |
| 200927_s_at  | RAB14, member RAS oncogene family                                                                   | RAB14      | chr9q32-q34.11    | Hs.371563 | 51552       | 0.016550 | -0.70 |
| 227525_at    | glucocorticoid induced transcript 1                                                                 | GLCC1      | chr7p21.3         | Hs.131673 | 113263      | 0.022672 | -0.70 |
| 225295_at    | solute carrier family 39 (zinc transporter), member 10                                              | SLC39A10   | chr2q32.3         | Hs.413434 | 57181       | 0.021915 | -0.70 |
| 238856_s_at  | Pantothenate kinase 2 (Hallervorden-Spatz syndrome)                                                 | PANK2      | chr20p13          | Hs.516859 | 80025       | 0.001773 | -0.70 |
| 213882_at    | Beta-amyloid binding protein precursor                                                              | BBP        | chr1p31.3         | Hs.276876 | 83941       | 0.007701 | -0.70 |
| 201939_at    | polo-like kinase 2 (Drosophila)                                                                     | PLK2       | chr5q12.1-q13.2   | Hs.398157 | 10769       | 0.048603 | -0.70 |
| 225619_at    | hypothetical protein FLJ30046                                                                       | FLJ30046   | chr13q22.3        | Hs.349955 | 122060      | 0.026913 | -0.70 |
| 1561242_at   |                                                                                                     |            |                   |           |             | 0.032510 | -0.70 |
| 221858_at    | TBC1 domain family, member 12                                                                       | TBC1D12    | chr10q23.33       | Hs.500598 | 23232       | 0.000829 | -0.70 |
| 225416_at    | Ring finger protein 12                                                                              | RNF12      | chrXq13-q21       | Hs.122121 | 51132       | 0.037942 | -0.70 |
| 223215_s_at  | chromosome 14 open reading frame 100                                                                | C14orf100  | chr14q23.1        | Hs.446850 | 51528       | 0.002793 | -0.70 |
| 212373_at    | fem-1 homolog b (C. elegans)                                                                        | FEM1B      | chr15q22          | Hs.362733 | 10116       | 0.021354 | -0.70 |
| 225048_at    | PHD finger protein 10                                                                               | PHF10      | chr6q27           | Hs.435933 | 55274       | 0.029875 | -0.70 |
| 211931_s_at  | heterogeneous nuclear ribonucleoprotein A3 pseudogene 1 /// heterog                                 | HNRPA3P1   | chr10q11.21 /// c | Hs.524276 | 10151 /// 2 | 0.015842 | -0.70 |
| 1552879_a_at | atonal homolog 7 (Drosophila)                                                                       | ATOH7      | chr10q21.3        | Hs.175396 | 220202      | 0.016309 | -0.71 |
| 219048_at    | phosphatidylinositol glycan, class N                                                                | PIGN       | chr18q21.33       | Hs.157031 | 23556       | 0.003767 | -0.71 |
| 201436_at    | eukaryotic translation initiation factor 4E                                                         | EIF4E      | chr4q21-q25       | Hs.249718 | 1977        | 0.020066 | -0.71 |
| 225897_at    | Myristoylated alanine-rich protein kinase C substrate                                               | MARCKS     | chr6q22.2         | Hs.519909 | 4082        | 0.033961 | -0.71 |
| 218967_s_at  | phosphotriesterase related                                                                          | PTER       | chr10p12          | Hs.444321 | 9317        | 0.032377 | -0.71 |
| 221452_s_at  | transmembrane protein 14B /// transmembrane protein 14E                                             | TMEM14B    | chr6p25.1-p23     | Hs.273077 | 81853       | 0.020952 | -0.71 |
| 209175_at    | SEC23 interacting protein                                                                           | SEC23IP    | chr10q25-q26      | Hs.435004 | 11196       | 0.004645 | -0.71 |
| 221472_at    | tumor differentially expressed 1                                                                    | TDE1       | chr20q13.1-13.3   | Hs.272168 | 10955       | 0.039999 | -0.71 |
| 213663_s_at  | hypothetical LOC389275                                                                              | LOC389275  | chr5p15.1         | Hs.549332 | 389275      | 0.024395 | -0.71 |
| 217821_s_at  | WW domain binding protein 11                                                                        | WBP11      | chr12p12.3        | Hs.524281 | 51729       | 0.015986 | -0.71 |
| 213549_at    | Solute carrier family 18 (vesicular monoamine), member 2                                            | SLC18A2    | chr10q25          | Hs.369009 | 6571        | 0.005651 | -0.71 |
| 221531_at    | recombination protein REC14                                                                         | REC14      | chr15q25.1        | Hs.513055 | 80349       | 0.026469 | -0.71 |
| 228731_at    | CDNA clone IMAGE:5273964, partial cds                                                               |            |                   | Hs.24321  |             | 0.033824 | -0.71 |
| 212213_x_at  | optic atrophy 1 (autosomal dominant)                                                                | OPA1       | chr3q28-q29 3q2   | Hs.478708 | 4976        | 0.010605 | -0.71 |
| 209735_at    | ATP-binding cassette, sub-family G (WHITE), member 2                                                | ABCG2      | chr4q22           | Hs.480218 | 9429        | 0.045574 | -0.71 |
| 217826_s_at  | ubiquitin-conjugating enzyme E2, J1 (UBC6 homolog, yeast)                                           | UBE2J1     | chr6q15           | Hs.163776 | 51465       | 0.027672 | -0.71 |
| 1553111_a_at | kelch repeat and BTB (POZ) domain containing 6                                                      | KBTD6      | chr13q14.11       | Hs.534040 | 89890       | 0.006059 | -0.71 |
| 200866_s_at  | prosaposin (variant Gaucher disease and variant metachromatic leukody                               | PSAP       | chr10q21-q22      | Hs.523004 | 5660        | 0.029873 | -0.71 |

|              |                                                                                  |              |                 |           |        |          |       |
|--------------|----------------------------------------------------------------------------------|--------------|-----------------|-----------|--------|----------|-------|
| 212751_at    | ubiquitin-conjugating enzyme E2N (UBC13 homolog, yeast)                          | UBE2N        | chr12q22        | Hs.524630 | 7334   | 0.012367 | -0.71 |
| 202373_s_at  | rab3 GTPase-activating protein, non-catalytic subunit (150kD)                    | RAB3-GAP     | chr1q41         | Hs.549128 | 25782  | 0.045061 | -0.71 |
| 233496_s_at  | cofilin 2 (muscle)                                                               | CFL2         | chr14q12        | Hs.180141 | 1073   | 0.000352 | -0.71 |
| 203521_s_at  | zinc finger protein 318                                                          | ZNF318       | chr6pter-p12.1  | Hs.509718 | 24149  | 0.007214 | -0.71 |
| 228981_at    | hypothetical protein BC008604                                                    | LOC92691     | chr2q35         | Hs.334916 | 92691  | 0.003216 | -0.71 |
| 213224_s_at  | hypothetical protein LOC92482                                                    | LOC92482     | chr10q25.2      | Hs.192249 | 92482  | 0.007063 | -0.71 |
| 231174_s_at  | Erythrocyte membrane protein band 4.1-like 2                                     | EPB41L2      | chr6q23         | Hs.486470 | 2037   | 0.006169 | -0.71 |
| 200727_s_at  | ARP2 actin-related protein 2 homolog (yeast)                                     | ACTR2        | chr2p14         | Hs.393201 | 10097  | 0.021203 | -0.71 |
| 218432_at    | F-box protein 3                                                                  | FBXO3        | chr11p13        | Hs.406787 | 26273  | 0.008414 | -0.71 |
| 212623_at    | Transmembrane protein 41B                                                        | TMEM41B      | chr11p15.3      | Hs.501865 | 23027  | 0.006403 | -0.71 |
| 225198_at    | VAMP (vesicle-associated membrane protein)-associated protein A, 33k             | VAPA         | chr18p11.22     | Hs.165195 | 9218   | 0.011398 | -0.71 |
| 228390_at    | Homo sapiens, clone IMAGE:5259272, mRNA                                          |              |                 | Hs.184430 |        | 0.001560 | -0.71 |
| 210875_s_at  | transcription factor 8 (represses interleukin 2 expression)                      | TCF8         | chr10p11.2      | Hs.124503 | 6935   | 0.007656 | -0.71 |
| 202922_at    | glutamate-cysteine ligase, catalytic subunit                                     | GCLC         | chr6p12         | Hs.271264 | 2729   | 0.038081 | -0.71 |
| 1568603_at   | Ca2+-dependent secretion activator                                               | CADPS        | chr3p14.2       | Hs.127013 | 8618   | 0.006954 | -0.71 |
| 218645_at    | zinc finger protein 277                                                          | ZNF277       | chr7q31.1       | Hs.489722 | 11179  | 0.014590 | -0.71 |
| 235885_at    | purinergic receptor P2Y, G-protein coupled, 12                                   | P2RY12       | chr3q24-q25     | Hs.532933 | 64805  | 0.011685 | -0.71 |
| 206061_s_at  | Dicer1, Dcr-1 homolog (Drosophila)                                               | DICER1       | chr14q32.13     | Hs.87889  | 23405  | 0.025517 | -0.71 |
| 227708_at    | eukaryotic translation elongation factor 1 alpha 1                               | EEF1A1       | chr6q14.1       | Hs.439552 | 1915   | 0.002729 | -0.71 |
| 231856_at    | KIAA1244                                                                         | KIAA1244     | chr6q23.3       | Hs.194408 | 57221  | 0.004937 | -0.71 |
| 203632_s_at  | G protein-coupled receptor, family C, group 5, member B                          | GPRC5B       | chr16p12        | Hs.148685 | 51704  | 0.045317 | -0.72 |
| 228218_at    | Homo sapiens, clone IMAGE:5284125, mRNA                                          |              |                 | Hs.26409  |        | 0.047370 | -0.72 |
| 202690_s_at  | small nuclear ribonucleoprotein D1 polypeptide 16kDa                             | SNRPD1       | chr18q11.2      | Hs.464734 | 6632   | 0.034706 | -0.72 |
| 218311_at    | mitogen-activated protein kinase kinase kinase 3                                 | MAP4K3       | chr2p22.1       | Hs.468239 | 8491   | 0.034616 | -0.72 |
| 208852_s_at  | calnexin                                                                         | CANX         | chr5q35         | Hs.529890 | 821    | 0.032075 | -0.72 |
| 224801_at    | Nedd4 family interacting protein 2                                               | NDFIP2       | chr13q31.1      | Hs.525093 | 54602  | 0.034285 | -0.72 |
| 235775_at    | hypothetical protein DKFZp762A217                                                | DKFZp762A217 | chr12q21.31     | Hs.444240 | 160335 | 0.004960 | -0.72 |
| 212262_at    | quaking homolog, KH domain RNA binding (mouse)                                   | QKI          | chr6q26-27      | Hs.510324 | 9444   | 0.011193 | -0.72 |
| 221568_s_at  | lin-7 homolog C (C. elegans)                                                     | LIN7C        | chr11p14        | Hs.91393  | 55327  | 0.039308 | -0.72 |
| 226404_at    |                                                                                  |              |                 |           |        | 0.049365 | -0.72 |
| 209440_at    | phosphoribosyl pyrophosphate synthetase 1                                        | PRPS1        | chrXq21-q27     | Hs.56     | 5631   | 0.021736 | -0.72 |
| 204160_s_at  | ectonucleotide pyrophosphatase/phosphodiesterase 4 (putative function)           | ENPP4        | chr6p21.1       | Hs.54037  | 22875  | 0.010012 | -0.72 |
| 222437_s_at  | vacuolar protein sorting 24 (yeast)                                              | VPS24        | chr2p24.3-p24.1 | Hs.255015 | 51652  | 0.031818 | -0.72 |
| 228408_s_at  |                                                                                  |              |                 |           |        | 0.041240 | -0.72 |
| 1554377_a_at | contactin associated protein-like 4                                              | CNTNAP4      |                 | Hs.461389 | 85445  | 0.023305 | -0.72 |
| 217862_at    | protein inhibitor of activated STAT, 1                                           | PIAS1        | chr15q          | Hs.162458 | 8554   | 0.028621 | -0.72 |
| 1561055_at   | Homo sapiens, clone IMAGE:5303550, mRNA                                          |              |                 | Hs.407601 |        | 0.029663 | -0.72 |
| 228857_at    | hypothetical protein LOC285831                                                   | LOC285831    | chr6p21.32      | Hs.550038 | 285831 | 0.019399 | -0.72 |
| 232001_at    | hypothetical gene supported by AY007155                                          | LOC439944    | chr10p15.1      | Hs.13262  | 439949 | 0.020139 | -0.72 |
| 201915_at    | SEC63-like (S. cerevisiae)                                                       | SEC63        | chr6q21         | Hs.529957 | 11231  | 0.001146 | -0.73 |
| 234982_at    | zinc finger protein 650                                                          | ZNF650       | chr2q31.1       | Hs.379548 | 130507 | 0.002109 | -0.73 |
| 236117_at    | Transcribed locus                                                                |              |                 | Hs.42747  |        | 0.023235 | -0.73 |
| 213229_at    | Dicer1, Dcr-1 homolog (Drosophila)                                               | DICER1       | chr14q32.13     | Hs.87889  | 23405  | 0.034619 | -0.73 |
| 203322_at    | KIAA0863 protein                                                                 | KIAA0863     | chr18q23        | Hs.131915 | 22850  | 0.003015 | -0.73 |
| 211960_s_at  | RAB7, member RAS oncogene family                                                 | RAB7         | chr3q21.3       | Hs.15738  | 7879   | 0.006910 | -0.73 |
| 201880_at    | Ariadne homolog, ubiquitin-conjugating enzyme E2 binding protein, 1 (Drosophila) | ARIH1        | chr15q24        | Hs.268787 | 25820  | 0.021358 | -0.73 |
| 228561_at    |                                                                                  |              |                 |           |        | 0.009221 | -0.73 |
| 201691_s_at  | tumor protein D52                                                                | TPD52        | chr8q21         | Hs.368433 | 7163   | 0.006463 | -0.73 |
| 200604_s_at  | protein kinase, cAMP-dependent, regulatory, type I, alpha (tissue specific)      | PRKAR1A      | chr17q23-q24    | Hs.280342 | 5573   | 0.038009 | -0.73 |
| 225433_at    | General transcription factor IIA, 1, 19/37kDa                                    | GTF2A1       | chr14q31.1      | Hs.547415 | 2957   | 0.011943 | -0.73 |
| 225125_at    | transmembrane protein 32                                                         | TMEM32       | chrXq26.3       | Hs.110702 | 93380  | 0.003000 | -0.73 |
| 214589_at    | fibroblast growth factor 12                                                      | FGF12        | chr3q28         | Hs.185577 | 2257   | 0.028789 | -0.73 |
| 235051_at    | chromosome 3 open reading frame 6                                                | C3orf6       |                 | Hs.478682 | 152137 | 0.005314 | -0.73 |
| 1556328_at   |                                                                                  |              |                 |           |        | 0.046686 | -0.73 |
| 219643_at    | low density lipoprotein-related protein 1B (deleted in tumors)                   | LRP1B        | chr2q21.2       | Hs.470117 | 53353  | 0.023936 | -0.73 |
| 230416_at    | Solute carrier family 18 (vesicular monoamine), member 2                         | SLC18A2      | chr10q25        | Hs.369009 | 6571   | 0.002570 | -0.73 |
| 212332_at    | retinoblastoma-like 2 (p130)                                                     | RBL2         | chr16q12.2      | Hs.513609 | 5934   | 0.039081 | -0.73 |
| 204645_at    | cyclin T2                                                                        | CCNT2        | chr2q21.3       | Hs.292754 | 905    | 0.012936 | -0.73 |
| 218506_x_at  | cytokine-like nuclear factor n-pac                                               | N-PAC        | chr16p13.3      | Hs.387255 | 84656  | 0.005576 | -0.73 |
| 227961_at    | Cathepsin B                                                                      | CTSB         | chr8p22         | Hs.520898 | 1508   | 0.019335 | -0.73 |
| 202224_at    | v-crk sarcoma virus CT10 oncogene homolog (avian)                                | CRK          | chr17p13.3      | Hs.461896 | 1398   | 0.038663 | -0.73 |
| 222393_s_at  | Mak3 homolog (S. cerevisiae)                                                     | MAK3         | chr3q13.2       | Hs.269528 | 80218  | 0.020315 | -0.73 |
| 221487_s_at  | endosulfine alpha                                                                | ENSA         | chr1q21.2       | Hs.510087 | 2029   | 0.016440 | -0.73 |
| 204161_s_at  | ectonucleotide pyrophosphatase/phosphodiesterase 4 (putative function)           | ENPP4        | chr6p21.1       | Hs.54037  | 22875  | 0.001300 | -0.73 |
| 241734_at    | serum response factor binding protein 1                                          | SRFBP1       | chr5q23.1       | Hs.107622 | 153443 | 0.001609 | -0.73 |
| 235801_at    | Tumor suppressor candidate 3                                                     | TUSC3        | chr8p22         | Hs.426324 | 7991   | 0.019024 | -0.73 |
| 219300_s_at  | contactin associated protein-like 2                                              | CNTNAP2      | chr7q35-q36     | Hs.446192 | 26047  | 0.003868 | -0.74 |
| 226721_at    | Hypothetical protein LOC286148                                                   | LOC286148    | chr8q22.1       | Hs.546537 | 286148 | 0.029766 | -0.74 |
| 202304_at    | fibronectin type III domain containing 3A                                        | FNDC3A       | chr13q14.2      | Hs.508010 | 22862  | 0.014086 | -0.74 |
| 238035_at    | Sp3 transcription factor                                                         | SP3          | chr2q31         | Hs.531587 | 6670   | 0.011959 | -0.74 |
| 202969_at    | Dual-specificity tyrosine-(Y)-phosphorylation regulated kinase 2                 | DYRK2        | chr12q15        | Hs.173135 | 8445   | 0.015892 | -0.74 |
| 238718_at    | CDNA FLJ37816 fis, clone BRSSN2003093                                            |              |                 | Hs.417630 |        | 0.009435 | -0.74 |
| 238546_at    | solute carrier family 8 (sodium/calcium exchanger), member 1                     | SLC8A1       | chr2p23-p22     | Hs.468274 | 6546   | 0.020991 | -0.74 |
| 228493_at    | A kinase (PRKA) anchor protein 14                                                | AKAP14       | chrXq24         | Hs.184993 | 158798 | 0.012554 | -0.74 |

|              |                                                                                                       |           |                   |           |             |          |       |
|--------------|-------------------------------------------------------------------------------------------------------|-----------|-------------------|-----------|-------------|----------|-------|
| 220985_s_at  | ring finger protein 170 /// ring finger protein 17C                                                   | RNF170    | chr8p11.21        | Hs.491626 | 81790       | 0.002046 | -0.74 |
| 210363_s_at  | sodium channel, voltage-gated, type II, beta                                                          | SCN2B     | chr11q23          | Hs.129783 | 6327        | 0.012237 | -0.74 |
| 1557081_at   | RNA binding motif protein 25                                                                          | RBM25     | chr14q24.3        | Hs.531106 | 58517       | 0.043842 | -0.74 |
| 224187_x_at  | heat shock 70kDa protein 8                                                                            | HSPA8     | chr11q24.1        | Hs.180414 | 3312        | 0.024661 | -0.74 |
| 202423_at    | MYST histone acetyltransferase (monocytic leukemia) 3                                                 | MYST3     | chr8p11           | Hs.491577 | 7994        | 0.025819 | -0.74 |
| 231964_at    | MRNA; cDNA DKFZp564H1663 (from clone DKFZp564H1663)                                                   |           |                   | Hs.137206 |             | 0.006879 | -0.74 |
| 203362_s_at  | MAD2 mitotic arrest deficient-like 1 (yeast)                                                          | MAD2L1    | chr4q27           | Hs.533185 | 4085        | 0.025865 | -0.74 |
| 226339_at    | TruB pseudouridine (psi) synthase homolog 1 (E. coli)                                                 | TRUB1     | chr10q25.3        | Hs.21187  | 142940      | 0.001998 | -0.74 |
| 228189_at    | BCL2-associated athanogene 4                                                                          | BAG4      | chr8p12           | Hs.194726 | 9530        | 0.025277 | -0.74 |
| 229212_at    | Casein kinase 2, alpha 1 polypeptide                                                                  | CSNK2A1   | chr20p13          | Hs.446484 | 1457        | 0.013157 | -0.74 |
| 201951_at    |                                                                                                       |           |                   |           |             | 0.009496 | -0.74 |
| 203457_at    | syntaxin 7                                                                                            | STX7      | chr6q23.1         | Hs.520383 | 8417        | 0.007686 | -0.74 |
| 222659_at    | importin 11                                                                                           | IPO11     | chr5q12.1         | Hs.482269 | 51194       | 0.027133 | -0.75 |
| 229414_at    | phosphatidylinositol transfer protein, cytoplasmic 1                                                  | PITPNC1   | chr17q24.2        | Hs.549130 | 26207       | 0.025508 | -0.75 |
| 211769_x_at  | tumor differentially expressed 1 /// tumor differentially expressed 1                                 | TDE1      | chr20q13.1-13.3   | Hs.272168 | 10955       | 0.016508 | -0.75 |
| 223943_s_at  |                                                                                                       |           |                   |           |             | 0.024644 | -0.75 |
| 220994_s_at  | syntaxin binding protein 6 (amisyn)                                                                   | STXBP6    | chr14q12          | Hs.508958 | 29091       | 0.011181 | -0.75 |
| 241887_at    | CDNA FLJ41537 fis, clone BRTHA2017985                                                                 |           |                   | Hs.128841 |             | 0.010932 | -0.75 |
| 210292_s_at  | protocadherin 11 X-linked /// protocadherin 11 Y-linked                                               | PCDH11X   | chrXq21.3 /// chr | Hs.546448 | 27328 /// 8 | 0.034755 | -0.75 |
| 208944_at    |                                                                                                       |           |                   |           |             | 0.009691 | -0.75 |
| 235890_at    |                                                                                                       |           |                   |           |             | 0.039240 | -0.75 |
| 235037_at    | transmembrane protein 41A                                                                             | TMEM41A   | chr3q27.2         | Hs.549226 | 90407       | 0.011455 | -0.75 |
| 236517_at    | MEGF10 protein                                                                                        | MEGF10    | chr5q33           | Hs.438709 | 84466       | 0.032338 | -0.75 |
| 226399_at    | Hypothetical protein FLJ14281                                                                         | FLJ14281  | chr4q23           | Hs.512743 | 79982       | 0.024881 | -0.75 |
| 217743_s_at  | transmembrane protein 30A                                                                             | TMEM30A   | chr6q14.1         | Hs.108530 | 55754       | 0.006853 | -0.75 |
| 205260_s_at  | acylphosphatase 1, erythrocyte (common) type                                                          | ACYP1     | chr14q24.3        | Hs.18573  | 97          | 0.023872 | -0.75 |
| 225785_at    | chromosome 10 open reading frame 74                                                                   | C10orf74  | chr10q21.3        | Hs.499833 | 221035      | 0.009623 | -0.75 |
| 235183_at    | Homo sapiens, clone IMAGE:5312689, mRNA                                                               |           |                   | Hs.548069 |             | 0.041700 | -0.75 |
| 228791_at    | Hypothetical protein MGC61550                                                                         | MGC61550  | chr15q26.1        | Hs.6734   | 348110      | 0.045530 | -0.75 |
| 226347_at    |                                                                                                       |           |                   |           |             | 0.034255 | -0.75 |
| 203253_s_at  | KIAA0433 protein                                                                                      | KIAA0433  | chr5q21.1         | Hs.212046 | 23262       | 0.002627 | -0.75 |
| 226456_at    | hypothetical protein MGC24665                                                                         | MGC24665  | chr16p13.13       | Hs.347524 | 116028      | 0.009320 | -0.75 |
| 219429_at    | fatty acid 2-hydroxylase                                                                              | FA2H      | chr16q23          | Hs.461329 | 79152       | 0.035608 | -0.75 |
| 202955_s_at  | ADP-ribosylation factor guanine nucleotide-exchange factor 1(brefeldin                                | ARFGEF1   | chr8q13           | Hs.411848 | 10565       | 0.041277 | -0.75 |
| 204172_at    | coproporphyrinogen oxidase                                                                            | CPOX      | chr3q12           | Hs.476982 | 1371        | 0.001984 | -0.76 |
| 201744_s_at  | lumican                                                                                               | LUM       | chr12q21.3-q22    | Hs.406475 | 4060        | 0.020713 | -0.76 |
| 224777_s_at  | platelet-activating factor acetylhydrolase, isoform Ib, beta subunit 30kD                             | PAFAH1B2  | chr11q23          | Hs.188501 | 5049        | 0.041481 | -0.76 |
| 222442_s_at  | ADP-ribosylation factor-like 10C                                                                      | ARL10C    | chr3p26.1         | Hs.250009 | 55207       | 0.001604 | -0.76 |
| 227446_s_at  |                                                                                                       |           |                   |           |             | 0.014267 | -0.76 |
| 227256_at    | ubiquitin specific protease 31                                                                        | USP31     | chr16p12.1        | Hs.183817 | 57478       | 0.027129 | -0.76 |
| 242028_at    | hypothetical protein FLJ38281                                                                         | FLJ38281  | chr19p13.2        | Hs.306478 | 163051      | 0.007344 | -0.76 |
| 225731_at    | KIAA1223 protein                                                                                      | KIAA1223  | chr4q28.1         | Hs.480694 | 57182       | 0.012857 | -0.76 |
| 224744_at    | myo-inositol monophosphatase A3                                                                       | IMPA3     | chr8q12.1         | Hs.438689 | 54928       | 0.009393 | -0.76 |
| 221288_at    | G protein-coupled receptor 22                                                                         | GPR22     | chr7q22-q31.1     | Hs.432557 | 2845        | 0.001893 | -0.76 |
| 1555945_s_at | chromosome 9 open reading frame 10                                                                    | C9orf10   | chr9q22.31        | Hs.372003 | 23196       | 0.008417 | -0.76 |
| 201408_at    | protein phosphatase 1, catalytic subunit, beta isoform                                                | PPP1CB    | chr2p23           | Hs.468018 | 5500        | 0.043099 | -0.76 |
| 207142_at    | potassium inwardly-rectifying channel, subfamily J, member 3                                          | KCNJ3     | chr2q24.1         | Hs.199776 | 3760        | 0.018154 | -0.76 |
| 224786_at    | short coiled-coil protein                                                                             | SCOC      | chr4q31.1         | Hs.480815 | 60592       | 0.004076 | -0.76 |
| 1555334_s_at | solute carrier family 30 (zinc transporter), member 5                                                 | SLC30A5   | chr5q12.1         | Hs.482363 | 64924       | 0.013608 | -0.76 |
| 225872_at    | solute carrier family 35, member F5                                                                   | SLC35F5   | chr2q14.1         | Hs.292509 | 80255       | 0.015576 | -0.76 |
| 1553106_at   | hypothetical protein FLJ37562                                                                         | FLJ37562  | chr5q31.1         | Hs.406549 | 134553      | 0.003544 | -0.76 |
| 227316_at    | CSRP2 binding protein                                                                                 | CSRP2BP   | chr20p11.23       | Hs.488051 | 57325       | 0.027885 | -0.76 |
| 206668_s_at  | secretory carrier membrane protein 1                                                                  | SCAMP1    | chr5q13.3-q14.1   | Hs.482587 | 9522        | 0.036014 | -0.76 |
| 219179_at    | dapper homolog 1, antagonist of beta-catenin (xenopus)                                                | DACT1     | chr14q23.1        | Hs.48950  | 51339       | 0.019349 | -0.76 |
| 220355_s_at  | polybromo 1                                                                                           | PB1       | chr3p21           | Hs.189920 | 55193       | 0.002167 | -0.76 |
| 238521_at    | Transcribed locus, weakly similar to XP_376981.1 similar to hypothetical protein (L1H 3 region) - hum |           |                   | Hs.390250 |             | 0.020981 | -0.76 |
| 208127_s_at  | suppressor of cytokine signaling 5                                                                    | Socs5     | chr2p21           | Hs.468426 | 9655        | 0.002364 | -0.76 |
| 241966_at    | myosin VA (heavy polypeptide 12, myosin)                                                              | MYO5A     | chr15q21          | Hs.21213  | 4644        | 0.039750 | -0.77 |
| 219302_s_at  | contactin associated protein-like 2                                                                   | CNTNAP2   | chr7q35-q36       | Hs.446192 | 26047       | 0.011595 | -0.77 |
| 226199_at    | hypothetical protein MGC23937 similar to CG4798                                                       | RP11-311P | chrXq13.3         | Hs.91612  | 139596      | 0.047320 | -0.77 |
| 209095_at    | dihydroliipoamide dehydrogenase (E3 component of pyruvate dehydrog                                    | DLD       | chr7q31-q32       | Hs.131711 | 1738        | 0.035117 | -0.77 |
| 219569_s_at  | transmembrane protein 22                                                                              | TMEM22    | chr3q22.3         | Hs.477692 | 80723       | 0.024922 | -0.77 |
| 202539_s_at  | 3-hydroxy-3-methylglutaryl-Coenzyme A reductase                                                       | HMGCR     | chr5q13.3-q14     | Hs.11899  | 3156        | 0.009621 | -0.77 |
| 227364_at    |                                                                                                       |           |                   |           |             | 0.024448 | -0.77 |
| 242317_at    | Transcribed locus                                                                                     |           |                   | Hs.192124 |             | 0.018781 | -0.77 |
| 230569_at    | KIAA1430                                                                                              | KIAA1430  | chr4q35.1         | Hs.535734 | 57587       | 0.017557 | -0.77 |
| 219421_at    | osmosis responsive factor                                                                             | OSRF      | chr5p15.2-p12     | Hs.130904 | 23548       | 0.008500 | -0.77 |
| 226077_at    | hypothetical protein FLJ31951                                                                         | FLJ31951  | chr5q33.3         | Hs.349306 | 153830      | 0.037111 | -0.77 |
| 238850_at    | CDNA clone IMAGE:5260726, partial cds                                                                 |           |                   | Hs.12827  |             | 0.045420 | -0.77 |
| 224865_at    | male sterility domain containing 2                                                                    | MLSTD2    | chr11p15.2        | Hs.501991 | 84188       | 0.035040 | -0.77 |
| 226429_at    | KIAA1704                                                                                              | KIAA1704  | chr13q13-q14      | Hs.507922 | 55425       | 0.032429 | -0.77 |
| 239960_x_at  | CDNA FLJ32429 fis, clone SKMUS2001014                                                                 |           |                   | Hs.508823 |             | 0.004194 | -0.77 |
| 201668_x_at  | myristoylated alanine-rich protein kinase C substrate                                                 | MARCKS    | chr6q22.2         | Hs.519909 | 4082        | 0.016620 | -0.77 |
| 212103_at    | Karyopherin alpha 6 (importin alpha 7)                                                                | KPNA6     | chr1p35.1-p34.3   | Hs.470588 | 23633       | 0.011626 | -0.77 |

|              |                                                                         |           |                  |           |        |  |                 |              |
|--------------|-------------------------------------------------------------------------|-----------|------------------|-----------|--------|--|-----------------|--------------|
| 1566509_s_at | F-box protein 9                                                         | FBXO9     | chr6p12.3-p11.2  | Hs.216653 | 26268  |  | <b>0.029702</b> | <b>-0.77</b> |
| 219267_at    | glycolipid transfer protein                                             | GLTP      | chr12q24.11      | Hs.381256 | 51228  |  | <b>0.000725</b> | <b>-0.77</b> |
| 242206_at    | similar to Zinc finger protein 58 (Zfp-58) (Zinc finger protein Mfg-1)  | LOC340244 | chr7q11.21       | Hs.434984 | 340246 |  | <b>0.011739</b> | <b>-0.77</b> |
| 226887_at    | heat shock 70kDa protein 14                                             | HSPA14    | chr10p13         | Hs.534169 | 51182  |  | <b>0.008480</b> | <b>-0.78</b> |
| 202932_at    | v-yes-1 Yamaguchi sarcoma viral oncogene homolog 1                      | YES1      | chr18p11.31-p11  | Hs.194148 | 7525   |  | <b>0.003101</b> | <b>-0.78</b> |
| 230265_at    | Sel-1 suppressor of lin-12-like (C. elegans)                            | SEL1L     | chr14q24.3-q31   | Hs.181300 | 6400   |  | <b>0.021533</b> | <b>-0.78</b> |
| 219858_s_at  | FLJ20160 protein                                                        | FLJ20160  | chr2q32.2        | Hs.418581 | 54842  |  | <b>0.011393</b> | <b>-0.78</b> |
| 237741_at    | Hypothetical protein FLJ10618                                           | FLJ10618  | chr3q23          | Hs.144130 | 55186  |  | <b>0.037709</b> | <b>-0.78</b> |
| 203086_at    | Kinesin heavy chain member 2                                            | KIF2      | chr5q12-q13      | Hs.552575 | 3796   |  | <b>0.013564</b> | <b>-0.78</b> |
| 1554868_s_at | PEST-containing nuclear protein                                         | PCNP      | chr3q12.3        | Hs.549185 | 57092  |  | <b>0.043100</b> | <b>-0.78</b> |
| 219109_at    | sperm associated antigen 16                                             | SPAG16    | chr2q34          | Hs.471316 | 79582  |  | <b>0.032033</b> | <b>-0.78</b> |
| 200638_s_at  | tyrosine 3-monooxygenase/tryptophan 5-monooxygenase activation prd      | YWHAZ     | chr8q23.1        | Hs.492407 | 7534   |  | <b>0.015320</b> | <b>-0.78</b> |
| 201865_x_at  | nuclear receptor subfamily 3, group C, member 1 (glucocorticoid recepte | NR3C1     | chr5q31          | Hs.122926 | 2908   |  | <b>0.047779</b> | <b>-0.78</b> |
| 210427_s_at  | selenoprotein P, plasma, 1                                              | SEPP1     | chr5q31          | Hs.275775 | 6414   |  | <b>0.009288</b> | <b>-0.78</b> |
| 208868_s_at  | GABA(A) receptor-associated protein like 1                              | GABARAPL  | chr12p13.2       | Hs.524250 | 23710  |  | <b>0.035176</b> | <b>-0.78</b> |
| 204678_s_at  | potassium channel, subfamily K, member 1                                | KCNK1     | chr14q2-q43      | Hs.208544 | 3775   |  | <b>0.007349</b> | <b>-0.78</b> |
| 206875_s_at  | STE20-like kinase (yeast)                                               | SLK       | chr10q25.1       | Hs.500972 | 9748   |  | <b>0.014801</b> | <b>-0.78</b> |
| 227082_at    | MRNA; cDNA DKFzP586K1922 (from clone DKFzP586K1922)                     |           |                  | Hs.193784 |        |  | <b>0.033917</b> | <b>-0.78</b> |
| 212908_at    | KIAA0962 protein                                                        | KIAA0962  | chr1p36.1        | Hs.549123 | 23341  |  | <b>0.029391</b> | <b>-0.78</b> |
| 217750_s_at  | hypothetical protein FLJ13855                                           | FLJ13855  | chr17q21.32      | Hs.514297 | 65264  |  | <b>0.046686</b> | <b>-0.78</b> |
| 235864_at    | Membrane protein, palmitoylated 5 (MAGUK p55 subfamily member 5)        | MPP5      | chr14q23.3       | Hs.509699 | 64398  |  | <b>0.009474</b> | <b>-0.78</b> |
| 228654_at    | hypothetical protein LOC139886                                          | LOC139886 | chrXq11.2        | Hs.111496 | 139886 |  | <b>0.033490</b> | <b>-0.78</b> |
| 225575_at    | Leukemia inhibitory factor receptor                                     | LIFR      | chr5p13-p12      | Hs.133421 | 3977   |  | <b>0.021165</b> | <b>-0.78</b> |
| 212308_at    | cytoplasmic linker associated protein 2                                 | CLASP2    | chr3p23          | Hs.108614 | 23122  |  | <b>0.027469</b> | <b>-0.78</b> |
| 221830_at    | RAP2A, member of RAS oncogene family                                    | RAP2A     | chr13q34         | Hs.508480 | 5911   |  | <b>0.046895</b> | <b>-0.79</b> |
| 231862_at    | Chromobox homolog 5 (HP1 alpha homolog, Drosophila)                     | CBX5      | chr12q13.13      | Hs.349283 | 23468  |  | <b>0.011361</b> | <b>-0.79</b> |
| 235164_at    | zinc finger protein 25 (KOX 19)                                         | ZNF25     | chr10p11.21      | Hs.499429 | 219749 |  | <b>0.034462</b> | <b>-0.79</b> |
| 238792_at    | Pecanex homolog (Drosophila)                                            | PCNX      | chr14q24.2       | Hs.158722 | 22990  |  | <b>0.012614</b> | <b>-0.79</b> |
| 203789_s_at  | sema domain, immunoglobulin domain (Ig), short basic domain, secrete    | SEMA3C    | chr7q21-q31      | Hs.269109 | 10512  |  | <b>0.000387</b> | <b>-0.79</b> |
| 228214_at    | Transcribed locus                                                       |           |                  | Hs.34145  |        |  | <b>0.002061</b> | <b>-0.79</b> |
| 225388_at    | tetraspanin 5                                                           | TSPAN5    | chr4q23          | Hs.118118 | 10098  |  | <b>0.013469</b> | <b>-0.79</b> |
| 217452_s_at  | UDP-Gal:betaGlcNAc beta 1,3-galactosyltransferase, polypeptide 2        | B3GALT2   | chr1q31          | Hs.518834 | 8707   |  | <b>0.018626</b> | <b>-0.79</b> |
| 225626_at    | phosphoprotein associated with glycosphingolipid-enriched microdoma     | PAG       | chr8q21.13       | Hs.266175 | 55824  |  | <b>0.002846</b> | <b>-0.79</b> |
| 228746_s_at  | Hypothetical protein H41                                                | H41       | chr3q22.1        | Hs.518265 | 55573  |  | <b>0.045162</b> | <b>-0.79</b> |
| 204732_s_at  | tripartite motif-containing 23                                          | TRIM23    | chr5q12.3        | Hs.792    | 373    |  | <b>0.022236</b> | <b>-0.79</b> |
| 1553247_a_at | hypothetical protein FLJ38281                                           | FLJ38281  | chr19p13.2       | Hs.306478 | 163051 |  | <b>0.045118</b> | <b>-0.79</b> |
| 204361_s_at  | src family associated phosphoprotein 2                                  | SCAP2     | chr7p21-p15      | Hs.200770 | 8935   |  | <b>0.009781</b> | <b>-0.79</b> |
| 201559_s_at  | chloride intracellular channel 4                                        | CLIC4     | chr1p36.11       | Hs.440544 | 25932  |  | <b>0.000541</b> | <b>-0.79</b> |
| 225219_at    | SMAD, mothers against DPP homolog 5 (Drosophila)                        | SMAD5     | chr5q31          | Hs.167700 | 4090   |  | <b>0.016382</b> | <b>-0.79</b> |
| 242762_s_at  | KIAA1946                                                                | KIAA1946  | chr2q32.1        | Hs.28872  | 165215 |  | <b>0.045222</b> | <b>-0.79</b> |
| 231239_at    | EPH receptor A5                                                         | EPHA5     | chr4q13.1        | Hs.479853 | 2044   |  | <b>0.019272</b> | <b>-0.79</b> |
| 230538_at    | rai-like protein                                                        | RaLP      | chr15q21.1-q21.2 | Hs.552630 | 399694 |  | <b>0.017860</b> | <b>-0.79</b> |
| 223661_at    |                                                                         |           |                  |           |        |  | <b>0.039309</b> | <b>-0.79</b> |
| 203883_s_at  | RAB11 family interacting protein 2 (class I)                            | RAB11FIP2 | chr10q26.11      | Hs.173656 | 22841  |  | <b>0.018123</b> | <b>-0.79</b> |
| 244334_at    | translocation associated membrane protein 1-like 1                      | TRAM1L1   | chr4q26          | Hs.154218 | 133022 |  | <b>0.037515</b> | <b>-0.79</b> |
| 227123_at    | RAB3B, member RAS oncogene family                                       | RAB3B     | chr1p32-p31      | Hs.123072 | 5865   |  | <b>0.028214</b> | <b>-0.79</b> |
| 223547_at    | chromosome 14 open reading frame 100                                    | C14orf100 | chr14q23.1       | Hs.446850 | 51528  |  | <b>0.000906</b> | <b>-0.79</b> |
| 203087_s_at  | kinesin heavy chain member 2                                            | KIF2      | chr5q12-q13      | Hs.552575 | 3796   |  | <b>0.002552</b> | <b>-0.80</b> |
| 202206_at    | ADP-ribosylation factor-like 7                                          | ARL7      | chr2q37.1        | Hs.111554 | 10123  |  | <b>0.015159</b> | <b>-0.80</b> |
| 233910_at    | transmembrane protein with EGF-like and two follistatin-like domains 2  | TMEFF2    | chr2q32.3        | Hs.144513 | 23671  |  | <b>0.026691</b> | <b>-0.80</b> |
| 201237_at    | capping protein (actin filament) muscle Z-line, alpha 2                 | CAPZA2    | chr7q31.2-q31.3  | Hs.446123 | 830    |  | <b>0.011359</b> | <b>-0.80</b> |
| 212897_at    | cell division cycle 2-like 6 (CDK8-like)                                | CDC2L6    | chr6q21          | Hs.193251 | 23097  |  | <b>0.013763</b> | <b>-0.80</b> |
| 238861_at    | MRNA; clone CD 4377                                                     |           |                  | Hs.290856 |        |  | <b>0.024720</b> | <b>-0.80</b> |
| 205358_at    | glutamate receptor, ionotropic, AMPA 2                                  | GRIA2     | chr4q32-q33      | Hs.32763  | 2891   |  | <b>0.042270</b> | <b>-0.80</b> |
| 212461_at    |                                                                         |           |                  |           |        |  | <b>0.015618</b> | <b>-0.80</b> |
| 212244_at    | glutamate receptor, ionotropic, N-methyl D-aspartate-like 1A            | GRIN1A    | chr15q22.1       | Hs.437256 | 81488  |  | <b>0.002648</b> | <b>-0.80</b> |
| 228601_at    | hypothetical LOC401022                                                  | LOC401022 | chr2q31.2        | Hs.98661  | 401022 |  | <b>0.026666</b> | <b>-0.80</b> |
| 227442_at    | hypothetical protein FLJ38991                                           | FLJ38991  | chr4q13.3        | Hs.356697 | 285521 |  | <b>0.018157</b> | <b>-0.80</b> |
| 207781_s_at  | zinc finger protein 6 (CMPX1)                                           | ZNF6      | chrXq13-q21.1    | Hs.326801 | 7552   |  | <b>0.027521</b> | <b>-0.80</b> |
| 209243_s_at  | paternally expressed 3                                                  | PEG3      | chr19q13.4       | Hs.201776 | 5178   |  | <b>0.024603</b> | <b>-0.80</b> |
| 202919_at    | preimplantation protein 3                                               | PREI3     | chr2q33.1        | Hs.205173 | 25843  |  | <b>0.003125</b> | <b>-0.80</b> |
| 204011_at    | sprouty homolog 2 (Drosophila)                                          | SPRY2     | chr13q31.1       | Hs.18676  | 10253  |  | <b>0.019455</b> | <b>-0.80</b> |
| 230692_at    | hypothetical protein LOC157503                                          | LOC157503 | chr8q11.23       | Hs.103535 | 157503 |  | <b>0.037472</b> | <b>-0.80</b> |
| 224692_at    | protein phosphatase 1, regulatory (inhibitor) subunit 15E               | PPP1R15B  | chr1q32.1        | Hs.304376 | 84919  |  | <b>0.004442</b> | <b>-0.80</b> |
| 203083_at    | thrombospondin 2                                                        | THBS2     | chr6q27          | Hs.371147 | 7058   |  | <b>0.026602</b> | <b>-0.81</b> |
| 223261_at    | polymerase (DNA directed) kappa                                         | POLK      | chr5q13          | Hs.135756 | 51426  |  | <b>0.003884</b> | <b>-0.81</b> |
| 227535_at    | Chromosome 15 open reading frame 24                                     | C15orf24  | chr15q14         | Hs.160565 | 56851  |  | <b>0.037856</b> | <b>-0.81</b> |
| 212335_at    | glucosamine (N-acetyl)-6-sulfatase (Sanfilippo disease IIID)            | GNS       | chr12q14         | Hs.334534 | 2799   |  | <b>0.005025</b> | <b>-0.81</b> |
| 208687_x_at  | heat shock 70kDa protein 8                                              | HSPA8     | chr11q24.1       | Hs.180414 | 3312   |  | <b>0.033309</b> | <b>-0.81</b> |
| 201829_at    | neuroepithelial cell transforming gene 1                                | NET1      | chr10p15         | Hs.25155  | 10276  |  | <b>0.035920</b> | <b>-0.81</b> |
| 210729_at    | neuropeptide Y receptor Y2                                              | NPY2R     | chr4q31          | Hs.37125  | 4887   |  | <b>0.019484</b> | <b>-0.81</b> |
| 200755_s_at  | calumenin                                                               | CALU      | chr7q32          | Hs.7753   | 813    |  | <b>0.004362</b> | <b>-0.81</b> |
| 212572_at    | serine/threonine kinase 38 like                                         | STK38L    | chr12p11.23      | Hs.184523 | 23012  |  | <b>0.013493</b> | <b>-0.81</b> |
| 209895_at    | protein tyrosine phosphatase, non-receptor type 11 (Noonan syndrome)    | PTPN11    | chr12q24         | Hs.506852 | 5781   |  | <b>0.012486</b> | <b>-0.81</b> |



|              |                                                                            |           |                  |           |           |  |          |       |
|--------------|----------------------------------------------------------------------------|-----------|------------------|-----------|-----------|--|----------|-------|
| 230779_at    | MRNA; cDNA DKFZp761i2317 (from clone DKFZp761i2317)                        |           |                  |           | Hs.442983 |  | 0.025558 | -0.81 |
| 222811_at    | hypothetical protein FLJ11171                                              | FLJ11171  | chr16q22.2       | Hs.72782  | 55783     |  | 0.000015 | -0.81 |
| 235476_at    | tripartite motif-containing 59                                             | TRIM59    | chr3q25.33       | Hs.212957 | 286827    |  | 0.000419 | -0.81 |
| 226180_at    | WD repeat domain 36                                                        | WDR36     | chr5q22.1        | Hs.533237 | 134430    |  | 0.007475 | -0.81 |
| 211749_s_at  | vesicle-associated membrane protein 3 (cellubrevin) /// vesicle-associat   | VAMP3     | chr1p36.23       | Hs.66708  | 9341      |  | 0.001868 | -0.82 |
| 225690_at    | CDC2-related protein kinase 7                                              | CRK7      | chr17q12         | Hs.416108 | 51755     |  | 0.015073 | -0.82 |
| 228129_at    | PAI-1 mRNA-binding protein                                                 | PAI-RBP1  | chr1p31-p22      | Hs.530412 | 26135     |  | 0.033104 | -0.82 |
| 227209_at    | Contactin 1                                                                | CNTN1     | chr12q11-q12     | Hs.549027 | 1272      |  | 0.008298 | -0.82 |
| 227012_at    | mitochondrial carrier family protein                                       | MCFP      | chr7q21.12       | Hs.208414 | 55972     |  | 0.002949 | -0.82 |
| 225399_at    | chromosome 1 open reading frame 19                                         | C1orf19   | chr1q25          | Hs.440663 | 116461    |  | 0.029873 | -0.82 |
| 207152_at    | neurotrophic tyrosine kinase, receptor, type 2                             | NTRK2     | chr9q22.1        | Hs.494312 | 4915      |  | 0.028153 | -0.82 |
| 214921_at    | potassium large conductance calcium-activated channel, subfamily M, a      | KCNMA1    | chr10q22.3       | Hs.144795 | 3778      |  | 0.044464 | -0.82 |
| 222407_s_at  | zinc finger protein 106 homolog (mouse)                                    | ZFP106    | chr15q15.1       | Hs.511143 | 64397     |  | 0.012684 | -0.82 |
| 213032_at    | Nuclear factor I/B                                                         | NFIB      | chr9p24.1        | Hs.370359 | 4781      |  | 0.019877 | -0.82 |
| 201083_s_at  | BCL2-associated transcription factor 1                                     | BCLAF1    | chr6q22-q23      | Hs.486542 | 9774      |  | 0.003669 | -0.82 |
| 211137_s_at  | ATPase, Ca++ transporting, type 2C, member 1                               | ATP2C1    | chr3q22.1        | Hs.546361 | 27032     |  | 0.011749 | -0.82 |
| 224977_at    |                                                                            |           |                  |           |           |  | 0.035918 | -0.82 |
| 201444_s_at  | ATPase, H+ transporting, lysosomal accessory protein 2                     | ATP6AP2   | chrXq21          | Hs.495960 | 10159     |  | 0.034105 | -0.82 |
| 203803_at    | prenylcysteine oxidase 1                                                   | PCYOX1    | chr2p13.3        | Hs.551542 | 51449     |  | 0.001167 | -0.82 |
| 1554133_at   | RUN and FYVE domain containing 2                                           | RUFY2     | chr10q21.3       | Hs.549177 | 55680     |  | 0.014534 | -0.82 |
| 221905_at    | cylindromatosis (turban tumor syndrome)                                    | CYLD      | chr16q12-q13 16  | Hs.432993 | 1540      |  | 0.038332 | -0.82 |
| 218458_at    | germ cell-less homolog 1 (Drosophila)                                      | GCL       | chr2p13.3        | Hs.293971 | 64395     |  | 0.007116 | -0.82 |
| 229115_at    | dynein, cytoplasmic, heavy polypeptide 1                                   | DNCH1     | chr14q32.3-qter  | Hs.7720   | 1778      |  | 0.044525 | -0.83 |
| 203845_at    | p300/CBP-associated factor                                                 | PCAF      | chr3p24          | Hs.533055 | 8850      |  | 0.038929 | -0.83 |
| 225132_at    | F-box and leucine-rich repeat protein 3                                    | FBXL3     | chr13q22         | Hs.508284 | 26224     |  | 0.006723 | -0.83 |
| 229138_at    | poly (ADP-ribose) polymerase family, member 11                             | PARP11    | chr12p13.3       | Hs.504538 | 57097     |  | 0.001291 | -0.83 |
| 201659_s_at  | ADP-ribosylation factor-like 1                                             | ARL1      | chr12q23.3       | Hs.372616 | 400       |  | 0.006245 | -0.83 |
| 229074_at    | EH-domain containing 4                                                     | EHD4      | chr15q11.1       | Hs.143703 | 30844     |  | 0.010498 | -0.83 |
| 215303_at    | Clones 24632 and 24634 mRNA sequence                                       |           |                  | Hs.129997 |           |  | 0.007403 | -0.83 |
| 227481_at    | CNKSR family member 3                                                      | CNKSR3    | chr6q25.2        | Hs.16064  | 154043    |  | 0.002104 | -0.83 |
| 229010_at    | Cas-Br-M (murine) ecotropic retroviral transforming sequence               | CBL       | chr11q23.3       | Hs.504096 | 867       |  | 0.040990 | -0.83 |
| 212678_at    | Neurofibromin 1 (neurofibromatosis, von Recklinghausen disease, Wats       | NF1       | chr17q11.2       | Hs.435956 | 4763      |  | 0.011618 | -0.83 |
| 204063_s_at  | unc-51-like kinase 2 (C. elegans)                                          | ULK2      | chr17p11.2       | Hs.168762 | 9706      |  | 0.036779 | -0.83 |
| 203128_at    | serine palmitoyltransferase, long chain base subunit 2                     | SPTLC2    | chr14q24.3-q31   | Hs.435661 | 9517      |  | 0.008052 | -0.83 |
| 219642_s_at  | peroxisomal biogenesis factor 5-like                                       | PEX5L     | chr3q26.33       | Hs.478393 | 51555     |  | 0.034915 | -0.83 |
| 206075_s_at  | casein kinase 2, alpha 1 polypeptide                                       | CSNK2A1   | chr20p13         | Hs.446484 | 1457      |  | 0.008499 | -0.83 |
| 200973_s_at  | tetraspanin 3                                                              | TSPAN3    | chr15q24.3       | Hs.5062   | 10099     |  | 0.033463 | -0.83 |
| 212263_at    | quaking homolog, KH domain RNA binding (mouse)                             | QKI       | chr6q26-27       | Hs.510324 | 9444      |  | 0.008272 | -0.84 |
| 238929_at    | Splicing factor, arginine/serine-rich, 46kD                                | SRP46     | chr11q22         | Hs.476680 | 10929     |  | 0.011667 | -0.84 |
| 219112_at    | Rap guanine nucleotide exchange factor (GEF) 6                             | RAPGEF6   | chr5q23.3        | Hs.51735  | 51735     |  | 0.035639 | -0.84 |
| 233437_at    | gamma-aminobutyric acid (GABA) A receptor, alpha 4                         | GABRA4    | chr4p12          | Hs.248112 | 2557      |  | 0.033427 | -0.84 |
| 235977_at    | CDNA FLJ36725 fis, clone UTERU2012230                                      |           |                  | Hs.21380  |           |  | 0.019509 | -0.84 |
| 224614_at    | dynein, cytoplasmic, light intermediate polypeptide 2                      | DNLI2     | chr16q22.1       | Hs.369068 | 1783      |  | 0.038740 | -0.84 |
| 221428_s_at  | transducin (beta)-like 1X-linked receptor 1 /// transducin (beta)-like 1X- | TBL1XR1   | chr3q26.32       | Hs.438970 | 79718     |  | 0.031049 | -0.84 |
| 228734_at    | Ubiquitin-conjugating enzyme E2 variant 2                                  | UBE2V2    | chr8q11.21       | Hs.491695 | 7336      |  | 0.001567 | -0.84 |
| 200864_s_at  | RAB11A, member RAS oncogene family                                         | RAB11A    | chr15q21.3-q22.3 | Hs.321541 | 8766      |  | 0.020181 | -0.84 |
| 237828_at    | KIAA1853 protein                                                           | KIAA1853  | chr12q24.23      | Hs.112577 | 84530     |  | 0.044485 | -0.84 |
| 208844_at    | voltage-dependent anion channel 3                                          | VDAC3     | chr8p11.2        | Hs.491597 | 7419      |  | 0.045233 | -0.85 |
| 224908_s_at  | tubulin tyrosine ligase                                                    | TTL       | chr2q13          | Hs.358997 | 150465    |  | 0.046800 | -0.85 |
| 226114_at    | zinc finger protein 436                                                    | ZNF436    | chr1p36          | Hs.293798 | 80818     |  | 0.001271 | -0.85 |
| 211963_s_at  | actin related protein 2/3 complex, subunit 5, 16kDa                        | ARPC5     | chr1q25.3        | Hs.518609 | 10092     |  | 0.036344 | -0.85 |
| 214352_s_at  | v-Ki-ras2 Kirsten rat sarcoma viral oncogene homolog                       | KRAS      | chr12p12.1       | Hs.505033 | 3845      |  | 0.010152 | -0.85 |
| 236131_at    | Coatomer protein complex, subunit gamma 2                                  | COPG2     | chr7q32          | Hs.532231 | 26958     |  | 0.039171 | -0.85 |
| 208615_s_at  | protein tyrosine phosphatase type IVA, member 2                            | PTP4A2    | chr1p35          | Hs.470477 | 8073      |  | 0.044567 | -0.85 |
| 227624_at    | KIAA1546 protein                                                           | KIAA1546  | chr4q24          | Hs.531250 | 57667     |  | 0.002421 | -0.85 |
| 217738_at    | pre-B-cell colony enhancing factor 1                                       | PBEF1     | chr7q22.3        | Hs.489615 | 10135     |  | 0.018645 | -0.85 |
| 223854_at    | protocadherin beta 10                                                      | PCDHB10   | chr5q31          | Hs.145256 | 56126     |  | 0.035218 | -0.85 |
| 201384_s_at  | neighbor of BRCA1 gene 1                                                   | NBR1      | chr17q21.1       | Hs.277721 | 4077      |  | 0.017122 | -0.85 |
| 203962_s_at  | nebullette                                                                 | NEBL      | chr10p12         | Hs.5025   | 10529     |  | 0.020153 | -0.85 |
| 238360_s_at  | CDNA clone IMAGE:3877454, partial cds                                      |           |                  | Hs.451488 |           |  | 0.019263 | -0.85 |
| 225623_at    | KIAA1737                                                                   | KIAA1737  | chr14q24.3       | Hs.22452  | 85457     |  | 0.047899 | -0.85 |
| 225086_at    | Hypothetical protein FLJ38426                                              | FLJ38426  | chr15q14         | Hs.6799   | 283742    |  | 0.007893 | -0.86 |
| 211480_s_at  | solute carrier organic anion transporter family, member 1A2                | SLCO1A2   | chr12p12         | Hs.46440  | 6579      |  | 0.000462 | -0.86 |
| 226819_at    | LSM11, U7 small nuclear RNA associated                                     | LSM11     | chr5q33.3        | Hs.23648  | 134353    |  | 0.030643 | -0.86 |
| 1557953_at   | zinc finger with KRAB and SCAN domains 1                                   | ZKSCAN1   | chr7q21.3-q22.1  | Hs.423725 | 7586      |  | 0.010631 | -0.86 |
| 222558_at    | hypothetical protein FLJ10656                                              | P15RS     | chr18q12.2       | Hs.464912 | 55197     |  | 0.030233 | -0.86 |
| 225850_at    | chromosome 6 open reading frame 83                                         | C6orf83   | chr6q27          | Hs.487143 | 113402    |  | 0.030951 | -0.86 |
| 212249_at    | phosphoinositide-3-kinase, regulatory subunit 1 (p85 alpha)                | PIK3R1    | chr5q13.1        | Hs.132225 | 5295      |  | 0.012018 | -0.86 |
| 200605_s_at  | protein kinase, cAMP-dependent, regulatory, type I, alpha (tissue specif   | PRKAR1A   | chr17q23-q24     | Hs.280342 | 5573      |  | 0.031607 | -0.86 |
| 226276_at    | hypothetical protein MGC23909                                              | MGC23909  | chr5q14.2        | Hs.355606 | 153339    |  | 0.002082 | -0.86 |
| 214063_s_at  | transferrin                                                                | TF        | chr3q22.1        | Hs.518267 | 7018      |  | 0.048555 | -0.86 |
| 203801_at    | mitochondrial ribosomal protein S14                                        | MRPS14    | chr1q23-1q25     | Hs.247324 | 63931     |  | 0.024782 | -0.86 |
| 1557481_a_at | Chromosome 21 open reading frame 131                                       | C21orf131 | chr21            | Hs.547012 | 387486    |  | 0.012318 | -0.86 |
| 227605_at    | Small inducible cytokine subfamily E, member 1 (endothelial monocyte-      | SCYE1     | chr4q24          | Hs.480465 | 9255      |  | 0.023036 | -0.86 |

|              |                                                                                                      |               |                  |           |        |          |       |
|--------------|------------------------------------------------------------------------------------------------------|---------------|------------------|-----------|--------|----------|-------|
| 211671_s_at  | nuclear receptor subfamily 3, group C, member 1 (glucocorticoid receptor)                            | NR3C1         | chr5q31          | Hs.122926 | 2908   | 0.047499 | -0.86 |
| 243910_x_at  | CDNA FLJ30383 fis, clone BRACE2008102                                                                |               |                  | Hs.505983 |        | 0.028778 | -0.86 |
| 238417_at    | phosphoglucomutase 2-like 1                                                                          | PGM2L1        | chr11q13.4       | Hs.26612  | 283209 | 0.049150 | -0.86 |
| 202549_at    | VAMP (vesicle-associated membrane protein)-associated protein B and                                  | VAPB          | chr20q13         | Hs.182625 | 9217   | 0.020858 | -0.86 |
| 224581_s_at  | Nuclear ubiquitous casein kinase and cyclin-dependent kinase substrate                               | NUCKS         | chr1q32.1        | Hs.213061 | 64710  | 0.018955 | -0.86 |
| 235103_at    |                                                                                                      |               |                  |           |        | 0.000737 | -0.87 |
| 219683_at    | frizzled homolog 3 (Drosophila)                                                                      | FZD3          | chr8p21          | Hs.40735  | 7976   | 0.016085 | -0.87 |
| 229428_at    | CDNA FLJ40725 fis, clone TKIDN1000001, highly similar to Translocase of inner mitochondrial membrane |               |                  | Hs.536158 |        | 0.013632 | -0.87 |
| 1553749_at   | hypothetical protein MGC33371                                                                        | MGC33371      | chr11q21         | Hs.288304 | 143684 | 0.036429 | -0.87 |
| 218158_s_at  | adaptor protein containing pH domain, PTB domain and leucine zipper                                  | APPL          | chr3p21.1-p14.3  | Hs.476415 | 26060  | 0.005911 | -0.87 |
| 213117_at    | kelch-like 9 (Drosophila)                                                                            | KLHL9         | chr9p22          | Hs.522029 | 55958  | 0.002764 | -0.87 |
| 218185_s_at  | armadillo repeat containing 1                                                                        | ARMC1         | chr8q13.1        | Hs.269542 | 55156  | 0.005674 | -0.87 |
| 208358_s_at  | UDP glycosyltransferase 8 (UDP-galactose ceramide galactosyltransferase)                             | UGT8          | chr4q26          | Hs.144197 | 7368   | 0.000459 | -0.87 |
| 209574_s_at  | chromosome 18 open reading frame 1                                                                   | C18orf1       | chr18p11.2       | Hs.464697 | 753    | 0.019914 | -0.87 |
| 1558103_a_at | Transmembrane 6 superfamily member 1                                                                 | TM6SF1        | chr15q24-q26     | Hs.513094 | 53346  | 0.000428 | -0.87 |
| 217717_s_at  | tyrosine 3-monooxygenase/tryptophan 5-monooxygenase activation protein                               | YWHAH         | chr20q13.1       | Hs.279920 | 7529   | 0.017438 | -0.87 |
| 239580_at    | Homo sapiens, clone IMAGE:5302158, mRNA                                                              |               |                  | Hs.22247  |        | 0.025581 | -0.87 |
| 1555889_a_at | cartilage associated protein                                                                         | CRTAP         | chr3p22.3        | Hs.517888 | 10491  | 0.022807 | -0.87 |
| 235295_at    | Pannexin 1                                                                                           | PANX1         | chr11q21         | Hs.503584 | 24145  | 0.008735 | -0.87 |
| 226649_at    | pantothenate kinase 1                                                                                | PANK1         | chr10q23.31      | Hs.465933 | 53354  | 0.004937 | -0.87 |
| 1558541_at   | hypothetical protein FLJ36980                                                                        | FLJ36980      | chr8p22          | Hs.202521 | 286032 | 0.039443 | -0.88 |
| 212812_at    | CDNA: FLJ22642 fis, clone HSI06970                                                                   |               |                  | Hs.288232 |        | 0.023514 | -0.88 |
| 235465_at    | hypothetical protein FLJ25477                                                                        | FLJ25477      | chr13q12.13      | Hs.528335 | 219287 | 0.013894 | -0.88 |
| 218469_at    | gremlin 1 homolog, cysteine knot superfamily (Xenopus laevis)                                        | GREM1         | chr15q13-q15     | Hs.40098  | 26585  | 0.034668 | -0.88 |
| 225666_at    | hypothetical protein FLJ14624                                                                        | FLJ14624      | chr13q32.3       | Hs.190983 | 84899  | 0.040173 | -0.88 |
| 225178_at    | tetratricopeptide repeat domain 14                                                                   | TTC14         | chr3q26.33       | Hs.43213  | 151613 | 0.017465 | -0.88 |
| 210596_at    |                                                                                                      |               |                  |           |        | 0.006356 | -0.88 |
| 241698_at    | chromosome 2 open reading frame 11                                                                   | C2orf11       | chr2q33.1        | Hs.350388 | 130132 | 0.005942 | -0.88 |
| 225972_at    | Hypothetical protein DKFZp762C1112                                                                   | DKFZp762C1112 | chr8q21.3        | Hs.546514 | 169200 | 0.008651 | -0.88 |
| 230207_s_at  | Dedicator of cytokinesis 5                                                                           | DOCK5         | chr8p21.2        | Hs.195403 | 80005  | 0.025808 | -0.88 |
| 208849_at    |                                                                                                      |               |                  |           |        | 0.004652 | -0.88 |
| 218683_at    | polypyrimidine tract binding protein 2                                                               | PTBP2         | chr1p22.1-p21.3  | Hs.269895 | 58155  | 0.007454 | -0.88 |
| 1553101_a_at | hypothetical protein FLJ20308                                                                        | FLJ20308      | chr17p11.2       | Hs.462392 | 54890  | 0.037496 | -0.88 |
| 200732_s_at  | protein tyrosine phosphatase type IVA, member 1                                                      | PTP4A1        | chr6q12          | Hs.227777 | 7803   | 0.012034 | -0.89 |
| 204036_at    | endothelial differentiation, lysophosphatidic acid G-protein-coupled receptor                        | EDG2          | chr9q31.3        | Hs.126667 | 1902   | 0.034175 | -0.89 |
| 214579_at    | hypothetical protein DJ462023.2                                                                      | DJ462023.2    | chr1p36.12-p35.1 | Hs.523442 | 57185  | 0.038578 | -0.89 |
| 1558093_s_at | matrin 3                                                                                             | MATR3         | chr5q31.2        | Hs.268939 | 9782   | 0.034238 | -0.89 |
| 235067_at    | muskelin 1, intracellular mediator containing kelch motifs                                           | MKLN1         | chr7q32          | Hs.44693  | 4289   | 0.035409 | -0.89 |
| 212397_at    | radixin                                                                                              | RDX           | chr11q23         | Hs.263671 | 5962   | 0.018920 | -0.89 |
| 228486_at    | CDW92 antigen                                                                                        | CDW92         | chr9q31.2        | Hs.494700 | 23446  | 0.009542 | -0.89 |
| 1565601_at   | Protocadherin 9                                                                                      | PCDH9         | chr13q14.3-q21.1 | Hs.407643 | 5101   | 0.013231 | -0.89 |
| 202381_at    | a disintegrin and metalloproteinase domain 9 (meltrin gamma)                                         | ADAM9         | chr8p11.23       | Hs.2442   | 8754   | 0.003418 | -0.89 |
| 221310_at    | fibroblast growth factor 14                                                                          | FGF14         | chr13q34         | Hs.508616 | 2259   | 0.026219 | -0.89 |
| 212095_s_at  | mitochondrial tumor suppressor 1                                                                     | MTUS1         | chr8p22          | Hs.7946   | 57509  | 0.007200 | -0.89 |
| 220345_at    | leucine rich repeat transmembrane neuronal 4                                                         | LRRTM4        | chr2p12          | Hs.285782 | 80059  | 0.003884 | -0.89 |
| 218738_s_at  | ring finger protein 138                                                                              | RNF138        | chr18q12.1       | Hs.302408 | 51444  | 0.001211 | -0.90 |
| 205123_s_at  | transmembrane protein with EGF-like and two follistatin-like domains 1                               | TMEFF1        | chr9q31          | Hs.336224 | 8577   | 0.004895 | -0.90 |
| 227585_at    | ATPase family, AAA domain containing 1                                                               | ATAD1         | chr10q23.31      | Hs.435948 | 84896  | 0.028666 | -0.90 |
| 212417_at    | secretory carrier membrane protein 1                                                                 | SCAMP1        | chr5q13.3-q14.1  | Hs.482587 | 9522   | 0.011492 | -0.90 |
| 225885_at    | Early endosome antigen 1, 162kD                                                                      | EEA1          | chr12q22         | Hs.506309 | 8411   | 0.001025 | -0.90 |
| 230291_s_at  | Nuclear factor I/B                                                                                   | NFIB          | chr9p24.1        | Hs.370359 | 4781   | 0.018317 | -0.90 |
| 222451_s_at  | zinc finger, DHHC domain containing 9                                                                | ZDHHC9        | chrXq26.1        | Hs.193566 | 51114  | 0.008873 | -0.90 |
| 225539_at    | zinc finger protein 295                                                                              | ZNF295        | chr21q22.3       | Hs.434947 | 49854  | 0.042412 | -0.90 |
| 226533_at    |                                                                                                      |               |                  |           |        | 0.010435 | -0.90 |
| 224410_s_at  | chromosome 7 open reading frame 2 /// chromosome 7 open reading frame 2                              | C7orf2        | chr7q36          | Hs.549190 | 64327  | 0.007296 | -0.90 |
| 202393_s_at  | Kruppel-like factor 10                                                                               | KLF10         | chr8q22.2        | Hs.435001 | 7071   | 0.001307 | -0.90 |
| 208703_s_at  | amyloid beta (A4) precursor-like protein 2                                                           | APLP2         | chr11q23-q25.11  | Hs.370247 | 334    | 0.037745 | -0.90 |
| 211703_s_at  | beta-amyloid binding protein precursor /// beta-amyloid binding protein                              | BBP           | chr1p31.3        | Hs.276876 | 83941  | 0.013282 | -0.90 |
| 1565602_at   | Protocadherin 9                                                                                      | PCDH9         | chr13q14.3-q21.1 | Hs.407643 | 5101   | 0.004611 | -0.90 |
| 220462_at    | TGF-beta induced apoptosis protein 2                                                                 | TAIP-2        | chr2q24.3        | Hs.470479 | 80034  | 0.041649 | -0.91 |
| 242617_at    | Transmembrane emp24 domain containing 8                                                              | TMED8         | chr14q24.3       | Hs.547416 | 283578 | 0.013864 | -0.91 |
| 242019_at    | LAG1 longevity assurance homolog 6 (S. cerevisiae)                                                   | LASS6         | chr2q24.3        | Hs.506829 | 253782 | 0.019654 | -0.91 |
| 1552752_a_at | immunoglobulin superfamily, member 4D                                                                | IGSF4D        | chr3p12.1        | Hs.333991 | 253559 | 0.007062 | -0.91 |
| 236140_at    | glutamate-cysteine ligase, modifier subunit                                                          | GCLM          | chr1p22.1        | Hs.315562 | 2730   | 0.007716 | -0.91 |
| 205618_at    | proline rich Gla (G-carboxyglutamic acid) 1                                                          | PRRG1         | chrXp21.1        | Hs.190341 | 5638   | 0.005369 | -0.91 |
| 223020_at    | cisplatin resistance related protein CRR9p                                                           | CRR9          | chr5pter-p15.3   | Hs.444673 | 81037  | 0.042249 | -0.91 |
| 224888_at    | selenoprotein I                                                                                      | SELI          | chr2p23.3        | Hs.189073 | 85465  | 0.015206 | -0.91 |
| 227148_at    |                                                                                                      |               |                  |           |        | 0.044565 | -0.91 |
| 224352_s_at  | cofilin 2 (muscle) /// cofilin 2 (muscle)                                                            | CFL2          | chr14q12         | Hs.180141 | 1073   | 0.015139 | -0.92 |
| 210968_s_at  | reticulin 4                                                                                          | RTN4          | chr2p16.3        | Hs.429581 | 57142  | 0.026179 | -0.92 |
| 241859_at    |                                                                                                      |               |                  |           |        | 0.005137 | -0.92 |
| 204364_s_at  | chromosome 2 open reading frame 23                                                                   | C2orf23       | chr2p11.2        | Hs.368884 | 65055  | 0.039150 | -0.92 |
| 235017_s_at  | MRNA; cDNA DKFZp564E143 (from clone DKFZp564E143)                                                    |               |                  | Hs.452398 |        | 0.035370 | -0.92 |
| 224949_at    | golgi membrane protein SB140                                                                         | SMAP-5        | chr5q31.3        | Hs.372050 | 81555  | 0.021344 | -0.92 |

|              |                                                                          |           |                  |           |           |          |       |
|--------------|--------------------------------------------------------------------------|-----------|------------------|-----------|-----------|----------|-------|
| 225571_at    | Leukemia inhibitory factor receptor                                      | LIFR      | chr5p13-p12      | Hs.133421 | 3977      | 0.011908 | -0.92 |
| 204507_s_at  | protein phosphatase 3 (formerly 2B), regulatory subunit B, 19kDa, alpha  | PPP3R1    | chr2p15          | Hs.280604 | 5534      | 0.046088 | -0.92 |
| 226837_at    | sprouty-related, EVH1 domain containing 1                                | SPRED1    | chr15q14         | Hs.525781 | 161742    | 0.015565 | -0.92 |
| 204851_s_at  | doublecortin; lissencephaly, X-linked (doublecortin)                     | DCX       | chrXq22.3-q23    | Hs.34780  | 1641      | 0.046117 | -0.92 |
| 203998_s_at  | synaptotagmin I                                                          | SYT1      | chr12cen-q21     | Hs.310545 | 6857      | 0.022789 | -0.93 |
| 227856_at    | hypothetical protein FLJ39370                                            | FLJ39370  | chr4q25          | Hs.23439  | 132720    | 0.001432 | -0.93 |
| 210561_s_at  | WD repeat and SOCS box-containing 1                                      | WSB1      | chr17q11.1       | Hs.446017 | 26118     | 0.010997 | -0.93 |
| 228483_s_at  | CDNA FLJ23869 fis, clone LNG09860                                        |           |                  | Hs.522836 |           | 0.007711 | -0.93 |
| 212515_s_at  | DEAD (Asp-Glu-Ala-Asp) box polypeptide 3, X-linked                       | DDX3X     | chrXp11.3-p11.22 | Hs.380774 | 1654      | 0.040851 | -0.93 |
| 212353_at    | sulfatase 1                                                              | SULF1     | chr8q13.2-q13.3  | Hs.409602 | 23213     | 0.004417 | -0.93 |
| 233882_s_at  | sema domain, transmembrane domain (TM), and cytoplasmic domain, (        | SEMA6D    | chr15q21.1       | Hs.511265 | 80031     | 0.038267 | -0.93 |
| 224899_s_at  | implantation-associated protein                                          | DKFZp564  | chrXq21.1        | Hs.323562 | 84061     | 0.006369 | -0.93 |
| 235716_at    | Transformer-2 alpha                                                      | TRA2A     | chr7p15.3        | Hs.445652 | 29896     | 0.003592 | -0.93 |
| 205501_at    | CDNA FLJ25677 fis, clone TST04054                                        |           |                  | Hs.348762 |           | 0.006515 | -0.93 |
| 210896_s_at  | aspartate beta-hydroxylase                                               | ASPH      | chr8q12.1        | Hs.332422 | 444       | 0.022271 | -0.93 |
| 203100_s_at  | chromodomain protein, Y-like                                             | CDYL      | chr6p25.1        | Hs.269092 | 9425      | 0.006411 | -0.94 |
| 1552715_a_at | leucine-rich repeat-containing G protein-coupled receptor 7              | LGR7      | chr4q32.1        | Hs.196119 | 59350     | 0.022983 | -0.94 |
| 226106_at    | ring finger protein 141                                                  | RNF141    | chr11p15.4       | Hs.44685  | 50862     | 0.029479 | -0.94 |
| 1557137_at   | transmembrane protein 17                                                 | TMEM17    | chr2p15          | Hs.308028 | 200728    | 0.001328 | -0.94 |
| 218569_s_at  | kelch repeat and BTB (POZ) domain containing 4                           | KBTD4     | chr11p11.2       | Hs.440695 | 55709     | 0.021380 | -0.94 |
| 1559256_at   | BAI1-associated protein 1                                                | BAIAP1    | chr3p14.1        | Hs.169441 | 9223      | 0.005983 | -0.94 |
| 230263_s_at  | dedicator of cytokinesis 5                                               | DOCK5     | chr8p21.2        | Hs.195403 | 80005     | 0.028438 | -0.94 |
| 202843_at    | Dnaj (Hsp40) homolog, subfamily B, member 9                              | DNAJB9    | chr7q31 14q24.2  | Hs.6790   | 4189      | 0.002157 | -0.94 |
| 225097_at    | Homeodomain interacting protein kinase 2                                 | HIPK2     | chr7q32-q34      | Hs.397465 | 28996     | 0.040874 | -0.95 |
| 201986_at    | thyroid hormone receptor associated protein 1                            | THRAP1    | chr17q22-q23     | Hs.282678 | 9969      | 0.027486 | -0.95 |
| 202164_s_at  | CCR4-NOT transcription complex, subunit 8                                | CNOT8     | chr5q31-q33      | Hs.26703  | 9337      | 0.020079 | -0.95 |
| 202760_s_at  | A kinase (PRKA) anchor protein 2 /// PALM2-AKAP2 protein                 | AKAP2 /// | chr9q31-q33      | Hs.259461 | 11217 /// | 0.016443 | -0.95 |
| 208811_s_at  | Dnaj (Hsp40) homolog, subfamily B, member 6                              | DNAJB6    | chr7q36.3        | Hs.490745 | 10049     | 0.044717 | -0.95 |
| 1552790_a_at | Translocation protein 1                                                  | TLOC1     | chr3q26.2-q27    | Hs.529591 | 7095      | 0.007665 | -0.95 |
| 202589_at    | thymidylate synthetase                                                   | TYMS      | chr18p11.32      | Hs.369762 | 7298      | 0.025091 | -0.95 |
| 241403_at    | CDC-like kinase 4                                                        | CLK4      | chr5q35          | Hs.406557 | 57396     | 0.002324 | -0.95 |
| 224595_at    | CDW92 antigen                                                            | CDW92     | chr9q31.2        | Hs.494700 | 23446     | 0.034426 | -0.95 |
| 201096_s_at  | ADP-ribosylation factor 4                                                | ARF4      | chr3p21.2-p21.1  | Hs.148330 | 378       | 0.019187 | -0.95 |
| 219628_at    | p53 target zinc finger protein                                           | WIG1      | chr3q26.3-q27    | Hs.386299 | 64393     | 0.026203 | -0.96 |
| 201732_s_at  | chloride channel 3                                                       | CLCN3     | chr4q33          | Hs.481186 | 1182      | 0.005056 | -0.96 |
| 209301_at    | carbonic anhydrase II                                                    | CA2       | chr8q22          | Hs.155097 | 760       | 0.004873 | -0.96 |
| 206434_at    | sparc/osteonectin, cwcv and kazal-like domains proteoglycan (testican)   | SPOCK3    | chr4q32.3        | Hs.481133 | 50859     | 0.000557 | -0.96 |
| 214785_at    | vacuolar protein sorting 13A (yeast)                                     | VPS13A    | chr9q21          | Hs.459790 | 23230     | 0.005874 | -0.96 |
| 202137_s_at  | zinc finger, MYND domain containing 11                                   | ZMYND11   | chr10p14         | Hs.292265 | 10771     | 0.016855 | -0.96 |
| 209966_x_at  | estrogen-related receptor gamma                                          | ESRRG     | chr1q41          | Hs.444225 | 2104      | 0.010270 | -0.96 |
| 223775_at    | hedgehog interacting protein                                             | HHIP      | chr4q28-q32      | Hs.507991 | 64399     | 0.003744 | -0.96 |
| 226596_x_at  | Hypothetical gene supported by AK027125                                  |           | chr7p22.1        | Hs.552647 | 401307    | 0.004165 | -0.96 |
| 222880_at    | v-akt murine thymoma viral oncogene homolog 3 (protein kinase B, gamma)  | AKT3      | chr14q43-q44     | Hs.498292 | 10000     | 0.017511 | -0.96 |
| 231042_s_at  | Calcium/calmodulin-dependent protein kinase (CaM kinase) II delta        | CAMK2D    | chr4q26          | Hs.144114 | 817       | 0.024197 | -0.97 |
| 229083_at    | Heterogeneous nuclear ribonucleoprotein A0                               | HNRPA0    | chr5q31          | Hs.96996  | 10949     | 0.002071 | -0.97 |
| 231321_s_at  | Phytoceramide, alkaline                                                  | PHCA      | chr11q13.5       | Hs.23862  | 55331     | 0.037561 | -0.97 |
| 201647_s_at  | scavenger receptor class B, member 2                                     | SCARB2    | chr4q21.1        | Hs.349656 | 950       | 0.007246 | -0.97 |
| 203041_s_at  | lysosomal-associated membrane protein 2                                  | LAMP2     | chrXq24          | Hs.496684 | 3920      | 0.006118 | -0.97 |
| 231258_at    |                                                                          |           |                  |           |           | 0.020039 | -0.97 |
| 1565939_at   | Hypothetical protein FLJ11193                                            | FLJ11193  | chr5p13.3        | Hs.519246 | 55322     | 0.000684 | -0.97 |
| 1568574_x_at | Secreted phosphoprotein 1 (osteopontin, bone sialoprotein I, early T-lyn | SPP1      | chr4q21-q25      | Hs.313    | 6696      | 0.043200 | -0.97 |
| 201552_at    | lysosomal-associated membrane protein 1                                  | LAMP1     | chr13q34         | Hs.494419 | 3916      | 0.018317 | -0.97 |
| 226907_at    | protein phosphatase 1, regulatory (inhibitor) subunit 14C                | PPP1R14C  | chr6q24.3-q25.3  | Hs.486798 | 81706     | 0.040415 | -0.98 |
| 217777_s_at  | butyrate-induced transcript 1                                            | HSPC121   | chr15q22.2       | Hs.512973 | 51495     | 0.026875 | -0.98 |
| 241752_at    | solute carrier family 8 (sodium/calcium exchanger), member 1             | SLC8A1    | chr2p23-p22      | Hs.468274 | 6546      | 0.024952 | -0.98 |
| 220238_s_at  | kelch-like 7 (Drosophila)                                                | KLHL7     | chr7p15.3        | Hs.385861 | 55975     | 0.007286 | -0.98 |
| 214817_at    | unc-13 homolog A (C. elegans)                                            | UNC13A    | chr19p13.11      | Hs.164502 | 23025     | 0.042404 | -0.98 |
| 1558373_s_at | CDNA FLJ34038 fis, clone FCBBF2005645                                    |           |                  | Hs.530150 |           | 0.040584 | -0.98 |
| 202602_s_at  | HIV TAT specific factor 1                                                | HTATSF1   | chrXq26.1-q27.2  | Hs.204475 | 27336     | 0.026990 | -0.98 |
| 203115_at    | ferrochelatase (protoporphyrin)                                          | FECH      | chr18q21.3       | Hs.465221 | 2235      | 0.016238 | -0.98 |
| 238212_at    | Clone IMAGE:501887, mRNA sequence                                        |           |                  | Hs.551985 |           | 0.044015 | -0.98 |
| 231167_at    | Transcribed locus                                                        |           |                  | Hs.531813 |           | 0.014790 | -0.99 |
| 225099_at    | F-box protein 45                                                         | FBXO45    | chr3q29          | Hs.518526 | 200933    | 0.020553 | -0.99 |
| 200745_s_at  | guanine nucleotide binding protein (G protein), beta polypeptide 1       | GNB1      | chr13q36.33      | Hs.430425 | 2782      | 0.043185 | -0.99 |
| 209344_at    | tropomyosin 4                                                            | TPM4      | chr19p13.1       | Hs.466088 | 7171      | 0.006381 | -1.00 |
| 225383_at    | zinc finger protein 275                                                  | ZNF275    | chrXq28          | Hs.348963 | 10838     | 0.003089 | -1.00 |
| 206794_at    | v-erb-a erythroblastic leukemia viral oncogene homolog 4 (avian)         | ERBB4     | chr2q33.3-q34    | Hs.390729 | 2066      | 0.007129 | -1.00 |
| 238487_at    | Hypothetical protein LOC285831                                           | LOC28583  | chr6p21.32       | Hs.550038 | 285831    | 0.045236 | -1.00 |
| 226636_at    | phospholipase D1, phosphatidylcholine-specific                           | PLD1      | chr3q26          | Hs.478230 | 5337      | 0.012558 | -1.01 |
| 1559310_at   | CDNA FLJ30875 fis, clone FEBRA2004331                                    |           |                  | Hs.493804 |           | 0.029243 | -1.01 |
| 231873_at    | bone morphogenetic protein receptor, type II (serine/threonine kinase)   | BMPR2     | chr2q33-q34      | Hs.471119 | 659       | 0.010238 | -1.01 |
| 223010_s_at  | OClA domain containing 1                                                 | OClAD1    | chr4p11          | Hs.518750 | 54940     | 0.028489 | -1.01 |
| 204567_s_at  | ATP-binding cassette, sub-family G (WHITE), member 1                     | ABCG1     | chr21q22.3       | Hs.124649 | 9619      | 0.013915 | -1.01 |
| 213069_at    | HEG homolog 1 (zebrafish)                                                | HEG       | chr3q21.2        | Hs.477420 | 57493     | 0.024820 | -1.01 |

|              |                                                                            |                    |                     |           |               |          |       |
|--------------|----------------------------------------------------------------------------|--------------------|---------------------|-----------|---------------|----------|-------|
| 225998_at    | GRB2-associated binding protein 1                                          | GAB1               | chr4q31.21          | Hs.80720  | 2549          | 0.011398 | -1.01 |
| 226005_at    | Ubiquitin-conjugating enzyme E2G 1 (UBC7 homolog, C. elegans)              | UBE2G1             | chr1q42             | Hs.462035 | 7326          | 0.002729 | -1.01 |
| 203354_s_at  | pleckstrin and Sec7 domain containing 3                                    | PSD3               | chr8pter-p23.3      | Hs.434255 | 23362         | 0.016623 | -1.01 |
| 237802_at    | KIAA1889 protein                                                           | KIAA1889           | chr8q12.1           | Hs.130197 | 114786        | 0.031360 | -1.01 |
| 203527_s_at  | adenomatous polyposis coli                                                 | APC                | chr5q21-q22         | Hs.158932 | 324           | 0.006200 | -1.02 |
| 229642_at    | Rho guanine nucleotide exchange factor (GEF) 7                             | ARHGEF7            | chr13q34            | Hs.508738 | 8874          | 0.048250 | -1.02 |
| 229713_at    | CDNA FLJ13267 fis, clone OVARC1000964                                      |                    |                     | Hs.57079  |               | 0.001103 | -1.02 |
| 226025_at    | CDNA clone IMAGE:3542720                                                   |                    |                     | Hs.547037 |               | 0.013739 | -1.02 |
| 219750_at    | hypothetical protein FLJ11155                                              | FLJ11155           | chr4q32.1           | Hs.176227 | 55314         | 0.002161 | -1.02 |
| 240169_at    | Full length insert cDNA clone YO64F11                                      |                    |                     | Hs.32118  |               | 0.017301 | -1.02 |
| 203300_x_at  | adaptor-related protein complex 1, sigma 2 subunit                         | AP1S2              | chrXp22.2           | Hs.121592 | 8905          | 0.003935 | -1.02 |
| 222875_at    | DEAH (Asp-Glu-Ala-His) box polypeptide 33                                  | DHX33              | chr17p13.2          | Hs.250456 | 56919         | 0.016961 | -1.03 |
| 214670_at    | zinc finger with KRAB and SCAN domains 1                                   | ZKSCAN1            | chr7q21.3-q22.1     | Hs.423725 | 7586          | 0.002381 | -1.03 |
| 203638_s_at  | fibroblast growth factor receptor 2 (bacteria-expressed kinase, keratin)   | FGFR2              | chr10q26            | Hs.533683 | 2263          | 0.020262 | -1.03 |
| 212568_s_at  | dihydroliipoamide S-acetyltransferase (E2 component of pyruvate dehyd      | DLAT               | chr11q23.1          | Hs.335551 | 1737          | 0.006903 | -1.03 |
| 227289_at    | hypothetical protein LOC144997                                             | LOC144997          | chr13q14.3          |           | 144997        | 0.025652 | -1.03 |
| 223341_s_at  | short coiled-coil protein                                                  | SCOC               | chr4q31.1           | Hs.480815 | 60592         | 0.001502 | -1.04 |
| 1558279_a_at | Follicular lymphoma variant translocation 1                                | FVT1               | chr18q21.3          | Hs.74050  | 2531          | 0.011414 | -1.05 |
| 230057_at    | hypothetical protein LOC285178                                             | LOC285178          | chr2q35             | Hs.28102  | 285178        | 0.022659 | -1.05 |
| 224778_s_at  | CDNA clone IMAGE:5263531, partial cds                                      |                    |                     | Hs.399763 |               | 0.025283 | -1.06 |
| 203758_at    | cathepsin O                                                                | CTSO               | chr4q31-q32         | Hs.75262  | 1519          | 0.006700 | -1.06 |
| 234000_s_at  | butyrate-induced transcript 1                                              | HSPC121            | chr15q22.2          | Hs.512973 | 51495         | 0.015322 | -1.06 |
| 231898_x_at  | SOX2 overlapping transcript (non-coding RNA)                               | SOX2OT             | chr3q26.3-q27       | Hs.546551 | 347689        | 0.000798 | -1.06 |
| 1553194_at   | neuronal growth regulator 1                                                | NEGR1              | chr1p31.1           | Hs.146542 | 257194        | 0.010208 | -1.06 |
| 231866_at    | Leucyl/cystinyl aminopeptidase                                             | LNPEP              | chr5q15             | Hs.551507 | 4012          | 0.012553 | -1.06 |
| 213362_at    | Protein tyrosine phosphatase, receptor type, D                             | PTPRD              | chr9p23-p24.3       | Hs.446083 | 5789          | 0.040375 | -1.06 |
| 226932_at    | Sarcospan (Kras oncogene-associated gene)                                  | SSPN               | chr12p11.2          | Hs.183428 | 8082          | 0.021266 | -1.06 |
| 201918_at    | Hypothetical protein FLJ10618                                              | FLJ10618           | chr3q23             | Hs.144130 | 55186         | 0.022797 | -1.06 |
| 211967_at    | pro-oncosis receptor inducing membrane injury gene                         | PORIMIN            | chr11q22.1          | Hs.503709 | 114908        | 0.001224 | -1.07 |
| 227100_at    | beta 3-glycosyltransferase-like                                            | B3GTL              | chr13q12.3          | Hs.13205  | 145173        | 0.008237 | -1.07 |
| 1555226_s_at | chromosome 1 open reading frame 43                                         | C1orf43            | chr1q21.2           | Hs.287471 | 25912         | 0.048212 | -1.07 |
| 209896_s_at  | protein tyrosine phosphatase, non-receptor type 11 (Noonan syndrome        | PTPN11             | chr12q24            | Hs.506852 | 5781          | 0.026819 | -1.08 |
| 213033_s_at  | Nuclear factor I/B                                                         | NFIB               | chr9p24.1           | Hs.370359 | 4781          | 0.008588 | -1.08 |
| 238985_at    |                                                                            |                    |                     |           |               | 0.020371 | -1.08 |
| 206376_at    | solute carrier family 6, member 15                                         | SLC6A15            | chr12q21.3          | Hs.44424  | 55117         | 0.012499 | -1.08 |
| 211547_s_at  | platelet-activating factor acetylhydrolase, isoform Ib, alpha subunit 45kD | PAFAH1B1           | chr17p13.3          | Hs.77318  | 5048          | 0.009241 | -1.09 |
| 219594_at    | ninjurin 2                                                                 | NINJ2              | chr12p13            | Hs.504422 | 4815          | 0.027091 | -1.09 |
| 230577_at    |                                                                            |                    |                     |           |               | 0.026248 | -1.09 |
| 213110_s_at  | collagen, type IV, alpha 5 (Alport syndrome)                               | COL4A5             | chrXq22             | Hs.369089 | 1287          | 0.020255 | -1.10 |
| 223168_at    | ras homolog gene family, member U                                          | RHOU               | chr1q42.11-q42.3    | Hs.435106 | 58480         | 0.040109 | -1.10 |
| 1554462_a_at | DnaJ (Hsp40) homolog, subfamily B, member 9                                | DNAJB9             | chr7q31 14q24.2     | Hs.6790   | 4189          | 0.002042 | -1.10 |
| 230360_at    | collomin                                                                   | COLM               | chr15q21.2          | Hs.526441 | 342035        | 0.021472 | -1.11 |
| 206135_at    | suppression of tumorigenicity 18 (breast carcinoma) (zinc finger protein   | ST18               | chr8q11.23          | Hs.549092 | 9705          | 0.010533 | -1.11 |
| 231193_s_at  | CDNA clone IMAGE:5263531, partial cds                                      |                    |                     | Hs.399763 |               | 0.017357 | -1.11 |
| 200821_at    | lysosomal-associated membrane protein 2                                    | LAMP2              | chrXq24             | Hs.496684 | 3920          | 0.026712 | -1.12 |
| 218970_s_at  | cutC copper transporter homolog (E.coli)                                   | CUTC               | chr10q24.2          | Hs.16606  | 51076         | 0.037952 | -1.13 |
| 201485_s_at  | reticulocalbin 2, EF-hand calcium binding domain                           | RCN2               | chr15q23            | Hs.79088  | 5955          | 0.034042 | -1.13 |
| 222404_x_at  | butyrate-induced transcript 1                                              | HSPC121            | chr15q22.2          | Hs.512973 | 51495         | 0.020356 | -1.13 |
| 221895_at    | motile sperm domain containing 2                                           | MOSPD2             | chrXp22.2           | Hs.190043 | 158747        | 0.002532 | -1.14 |
| 221911_at    | ets variant gene 1 /// hypothetical protein LOC22181C                      | ETV1 /// LOC22181C | chr7p22 /// chr7p22 | Hs.22634  | 2115 /// 2115 | 0.021642 | -1.14 |
| 222608_s_at  | anillin, actin binding protein (scraps homolog, Drosophila)                | ANLN               | chr7p15-p14         | Hs.62180  | 54443         | 0.003379 | -1.14 |
| 205105_at    | mannosidase, alpha, class 2A, member 1                                     | MAN2A1             | chr5q21-q22         | Hs.432822 | 4124          | 0.031997 | -1.14 |
| 223059_s_at  | chromosome 10 open reading frame 45                                        | C10orf45           | chr10p13            | Hs.446315 | 83641         | 0.036392 | -1.15 |
| 222538_s_at  | adaptor protein containing pH domain, PTB domain and leucine zipper n      | APPL               | chr3p21.1-p14.3     | Hs.476415 | 26060         | 0.006668 | -1.15 |
| 222850_s_at  | hypothetical protein FLJ14281                                              | FLJ14281           | chr4q23             | Hs.512743 | 79982         | 0.018627 | -1.15 |
| 202747_s_at  | integral membrane protein 2A                                               | ITM2A              | chrXq13.3-Xq21.2    | Hs.17109  | 9452          | 0.025197 | -1.15 |
| 217721_at    | Septin 7                                                                   | 38967              | chr7p14.3-p14.1     | Hs.191346 | 989           | 0.044910 | -1.16 |
| 212698_s_at  | septin 10                                                                  | 38970              | chr2q13             | Hs.469615 | 151011        | 0.002512 | -1.17 |
| 206849_at    | gamma-aminobutyric acid (GABA) A receptor, gamma 2                         | GABRG2             | chr5q31.1-q33.1     | Hs.7195   | 2566          | 0.012169 | -1.17 |
| 225308_s_at  | TPR domain, ankyrin-repeat and coiled-coil-containing                      | TANC               | chr2q24.2           | Hs.61590  | 85461         | 0.004410 | -1.18 |
| 205801_s_at  | RAS guanyl releasing protein 3 (calcium and DAG-regulated)                 | RASGRP3            | chr2p25.1-p24.1     | Hs.143674 | 25780         | 0.000040 | -1.18 |
| 230135_at    | CDNA FLJ42405 fis, clone ASTRO3000474                                      |                    |                     | Hs.548089 |               | 0.004112 | -1.19 |
| 229781_at    | LOC442530                                                                  |                    | chr7                | Hs.304253 | 442530        | 0.010417 | -1.19 |
| 201005_at    | CD9 antigen (p24)                                                          | CD9                | chr12p13.3          | Hs.114286 | 928           | 0.019069 | -1.19 |
| 212341_at    | hypothetical protein MGC21416                                              | MGC21416           | chrXq13.1           | Hs.82719  | 286451        | 0.004826 | -1.19 |
| 237333_at    | Syncoilin, intermediate filament 1                                         | SYNCOILIN          | chr1p34.3-p33       | Hs.550537 | 81493         | 0.012033 | -1.20 |
| 204484_at    | phosphoinositide-3-kinase, class 2, beta polypeptide                       | PIK3C2B            | chr1q32             | Hs.497487 | 5287          | 0.009591 | -1.20 |
| 216231_s_at  | beta-2-microglobulin                                                       | B2M                | chr15q21-q22.2      | Hs.534255 | 567           | 0.004945 | -1.21 |
| 1558028_x_at | HLA complex group 11                                                       | HCG11              | chr6p21             | Hs.272939 | 493812        | 0.005646 | -1.21 |
| 221859_at    | synaptotagmin XIII                                                         | SYT13              | chr11p12-p11        | Hs.436643 | 57586         | 0.004114 | -1.21 |
| 217893_s_at  | hypothetical protein FLJ12666                                              | FLJ12666           | chr1p34.3           | Hs.293563 | 79647         | 0.021793 | -1.22 |
| 223243_s_at  | chromosome 1 open reading frame 22                                         | C1orf22            | chr1q24-q25         | Hs.523811 | 80267         | 0.003994 | -1.22 |
| 1558414_at   | chromosome 9 open reading frame 4                                          | C9orf4             | chr9q31             | Hs.347537 | 23732         | 0.008975 | -1.23 |
| 1552789_at   | Translocation protein 1                                                    | TLOC1              | chr3q26.2-q27       | Hs.529591 | 7095          | 0.008182 | -1.23 |



|              |                                                                             |               |                  |           |        |  |                 |              |
|--------------|-----------------------------------------------------------------------------|---------------|------------------|-----------|--------|--|-----------------|--------------|
| 209535_s_at  |                                                                             |               |                  |           |        |  | <b>0.012348</b> | <b>-1.24</b> |
| 232893_at    | hypothetical protein DKFZp434H2226                                          | DKFZp434H2226 | chr5p13.2        | Hs.294103 | 92255  |  | <b>0.027878</b> | <b>-1.24</b> |
| 204774_at    | ecotropic viral integration site 2A                                         | EVI2A         | chr17q11.2       | Hs.113874 | 2123   |  | <b>0.023158</b> | <b>-1.24</b> |
| 207791_s_at  | RAB1A, member RAS oncogene family                                           | RAB1A         | chr2p14          | Hs.310645 | 5861   |  | <b>0.029154</b> | <b>-1.24</b> |
| 203799_at    | CD302 antigen                                                               | CD302         | chr2q24.2        | Hs.130014 | 9936   |  | <b>0.008175</b> | <b>-1.25</b> |
| 244439_at    | sprouty-related, EVH1 domain containing 1                                   | SPRED1        | chr15q14         | Hs.525781 | 161742 |  | <b>0.019187</b> | <b>-1.27</b> |
| 1558972_s_at | chromosome 6 open reading frame 190                                         | C6orf190      | chr6q22.33       | Hs.380210 | 387357 |  | <b>0.022483</b> | <b>-1.27</b> |
| 208925_at    | chromosome 3 open reading frame 4                                           | C3orf4        | chr3p11-q11      | Hs.107393 | 56650  |  | <b>0.026537</b> | <b>-1.27</b> |
| 218342_s_at  | KIAA1815                                                                    | KIAA1815      | chr9p24          | Hs.87128  | 79956  |  | <b>0.004785</b> | <b>-1.28</b> |
| 210338_s_at  | heat shock 70kDa protein 8                                                  | HSPA8         | chr11q24.1       | Hs.180414 | 3312   |  | <b>0.021407</b> | <b>-1.28</b> |
| 1555882_at   | spindlin family, member 3                                                   | SPIN3         | chrXp11.1        | Hs.522672 | 169981 |  | <b>0.030451</b> | <b>-1.28</b> |
| 228485_s_at  | CDW92 antigen                                                               | CDW92         | chr9q31.2        | Hs.494700 | 23446  |  | <b>0.005506</b> | <b>-1.29</b> |
| 231911_at    | KIAA1189                                                                    | KIAA1189      | chr2q24.1        | Hs.443894 | 57471  |  | <b>0.009429</b> | <b>-1.30</b> |
| 219732_at    | plasticity related gene 3                                                   | PRG-3         | chr9q31.1        | Hs.382683 | 54886  |  | <b>0.003302</b> | <b>-1.31</b> |
| 225961_at    | kelch domain containing 5                                                   | KLHDC5        | chr12p11.22      | Hs.505104 | 57542  |  | <b>0.017293</b> | <b>-1.32</b> |
| 226109_at    |                                                                             |               |                  |           |        |  | <b>0.004032</b> | <b>-1.33</b> |
| 209631_s_at  | G protein-coupled receptor 37 (endothelin receptor type B-like)             | GPR37         | chr7q31          | Hs.406094 | 2861   |  | <b>0.001127</b> | <b>-1.34</b> |
| 205799_s_at  | solute carrier family 3 (cystine, dibasic and neutral amino acid transport) | SLC3A1        | chr2p16.3        | Hs.112916 | 6519   |  | <b>0.026598</b> | <b>-1.34</b> |
| 1558971_at   | chromosome 6 open reading frame 190                                         | C6orf190      | chr6q22.33       | Hs.380210 | 387357 |  | <b>0.008886</b> | <b>-1.35</b> |
| 209392_at    | ectonucleotide pyrophosphatase/phosphodiesterase 2 (autotaxin)              | ENPP2         | chr8q24.1        | Hs.190977 | 5168   |  | <b>0.001722</b> | <b>-1.35</b> |
| 1555247_a_at | Rap guanine nucleotide exchange factor (GEF) 6                              | RAPGEF6       | chr5q23.3        |           | 51735  |  | <b>0.011516</b> | <b>-1.35</b> |
| 228335_at    | claudin 11 (oligodendrocyte transmembrane protein)                          | CLDN11        | chr3q26.2-q26.3  | Hs.31595  | 5010   |  | <b>0.012801</b> | <b>-1.41</b> |
| 210839_s_at  | ectonucleotide pyrophosphatase/phosphodiesterase 2 (autotaxin)              | ENPP2         | chr8q24.1        | Hs.190977 | 5168   |  | <b>0.006850</b> | <b>-1.43</b> |
| 214724_at    | DIX domain containing 1                                                     | DIXDC1        |                  | Hs.116796 | 85458  |  | <b>0.008050</b> | <b>-1.44</b> |
| 212040_at    | trans-golgi network protein 2                                               | TGOLN2        | chr2p11.2        | Hs.14894  | 10618  |  | <b>0.003954</b> | <b>-1.44</b> |
| 222111_at    | Hypothetical protein KIAA1164                                               | KIAA1164      | chr15q21.3       | Hs.368548 | 54629  |  | <b>0.003145</b> | <b>-1.45</b> |
| 1559129_a_at | hypothetical protein LOC158257                                              | LOC158257     | chr9q22.32       | Hs.213065 | 158257 |  | <b>0.030619</b> | <b>-1.46</b> |
| 241685_x_at  | Transcribed locus                                                           |               |                  | Hs.200938 |        |  | <b>0.003678</b> | <b>-1.46</b> |
| 232282_at    | WNK lysine deficient protein kinase 3                                       | WNK3          | chrXp11.23-p11.2 | Hs.92423  | 65267  |  | <b>0.005867</b> | <b>-1.50</b> |
| 204719_at    | ATP-binding cassette, sub-family A (ABC1), member 8                         | ABCA8         | chr17q24         | Hs.58351  | 10351  |  | <b>0.027228</b> | <b>-1.54</b> |
| 207014_at    | gamma-aminobutyric acid (GABA) A receptor, alpha 2                          | GABRA2        | chr4p12          | Hs.116250 | 2555   |  | <b>0.011483</b> | <b>-1.58</b> |
| 210198_s_at  | proteolipid protein 1 (Pelizaeus-Merzbacher disease, spastic paraplegia)    | PLP1          | chrXq22          | Hs.1787   | 5354   |  | <b>0.010272</b> | <b>-1.59</b> |
| 214586_at    | G protein-coupled receptor 37 (endothelin receptor type B-like)             | GPR37         | chr7q31          | Hs.406094 | 2861   |  | <b>0.004829</b> | <b>-1.65</b> |
| 206941_x_at  | sema domain, immunoglobulin domain (Ig), short basic domain, secreted       | SEMA3E        | chr7q21.11       | Hs.528721 | 9723   |  | <b>0.001244</b> | <b>-1.68</b> |
| 228624_at    | hypothetical protein FLJ11155                                               | FLJ11155      | chr4q32.1        | Hs.176227 | 55314  |  | <b>0.021280</b> | <b>-1.76</b> |
| 228956_at    | UDP glycosyltransferase 8 (UDP-galactose ceramide galactosyltransferase)    | UGT8          | chr4q26          | Hs.144197 | 7368   |  | <b>0.000562</b> | <b>-1.80</b> |
| 203400_s_at  | transferrin                                                                 | TF            | chr3q22.1        | Hs.518267 | 7018   |  | <b>0.033866</b> | <b>-1.90</b> |
| 203348_s_at  | ets variant gene 5 (ets-related molecule)                                   | ETV5          | chr3q28          | Hs.43697  | 2119   |  | <b>0.004449</b> | <b>-2.00</b> |
