# Supplementary material
Source: PubMed Central journal article supplement (PMC2823856)
Supplement: NIHMS167684-supplement-03.pdf [file NIHMS167684-supplement-03.pdf]

**Suppl Mat 3. 158 SG-enriched (red) and 226 IG-enriched transcripts (green)**

| Probe        | Gene Name                                                              | Symbol    | Unigene   | Ttest Pair | Ttest Grp | ALR SG-IG | Fold  |
|--------------|------------------------------------------------------------------------|-----------|-----------|------------|-----------|-----------|-------|
| 213920_at    | cut-like 2 (Drosophila)                                                | CUTL2     | Hs.124953 | 0.00000    | 0.00000   | 4.80      | 27.94 |
| 206339_at    | cocaine- and amphetamine-regulated transcript                          | CART      | Hs.1707   | 0.00000    | 0.00000   | 3.80      | 13.96 |
| 205625_s_at  | calbindin 1, 28kDa                                                     | CALB1     | Hs.65425  | 0.00000    | 0.00000   | 3.34      | 10.16 |
| 205626_s_at  | calbindin 1, 28kDa                                                     | CALB1     | Hs.65425  | 0.00000    | 0.00000   | 3.23      | 9.36  |
| 206935_at    | protocadherin 8                                                        | PCDH8     | Hs.19492  | 0.00000    | 0.00000   | 3.17      | 9.00  |
| 231391_at    | CDNA clone IMAGE:4611512, partial cds                                  |           | Hs.66194  | 0.00000    | 0.00000   | 2.80      | 6.98  |
| 219463_at    | chromosome 20 open reading frame 103                                   | C20orf103 | Hs.22920  | 0.00000    | 0.00000   | 2.77      | 6.84  |
| 1557475_at   | CDNA clone IMAGE:5274197, partial cds                                  |           | Hs.385496 | 0.00000    | 0.00000   | 2.62      | 6.13  |
| 243337_at    | FRAS1 related extracellular matrix 3                                   | FREM3     | Hs.252714 | 0.00000    | 0.00000   | 2.60      | 6.06  |
| 243582_at    | SH3 domain containing ring finger 2                                    | SH3RF2    | Hs.443728 | 0.00000    | 0.00000   | 2.34      | 5.06  |
| 230237_at    | Adenylate cyclase activating polypeptide 1 (pituitary)                 | ADCYAP1   | Hs.531719 | 0.00000    | 0.00000   | 2.27      | 4.84  |
| 221729_at    | collagen, type V, alpha 2                                              | COL5A2    | Hs.445827 | 0.00000    | 0.00000   | 2.27      | 4.81  |
| 205923_at    | reelin                                                                 | RELN      | Hs.132439 | 0.00000    | 0.00000   | 2.24      | 4.73  |
| 1552519_at   | activin A receptor, type IC                                            | ACVR1C    | Hs.352338 | 0.00000    | 0.00000   | 2.24      | 4.72  |
| 215695_s_at  | glycogenin 2                                                           | GYG2      | Hs.541209 | 0.00000    | 0.00001   | 2.22      | 4.65  |
| 229247_at    | hypothetical protein FLJ37440                                          | FLJ37440  | Hs.437696 | 0.00000    | 0.00007   | 2.09      | 4.27  |
| 243969_at    | solute carrier family 24 (sodium/potassium/calcium exchanger)          | SLC24A4   | Hs.510281 | 0.00000    | 0.00000   | 2.09      | 4.25  |
| 238309_x_at  | CDNA FLJ44654 fis, clone BRACE2047232                                  |           | Hs.128823 | 0.00000    | 0.00003   | 2.07      | 4.21  |
| 1568870_at   | Homo sapiens, clone IMAGE:4818211, mRNA                                |           | Hs.385530 | 0.00000    | 0.00000   | 2.06      | 4.17  |
| 221730_at    | collagen, type V, alpha 2                                              | COL5A2    | Hs.445827 | 0.00004    | 0.00000   | 2.04      | 4.10  |
| 205428_s_at  | calbindin 2, 29kDa (calretinin)                                        | CALB2     | Hs.106857 | 0.00000    | 0.00000   | 2.03      | 4.10  |
| 1556128_a_at | Ras protein-specific guanine nucleotide-releasing factor 2             | RASGRF2   | Hs.162129 | 0.00000    | 0.00000   | 2.00      | 4.01  |
| 222484_s_at  | chemokine (C-X-C motif) ligand 14                                      | CXCL14    | Hs.483444 | 0.00000    | 0.00000   | 2.00      | 3.99  |
| 1560692_at   | hypothetical protein LOC285878                                         | LOC285878 | Hs.548149 | 0.00000    | 0.00000   | 1.99      | 3.97  |
| 203510_at    | met proto-oncogene (hepatocyte growth factor receptor)                 | MET       | Hs.132966 | 0.00009    | 0.00000   | 1.99      | 3.96  |
| 213894_at    | KIAA0960 protein                                                       | KIAA0960  | Hs.120855 | 0.00000    | 0.00000   | 1.94      | 3.84  |
| 228109_at    | Ras protein-specific guanine nucleotide-releasing factor 2             | RASGRF2   | Hs.162129 | 0.00000    | 0.00000   | 1.90      | 3.73  |
| 214920_at    | hypothetical protein LOC221981                                         | LOC221981 |           | 0.00000    | 0.00000   | 1.89      | 3.71  |
| 201063_at    | reticulocalbin 1, EF-hand calcium binding domain                       | RCN1      | Hs.97887  | 0.00000    | 0.00000   | 1.88      | 3.68  |
| 1554530_at   | hypothetical protein MGC33530                                          | MGC33530  | Hs.335933 | 0.00000    | 0.00000   | 1.83      | 3.57  |
| 1563182_at   | CDNA clone IMAGE:4796641, partial cds                                  |           | Hs.541710 | 0.00000    | 0.00000   | 1.82      | 3.53  |
| 229159_at    | KIAA0960 protein                                                       | KIAA0960  | Hs.120855 | 0.00000    | 0.00000   | 1.80      | 3.47  |
| 230008_at    | hypothetical protein LOC221981                                         | LOC221981 |           | 0.00000    | 0.00000   | 1.78      | 3.43  |
| 222953_at    | G protein-coupled receptor 83                                          | GPR83     | Hs.272385 | 0.00000    | 0.00000   | 1.77      | 3.40  |
| 230109_at    | phosphodiesterase 7B                                                   | PDE7B     | Hs.546364 | 0.00000    | 0.00000   | 1.73      | 3.33  |
| 233095_at    | CDNA FLJ10095 fis, clone HEMBA1002430                                  |           | Hs.272208 | 0.00000    | 0.00000   | 1.73      | 3.32  |
| 233135_at    | Homo sapiens, clone IMAGE:4820713, mRNA /// Homo sapiens, clone IM     |           | Hs.535863 | 0.00000    | 0.00000   | 1.71      | 3.27  |
| 230117_at    | hypothetical protein LOC285878                                         | LOC285878 | Hs.548149 | 0.00000    | 0.00000   | 1.69      | 3.22  |
| 1553864_at   | hypothetical protein DKFZp761H2121                                     | DKFZp761  | Hs.134065 | 0.00000    | 0.00000   | 1.67      | 3.19  |
| 236902_at    | CDNA FLJ37214 fis, clone BRALZ2008484                                  |           | Hs.445241 | 0.00000    | 0.00000   | 1.66      | 3.16  |
| 230238_at    | hypothetical protein LOC134548                                         | LOC134548 | Hs.13308  | 0.00000    | 0.00000   | 1.66      | 3.16  |
| 206204_at    | growth factor receptor-bound protein 14                                | GRB14     | Hs.411881 | 0.00000    | 0.00000   | 1.65      | 3.14  |
| 232275_s_at  | heparan sulfate 6-O-sulfotransferase 3                                 | HS6ST3    | Hs.171001 | 0.00000    | 0.00000   | 1.64      | 3.12  |
| 218002_s_at  | chemokine (C-X-C motif) ligand 14                                      | CXCL14    | Hs.483444 | 0.00000    | 0.00007   | 1.64      | 3.12  |
| 236374_at    | CDNA clone IMAGE:4611512, partial cds                                  |           | Hs.66194  | 0.00000    | 0.00000   | 1.64      | 3.11  |
| 236308_at    | hypothetical protein LOC285878                                         | LOC285878 | Hs.548149 | 0.00000    | 0.00000   | 1.63      | 3.09  |
| 232276_at    | heparan sulfate 6-O-sulfotransferase 3                                 | HS6ST3    | Hs.171001 | 0.00000    | 0.00000   | 1.59      | 3.01  |
| 203416_at    | CD53 antigen                                                           | CD53      | Hs.443057 | 0.00000    | 0.00000   | 1.58      | 2.98  |
| 212768_s_at  | olfactomedin 4                                                         | OLFM4     | Hs.508113 | 0.00000    | 0.00000   | 1.57      | 2.98  |
| 1553865_a_at | hypothetical protein DKFZp761H2121                                     | DKFZp761  | Hs.134065 | 0.00000    | 0.00000   | 1.57      | 2.98  |
| 242524_at    | cerebellin 4 precursor                                                 | CBLN4     | Hs.126141 | 0.00000    | 0.00000   | 1.57      | 2.97  |
| 202291_s_at  | matrix Gla protein                                                     | MGP       | Hs.365706 | 0.00000    | 0.00000   | 1.57      | 2.96  |
| 206577_at    | vasoactive intestinal peptide                                          | VIP       | Hs.53973  | 0.00000    | 0.00000   | 1.57      | 2.96  |
| 228913_at    | LOC440135 /// Homo sapiens, clone IMAGE:2900578, mRNA, partial cds     |           | Hs.375766 | 0.00000    | 0.00000   | 1.55      | 2.92  |
| 230882_at    | hypothetical protein FLJ34048                                          | FLJ34048  | Hs.34969  | 0.00000    | 0.00003   | 1.51      | 2.86  |
| 211597_s_at  | homeodomain-only protein /// homeodomain-only protein                  | HOP       | Hs.121443 | 0.00000    | 0.00000   | 1.49      | 2.81  |
| 215073_s_at  | nuclear receptor subfamily 2, group F, member 2                        | NR2F2     | Hs.347991 | 0.00000    | 0.00000   | 1.48      | 2.79  |
| 235085_at    | hypothetical protein DKFZp761P0423                                     | DKFZp761  | Hs.29068  | 0.00000    | 0.00000   | 1.48      | 2.79  |
| 220359_s_at  | cyclic AMP-regulated phosphoprotein, 21 kD                             | ARPP-21   | Hs.475902 | 0.00000    | 0.00000   | 1.47      | 2.78  |
| 230440_at    | zinc finger protein 469                                                | ZNF469    | Hs.54925  | 0.00000    | 0.00000   | 1.47      | 2.78  |
| 209120_at    | nuclear receptor subfamily 2, group F, member 2                        | NR2F2     | Hs.347991 | 0.00000    | 0.00000   | 1.47      | 2.76  |
| 1553822_at   | receptor transporting protein 1                                        | RTP1      | Hs.518480 | 0.00000    | 0.00000   | 1.47      | 2.76  |
| 205632_s_at  | phosphatidylinositol-4-phosphate 5-kinase, type I, beta                | PIP5K1B   | Hs.534371 | 0.00000    | 0.00000   | 1.46      | 2.76  |
| 229714_at    | heparan sulfate 6-O-sulfotransferase 3                                 | HS6ST3    | Hs.171001 | 0.00000    | 0.00000   | 1.44      | 2.72  |
| 201505_at    | laminin, beta 1                                                        | LAMB1     | Hs.489646 | 0.00000    | 0.00001   | 1.44      | 2.71  |
| 234331_s_at  | NSE1                                                                   | NSE1      | Hs.260855 | 0.00000    | 0.00000   | 1.44      | 2.71  |
| 237556_at    | Similar to BTG3 associated nuclear protein isoform b; BANP homolog; SM |           | Hs.460515 | 0.00000    | 0.00000   | 1.43      | 2.70  |

|              |                                                                            |                   |           |         |         |      |      |
|--------------|----------------------------------------------------------------------------|-------------------|-----------|---------|---------|------|------|
| 201141_at    | glycoprotein (transmembrane) nmb                                           | GNPMB             | Hs.190495 | 0.00000 | 0.00270 | 1.42 | 2.67 |
| 1553823_a_at | receptor transporting protein 1                                            | RTP1              | Hs.518480 | 0.00000 | 0.00001 | 1.41 | 2.66 |
| 213791_at    | proenkephalin                                                              | PENK              | Hs.339831 | 0.00002 | 0.00000 | 1.41 | 2.65 |
| 213924_at    | Metallophosphoesterase 1                                                   | MPPE1             | Hs.514713 | 0.00000 | 0.00000 | 1.40 | 2.64 |
| 236677_at    | neuroglobin                                                                | NGB               | Hs.274363 | 0.00004 | 0.00004 | 1.39 | 2.63 |
| 228329_at    | CDNA FLJ30779 fis, clone FEBRA2000815                                      |                   | Hs.4204   | 0.00000 | 0.00000 | 1.38 | 2.59 |
| 212552_at    | hippocalcin-like 1                                                         | HPCAL1            | Hs.467696 | 0.00000 | 0.00000 | 1.35 | 2.55 |
| 210021_s_at  | uracil-DNA glycosylase 2                                                   | UNG2              | Hs.3041   | 0.00013 | 0.00013 | 1.35 | 2.55 |
| 225975_at    | protocadherin 18                                                           | PCDH18            | Hs.518989 | 0.00000 | 0.00000 | 1.34 | 2.54 |
| 236714_at    | Similar to Dedicator of cytokinesis protein 9 (Cdc42 guanine nucleotide ex |                   | Hs.56400  | 0.00000 | 0.00000 | 1.34 | 2.54 |
| 237449_at    | Sp8 transcription factor                                                   | SP8               | Hs.195922 | 0.00000 | 0.00000 | 1.34 | 2.52 |
| 209763_at    | chordin-like 1                                                             | CHRDL1            | Hs.496587 | 0.00000 | 0.00008 | 1.33 | 2.51 |
| 214180_at    | MRNA; cDNA DKFZp564H203 (from clone DKFZp564H203)                          |                   | Hs.546727 | 0.00000 | 0.00000 | 1.33 | 2.51 |
| 243438_at    | phosphodiesterase 7B                                                       | PDE7B             | Hs.546364 | 0.00000 | 0.00000 | 1.31 | 2.49 |
| 240867_at    | Regulatory factor X, 3 (influences HLA class II expression)                | RFX3              | Hs.136829 | 0.00000 | 0.00005 | 1.31 | 2.48 |
| 228742_at    | Full length insert cDNA clone YQ54B06                                      |                   | Hs.133261 | 0.00000 | 0.00000 | 1.30 | 2.47 |
| 214091_s_at  | glutathione peroxidase 3 (plasma)                                          | GPX3              | Hs.386793 | 0.00000 | 0.00003 | 1.30 | 2.47 |
| 233002_at    | KIAA1622                                                                   | KIAA1622          | Hs.259599 | 0.00000 | 0.00000 | 1.30 | 2.46 |
| 227140_at    | Inhibin, beta A (activin A, activin AB alpha polypeptide)                  | INHBA             | Hs.28792  | 0.00000 | 0.00000 | 1.29 | 2.45 |
| 203661_s_at  | tropomodulin 1                                                             | TMOD1             | Hs.404289 | 0.00000 | 0.00000 | 1.29 | 2.45 |
| 223550_s_at  | carbonic anhydrase X                                                       | CA10              | Hs.463466 | 0.00000 | 0.00000 | 1.29 | 2.45 |
| 243139_at    | CDNA FLJ37676 fis, clone BRHIP2012627                                      |                   | Hs.552096 | 0.00003 | 0.00000 | 1.29 | 2.45 |
| 1561691_at   | hypothetical protein LOC285735                                             | LOC285735         | Hs.407549 | 0.00000 | 0.00004 | 1.28 | 2.43 |
| 236088_at    | netrin G1                                                                  | NTNG1             | Hs.211236 | 0.00004 | 0.00000 | 1.27 | 2.41 |
| 234335_s_at  | NSE1                                                                       | NSE1              | Hs.260855 | 0.00000 | 0.00000 | 1.27 | 2.40 |
| 219949_at    | leucine rich repeat containing 2                                           | LRRC2             | Hs.517936 | 0.00000 | 0.00000 | 1.26 | 2.39 |
| 241320_at    | R3H domain (binds single-stranded nucleic acids) containing                | R3HDM             | Hs.412462 | 0.00000 | 0.00208 | 1.24 | 2.36 |
| 230271_at    | Homo sapiens, clone IMAGE:4512785, mRNA                                    |                   | Hs.391856 | 0.00000 | 0.00000 | 1.24 | 2.36 |
| 216086_at    | synaptic vesicle glycoprotein 2C                                           | SV2C              | Hs.225974 | 0.00001 | 0.00003 | 1.24 | 2.36 |
| 235420_at    | hyaluronan and proteoglycan link protein 4                                 | HAPLN4            | Hs.367829 | 0.00000 | 0.00000 | 1.22 | 2.33 |
| 238663_x_at  | glutamate receptor, ionotropic, AMPA 4                                     | GRIA4             | Hs.503743 | 0.00000 | 0.00000 | 1.22 | 2.32 |
| 222664_at    | potassium channel tetramerisation domain containing 15                     | KCTD15            | Hs.221873 | 0.00000 | 0.00000 | 1.22 | 2.32 |
| 220313_at    | G-protein coupled receptor 88                                              | GPR88             | Hs.170053 | 0.00000 | 0.00000 | 1.22 | 2.32 |
| 1560554_a_at |                                                                            |                   |           | 0.00001 | 0.00001 | 1.21 | 2.32 |
| 209119_x_at  | nuclear receptor subfamily 2, group F, member 2                            | NR2F2             | Hs.347991 | 0.00000 | 0.00000 | 1.20 | 2.30 |
| 240690_at    | Hypothetical protein DKFZp761P0423                                         | DKFZp761P0423     | Hs.29068  | 0.00000 | 0.00000 | 1.19 | 2.29 |
| 236385_at    | Cholinergic receptor, nicotinic, alpha polypeptide 7                       | CHRNA7            | Hs.511772 | 0.00000 | 0.00000 | 1.18 | 2.26 |
| 233882_s_at  | sema domain, transmembrane domain (TM), and cytoplasmic                    | SEMA6D            | Hs.511265 | 0.00000 | 0.00009 | 1.18 | 2.26 |
| 212364_at    | myosin IB                                                                  | MYO1B             | Hs.439620 | 0.00000 | 0.00000 | 1.17 | 2.26 |
| 1568803_at   | Homo sapiens, clone IMAGE:5263088, mRNA                                    |                   | Hs.347841 | 0.00003 | 0.00010 | 1.17 | 2.25 |
| 212558_at    | sprouty homolog 1, antagonist of FGF signaling (Drosophila)                | SPRY1             | Hs.436944 | 0.00000 | 0.00000 | 1.16 | 2.24 |
| 211651_s_at  | laminin, beta 1 /// laminin, beta 1                                        | LAMB1             | Hs.489646 | 0.00000 | 0.00005 | 1.15 | 2.22 |
| 230403_at    | CDNA FLJ45905 fis, clone OCBBF3026576                                      |                   | Hs.438858 | 0.00000 | 0.00000 | 1.15 | 2.21 |
| 1557667_at   | CDNA FLJ36588 fis, clone TRACH2013991                                      |                   | Hs.49053  | 0.00000 | 0.00000 | 1.14 | 2.21 |
| 232111_at    | Homo sapiens, clone IMAGE:4214962, mRNA                                    |                   | Hs.455955 | 0.00000 | 0.00000 | 1.14 | 2.21 |
| 201348_at    | glutathione peroxidase 3 (plasma)                                          | GPX3              | Hs.386793 | 0.00000 | 0.00000 | 1.14 | 2.21 |
| 244617_at    | G protein-coupled receptor 26                                              | GPR26             | Hs.12751  | 0.00000 | 0.00000 | 1.14 | 2.20 |
| 222809_x_at  | chromosome 14 open reading frame 65                                        | C14orf65          | Hs.497591 | 0.00000 | 0.00000 | 1.14 | 2.20 |
| 203476_at    | trophoblast glycoprotein                                                   | TPBG              | Hs.82128  | 0.00004 | 0.00001 | 1.14 | 2.20 |
| 231859_at    | chromosome 14 open reading frame 132                                       | C14orf132         | Hs.6434   | 0.00000 | 0.00001 | 1.13 | 2.18 |
| 242093_at    |                                                                            |                   |           | 0.00000 | 0.00000 | 1.13 | 2.18 |
| 213325_at    | poliovirus receptor-related 3                                              | PVRL3             | Hs.293917 | 0.00000 | 0.00000 | 1.12 | 2.18 |
| 215005_at    | EF hand calcium binding protein 2                                          | EFCBP2            | Hs.140950 | 0.00000 | 0.00001 | 1.12 | 2.18 |
| 237094_at    | family with sequence similarity 19 (chemokine (C-C motif)-like)            | FAM19A5           | Hs.436854 | 0.00000 | 0.00000 | 1.12 | 2.17 |
| 219140_s_at  | retinol binding protein 4, plasma /// KIAA1922 protein                     | RBP4 /// KIAA1922 | Hs.546471 | 0.00000 | 0.00001 | 1.11 | 2.16 |
| 241970_at    | Poliovirus receptor-related 3                                              | PVRL3             | Hs.293917 | 0.00000 | 0.00001 | 1.11 | 2.16 |
| 238834_at    | Transcribed locus                                                          |                   | Hs.159282 | 0.00002 | 0.00000 | 1.11 | 2.16 |
| 205259_at    | nuclear receptor subfamily 3, group C, member 2                            | NR3C2             | Hs.163924 | 0.00000 | 0.00000 | 1.11 | 2.16 |
| 216268_s_at  | jagged 1 (Alagille syndrome)                                               | JAG1              | Hs.224012 | 0.00000 | 0.00000 | 1.10 | 2.15 |
| 209493_at    | PDZ domain containing 3                                                    | PDZK3             | Hs.481819 | 0.00000 | 0.00000 | 1.10 | 2.15 |
| 212667_at    | secreted protein, acidic, cysteine-rich (osteonectin)                      | SPARC             | Hs.111779 | 0.00000 | 0.00001 | 1.10 | 2.14 |
| 209099_x_at  | jagged 1 (Alagille syndrome)                                               | JAG1              | Hs.224012 | 0.00000 | 0.00000 | 1.10 | 2.14 |
| 231183_s_at  | Jagged 1 (Alagille syndrome)                                               | JAG1              | Hs.224012 | 0.00000 | 0.00000 | 1.09 | 2.13 |
| 1566528_at   | Cut-like 2 (Drosophila)                                                    | CUTL2             | Hs.124953 | 0.00001 | 0.00007 | 1.09 | 2.13 |
| 203662_s_at  | tropomodulin 1                                                             | TMOD1             | Hs.404289 | 0.00000 | 0.00000 | 1.09 | 2.12 |
| 206282_at    | neurogenic differentiation 1                                               | NEUROD1           | Hs.72981  | 0.00000 | 0.00000 | 1.08 | 2.12 |
| 206281_at    | adenylate cyclase activating polypeptide 1 (pituitary)                     | ADCYAP1           | Hs.531719 | 0.00000 | 0.00001 | 1.07 | 2.10 |
| 220325_at    | TAF7-like RNA polymerase II, TATA box binding protein (TBP                 | TAF7L             | Hs.223806 | 0.00000 | 0.00000 | 1.07 | 2.10 |
| 202421_at    | immunoglobulin superfamily, member 3                                       | IGSF3             | Hs.171057 | 0.00000 | 0.00000 | 1.07 | 2.10 |

|              |                                                                  |           |           |         |         |       |      |
|--------------|------------------------------------------------------------------|-----------|-----------|---------|---------|-------|------|
| 1566772_at   | Schwannomin interacting protein 1                                | SCHIP1    | Hs.134665 | 0.00000 | 0.00021 | 1.07  | 2.10 |
| 239673_at    | Nuclear receptor subfamily 3, group C, member 2                  | NR3C2     | Hs.163924 | 0.00000 | 0.00000 | 1.07  | 2.10 |
| 243526_at    | hypothetical protein LOC349136                                   | LOC349136 | Hs.174373 | 0.00000 | 0.00044 | 1.07  | 2.10 |
| 202436_s_at  | cytochrome P450, family 1, subfamily B, polypeptide 1            | CYP1B1    | Hs.154654 | 0.00000 | 0.00000 | 1.07  | 2.10 |
| 209822_s_at  | very low density lipoprotein receptor                            | VLDLR     | Hs.370422 | 0.00000 | 0.00000 | 1.06  | 2.09 |
| 220345_at    | leucine rich repeat transmembrane neuronal 4                     | LRRTM4    | Hs.285782 | 0.00000 | 0.00000 | 1.06  | 2.09 |
| 230788_at    | glucosaminyl (N-acetyl) transferase 2, l-branching enzyme        | GCNT2     | Hs.519884 | 0.00016 | 0.00003 | 1.06  | 2.08 |
| 213452_at    | zinc finger protein 184 (Kruppel-like)                           | ZNF184    | Hs.158174 | 0.00000 | 0.00008 | 1.06  | 2.08 |
| 222668_at    | potassium channel tetramerisation domain containing 15           | KCTD15    | Hs.221873 | 0.00001 | 0.00002 | 1.05  | 2.07 |
| 217671_at    | Regulatory factor X, 3 (influences HLA class II expression)      | RFX3      | Hs.136829 | 0.00001 | 0.00026 | 1.05  | 2.07 |
| 205249_at    | early growth response 2 (Krox-20 homolog, Drosophila)            | EGR2      | Hs.1395   | 0.00000 | 0.00161 | 1.05  | 2.06 |
| 220994_s_at  | syntaxin binding protein 6 (amisyn)                              | STXBP6    | Hs.508958 | 0.00000 | 0.00000 | 1.04  | 2.05 |
| 220889_s_at  | carbonic anhydrase X                                             | CA10      | Hs.463466 | 0.00000 | 0.00000 | 1.03  | 2.05 |
| 226905_at    | hypothetical protein MGC45871                                    | MGC45871  | Hs.345588 | 0.00000 | 0.00001 | 1.03  | 2.04 |
| 231439_at    | NSE1                                                             | NSE1      | Hs.260855 | 0.00000 | 0.00000 | 1.02  | 2.03 |
| 219461_at    | p21(CDKN1A)-activated kinase 6                                   | PAK6      | Hs.513645 | 0.00000 | 0.00009 | 1.02  | 2.03 |
| 232720_at    | Hypothetical protein FLJ31810                                    | FLJ31810  | Hs.145642 | 0.00000 | 0.00000 | 1.02  | 2.03 |
| 1555310_a_at | p21(CDKN1A)-activated kinase 6                                   | PAK6      | Hs.513645 | 0.00000 | 0.00007 | 1.02  | 2.03 |
| 219564_at    | potassium inwardly-rectifying channel, subfamily J, member 16    | KCNJ16    | Hs.463985 | 0.00000 | 0.00018 | 1.02  | 2.02 |
| 203789_s_at  | sema domain, immunoglobulin domain (Ig), short basic domain      | SEMA3C    | Hs.269109 | 0.00000 | 0.00000 | 1.01  | 2.02 |
| 237472_at    | SRY (sex determining region Y)-box 1                             | SOX1      | Hs.202526 | 0.00000 | 0.00000 | 1.00  | 2.00 |
| 219304_s_at  | platelet derived growth factor l                                 | PDGFD     | Hs.352298 | 0.00001 | 0.00000 | 1.00  | 2.00 |
| 236870_at    |                                                                  |           |           | 0.00007 | 0.00004 | -1.00 | 2.00 |
| 232856_at    | FLJ45686 protein                                                 | FLJ45686  | Hs.199853 | 0.00001 | 0.00001 | -1.00 | 2.00 |
| 228776_at    | gap junction protein, alpha 7, 45kDa (connexin 45)               | GJA7      | Hs.532593 | 0.00000 | 0.00000 | -1.01 | 2.01 |
| 239468_at    | chromosome 10 open reading frame 48                              | C10orf48  | Hs.128193 | 0.00000 | 0.00000 | -1.01 | 2.01 |
| 213880_at    | leucine-rich repeat-containing G protein-coupled receptor 5      | LGR5      | Hs.172176 | 0.00001 | 0.00003 | -1.01 | 2.01 |
| 239202_at    | RAB3B, member RAS oncogene family                                | RAB3B     | Hs.123072 | 0.00000 | 0.00000 | -1.02 | 2.02 |
| 228060_at    | solute carrier family 35, member F1                              | SLC35F1   | Hs.549284 | 0.00000 | 0.00000 | -1.02 | 2.02 |
| 1556325_at   | filamin A interacting protein 1                                  | FILIP1    | Hs.526972 | 0.00000 | 0.00131 | -1.02 | 2.03 |
| 233085_s_at  | hypothetical protein FLJ22833                                    | FLJ22833  | Hs.118183 | 0.00000 | 0.00000 | -1.02 | 2.03 |
| 204378_at    | breast carcinoma amplified sequence 1                            | BCAS1     | Hs.400556 | 0.00000 | 0.00000 | -1.02 | 2.03 |
| 205011_at    | loss of heterozygosity, 11, chromosomal region 2, gene A         | LOH11CR1  | Hs.152944 | 0.00008 | 0.00990 | -1.02 | 2.03 |
| 202589_at    | thymidylate synthetase                                           | TYMS      | Hs.369762 | 0.00011 | 0.00980 | -1.03 | 2.04 |
| 219750_at    | hypothetical protein FLJ11155                                    | FLJ11155  | Hs.176227 | 0.00006 | 0.00351 | -1.03 | 2.04 |
| 218170_at    | isochorismatase domain containing 1                              | ISOC1     | Hs.483296 | 0.00000 | 0.00000 | -1.03 | 2.04 |
| 223707_at    | hypothetical protein MGC10850                                    | MGC10850  |           | 0.00000 | 0.00022 | -1.03 | 2.05 |
| 205590_at    | RAS guanyl releasing protein 1 (calcium and DAG-regulated)       | RASGRP1   | Hs.511010 | 0.00000 | 0.00000 | -1.03 | 2.05 |
| 210102_at    | loss of heterozygosity, 11, chromosomal region 2, gene A         | LOH11CR1  | Hs.152944 | 0.00000 | 0.00000 | -1.03 | 2.05 |
| 239144_at    |                                                                  |           |           | 0.00000 | 0.00000 | -1.04 | 2.05 |
| 216617_s_at  | myelin associated glycoprotein                                   | MAG       | Hs.515354 | 0.00022 | 0.00617 | -1.04 | 2.05 |
| 221150_at    | matrix, extracellular phosphoglycoprotein with ASARM motif (d    | MEPE      | Hs.189587 | 0.00002 | 0.00000 | -1.04 | 2.06 |
| 238066_at    | retinol binding protein 7, cellular                              | RBP7      | Hs.422688 | 0.00000 | 0.00029 | -1.05 | 2.07 |
| 213103_at    | START domain containing 13                                       | STARD13   | Hs.507704 | 0.00000 | 0.00001 | -1.06 | 2.08 |
| 204872_at    | transducin-like enhancer of split 4 (E(sp1) homolog, Drosophila) | TLE4      | Hs.444213 | 0.00000 | 0.00000 | -1.06 | 2.09 |
| 229288_at    | EPH receptor A7                                                  | EPHA7     | Hs.73962  | 0.00000 | 0.00000 | -1.06 | 2.09 |
| 235616_at    | Chromosome 20 open reading frame 17                              | C20orf17  | Hs.473117 | 0.00000 | 0.00001 | -1.07 | 2.09 |
| 241772_at    | Protocadherin 11 Y-linked                                        | PCDH11Y   | Hs.546448 | 0.00022 | 0.00018 | -1.07 | 2.10 |
| 201012_at    | annexin A1                                                       | ANXA1     | Hs.494173 | 0.00008 | 0.00011 | -1.07 | 2.10 |
| 225666_at    | hypothetical protein FLJ14624                                    | FLJ14624  | Hs.190983 | 0.00000 | 0.00094 | -1.07 | 2.10 |
| 204400_at    | embryonal Fyn-associated substrate                               | EFS       | Hs.24587  | 0.00000 | 0.00956 | -1.07 | 2.10 |
| 229944_at    | CDNA FLJ13136 fis, clone NT2RP3003139                            |           | Hs.106795 | 0.00001 | 0.00002 | -1.08 | 2.11 |
| 230206_at    | Dedicator of cytokinesis 5                                       | DOCK5     | Hs.195403 | 0.00000 | 0.00063 | -1.08 | 2.11 |
| 1555958_at   | cartilage acidic protein 1                                       | CRTAC1    | Hs.500741 | 0.00000 | 0.00115 | -1.08 | 2.11 |
| 1568812_at   | Homo sapiens, clone IMAGE:5294477, mRNA                          |           | Hs.382116 | 0.00000 | 0.00001 | -1.08 | 2.12 |
| 226342_at    | Spectrin, beta, non-erythrocytic 1                               | SPTBN1    | Hs.503178 | 0.00000 | 0.00044 | -1.09 | 2.12 |
| 226302_at    | ATPase, Class I, type 8B, member 1                               | ATP8B1    | Hs.216623 | 0.00000 | 0.00000 | -1.09 | 2.12 |
| 236234_at    | phosphodiesterase 1A, calmodulin-dependent                       | PDE1A     | Hs.416061 | 0.00000 | 0.00000 | -1.09 | 2.12 |
| 209771_x_at  | CD24 antigen (small cell lung carcinoma cluster 4 antigen)       | CD24      | Hs.375108 | 0.00004 | 0.00119 | -1.10 | 2.14 |
| 1556200_a_at | chromosome 10 open reading frame 90                              | C10orf90  | Hs.44939  | 0.00001 | 0.00092 | -1.10 | 2.14 |
| 223557_s_at  | transmembrane protein with EGF-like and two follistatin-like do  | TMEFF2    | Hs.144513 | 0.00000 | 0.00000 | -1.10 | 2.15 |
| 228891_at    | hypothetical protein LOC349236                                   | LOC349236 | Hs.494406 | 0.00000 | 0.00006 | -1.11 | 2.15 |
| 216379_x_at  | CD24 antigen (small cell lung carcinoma cluster 4 antigen)       | CD24      | Hs.375108 | 0.00006 | 0.00140 | -1.11 | 2.15 |
| 225727_at    | pleckstrin homology domain containing, family H (with MyTH4      | PLEKHH1   | Hs.546414 | 0.00000 | 0.00957 | -1.11 | 2.15 |
| 206456_at    | gamma-aminobutyric acid (GABA) A receptor, alpha 5               | GABRA5    | Hs.24969  | 0.00000 | 0.00164 | -1.11 | 2.16 |
| 235765_at    | transducin-like enhancer of split 4 (E(sp1) homolog, Drosophila) | TLE4      | Hs.444213 | 0.00000 | 0.00003 | -1.12 | 2.17 |
| 226834_at    | Adipocyte-specific adhesion molecule                             | ASAM      | Hs.504187 | 0.00001 | 0.00000 | -1.12 | 2.18 |
| 210657_s_at  | septin 4                                                         | 4-Sep     | Hs.287518 | 0.00000 | 0.00401 | -1.13 | 2.18 |
| 227856_at    | hypothetical protein FLJ39370                                    | FLJ39370  | Hs.23439  | 0.00058 | 0.00062 | -1.13 | 2.18 |



|             |                                                                 |           |           |         |         |       |      |
|-------------|-----------------------------------------------------------------|-----------|-----------|---------|---------|-------|------|
| 228438_at   | CDNA FLJ41321 fis, clone BRAMY2045299                           |           | Hs.535929 | 0.00000 | 0.00004 | -1.13 | 2.20 |
| 209842_at   | SRY (sex determining region Y)-box 10                           | SOX10     | Hs.376984 | 0.00000 | 0.00005 | -1.14 | 2.20 |
| 228485_s_at | CDW92 antigen                                                   | CDW92     | Hs.494700 | 0.00000 | 0.00520 | -1.14 | 2.20 |
| 210247_at   | synapsin II                                                     | SYN2      | Hs.445503 | 0.00000 | 0.00001 | -1.14 | 2.21 |
| 207659_s_at | myelin-associated oligodendrocyte basic protein                 | MOBP      | Hs.121333 | 0.00000 | 0.00000 | -1.14 | 2.21 |
| 223775_at   | hedgehog interacting protein                                    | HHIP      | Hs.507991 | 0.00003 | 0.00103 | -1.14 | 2.21 |
| 230207_s_at | Dedicator of cytokinesis 5                                      | DOCK5     | Hs.195403 | 0.00000 | 0.00088 | -1.14 | 2.21 |
| 1561368_at  | Homo sapiens, clone IMAGE:5194369, mRNA                         |           | Hs.427900 | 0.00008 | 0.00010 | -1.15 | 2.21 |
| 233910_at   | transmembrane protein with EGF-like and two follistatin-like do | TMEFF2    | Hs.144513 | 0.00000 | 0.00039 | -1.15 | 2.22 |
| 229228_at   | cAMP responsive element binding protein 5                       | CREB5     | Hs.437075 | 0.00000 | 0.00056 | -1.15 | 2.22 |
| 230263_s_at | dedicator of cytokinesis 5                                      | DOCK5     | Hs.195403 | 0.00000 | 0.00144 | -1.15 | 2.22 |
| 212922_s_at | SET and MYND domain containing 2                                | SMYD2     | Hs.66170  | 0.00000 | 0.00000 | -1.16 | 2.23 |
| 221868_at   | KIAA1155 protein                                                | KIAA1155  | Hs.416735 | 0.00000 | 0.00000 | -1.16 | 2.23 |
| 203042_at   | lysosomal-associated membrane protein 2                         | LAMP2     | Hs.496684 | 0.00000 | 0.00035 | -1.16 | 2.24 |
| 205656_at   | protocadherin 17                                                | PCDH17    | Hs.106511 | 0.00008 | 0.00007 | -1.17 | 2.25 |
| 228653_at   | Similar to RIKEN cDNA E130306M17 gene                           |           | Hs.269122 | 0.00000 | 0.00000 | -1.17 | 2.25 |
| 213601_at   |                                                                 |           |           | 0.00000 | 0.00000 | -1.17 | 2.25 |
| 227995_at   | MRNA; cDNA DKFZp564O0862 (from clone DKFZp564O0862)             |           | Hs.99472  | 0.00000 | 0.00000 | -1.17 | 2.25 |
| 226136_at   |                                                                 |           |           | 0.00000 | 0.00001 | -1.17 | 2.25 |
| 225822_at   | hypothetical protein MGC17299                                   | MGC17299  | Hs.104476 | 0.00004 | 0.00125 | -1.17 | 2.25 |
| 213273_at   | odz, odd Oz/ten-m homolog 4 (Drosophila)                        | ODZ4      | Hs.213087 | 0.00000 | 0.00000 | -1.18 | 2.26 |
| 209072_at   | myelin basic protein                                            | MBP       | Hs.501262 | 0.00000 | 0.00036 | -1.18 | 2.27 |
| 208396_s_at | phosphodiesterase 1A, calmodulin-dependent                      | PDE1A     | Hs.416061 | 0.00000 | 0.00000 | -1.19 | 2.27 |
| 214064_at   | transferrin                                                     | TF        | Hs.518267 | 0.00000 | 0.00017 | -1.19 | 2.28 |
| 1558541_at  | hypothetical protein FLJ36980                                   | FLJ36980  | Hs.202521 | 0.00001 | 0.00364 | -1.19 | 2.28 |
| 223349_s_at | BCL2-related ovarian killer                                     | BOK       | Hs.293753 | 0.00007 | 0.00028 | -1.19 | 2.29 |
| 204529_s_at | thymus high mobility group box protein TOX                      | TOX       | Hs.491805 | 0.00000 | 0.00003 | -1.19 | 2.29 |
| 219429_at   | fatty acid 2-hydroxylase                                        | FA2H      | Hs.461329 | 0.00000 | 0.00019 | -1.20 | 2.29 |
| 205404_at   | hydroxysteroid (11-beta) dehydrogenase 1                        | HSD11B1   | Hs.195040 | 0.00004 | 0.00284 | -1.20 | 2.30 |
| 204073_s_at | chromosome 11 open reading frame 9                              | C11orf9   | Hs.473109 | 0.00000 | 0.00002 | -1.21 | 2.31 |
| 207191_s_at | immunoglobulin superfamily containing leucine-rich repeat       | ISLR      | Hs.513022 | 0.00001 | 0.00000 | -1.22 | 2.33 |
| 1552742_at  | potassium voltage-gated channel, subfamily H (eag-related), n   | KCNH8     | Hs.475656 | 0.00000 | 0.00424 | -1.22 | 2.34 |
| 233220_at   | glutamate receptor, ionotropic, N-methyl-D-aspartate 3A         | GRIN3A    | Hs.283852 | 0.00000 | 0.00000 | -1.23 | 2.34 |
| 231213_at   | phosphodiesterase 1A, calmodulin-dependent                      | PDE1A     | Hs.416061 | 0.00000 | 0.00001 | -1.23 | 2.35 |
| 1557943_at  | 2',3'-cyclic nucleotide 3' phosphodiesterase                    | CNP       | Hs.273621 | 0.00000 | 0.00007 | -1.23 | 2.35 |
| 228807_at   | Transcribed locus                                               |           | Hs.80714  | 0.00000 | 0.00227 | -1.24 | 2.36 |
| 213110_s_at | collagen, type IV, alpha 5 (Alport syndrome)                    | COL4A5    | Hs.369089 | 0.00000 | 0.00421 | -1.24 | 2.36 |
| 204519_s_at | plasma membrane proteolipid (plasmolipin)                       | PLLP      | Hs.200821 | 0.00000 | 0.00600 | -1.24 | 2.37 |
| 230537_at   |                                                                 |           |           | 0.00015 | 0.00093 | -1.26 | 2.39 |
| 206498_at   | oculocutaneous albinism II (pink-eye dilution homolog, mouse)   | OCA2      | Hs.130937 | 0.00000 | 0.00000 | -1.26 | 2.39 |
| 228863_at   | Hypothetical protein LOC144997                                  | PCDH17    | Hs.106511 | 0.00000 | 0.00000 | -1.26 | 2.40 |
| 266_s_at    | CD24 antigen (small cell lung carcinoma cluster 4 antigen)      | CD24      | Hs.375108 | 0.00006 | 0.00177 | -1.26 | 2.40 |
| 214475_x_at | calpain 3, (p94)                                                | CAPN3     | Hs.143261 | 0.00006 | 0.00817 | -1.26 | 2.40 |
| 230863_at   | Low density lipoprotein-related protein 2                       | LRP2      | Hs.470538 | 0.00000 | 0.00000 | -1.27 | 2.41 |
| 35974_at    | lymphoid-restricted membrane protein                            | LRMP      | Hs.124922 | 0.00000 | 0.00000 | -1.27 | 2.41 |
| 238246_at   | Metallothionein-like 5, testis-specific (tesmin)                | MTL5      | Hs.145932 | 0.00000 | 0.00005 | -1.27 | 2.42 |
| 228984_at   | KIAA1394 protein                                                | KIAA1394  | Hs.502982 | 0.00000 | 0.00631 | -1.28 | 2.43 |
| 206135_at   | suppression of tumorigenicity 18 (breast carcinoma) (zinc fing  | ST18      | Hs.549092 | 0.00000 | 0.00055 | -1.28 | 2.43 |
| 206805_at   | sema domain, immunoglobulin domain (Ig), short basic domain     | SEMA3A    | Hs.252451 | 0.00000 | 0.00009 | -1.29 | 2.44 |
| 213059_at   | cAMP responsive element binding protein 3-like 1                | CREB3L1   | Hs.405961 | 0.00000 | 0.00000 | -1.29 | 2.45 |
| 226117_at   | TRAF-interacting protein with a forkhead-associated domain      | TIFA      | Hs.310640 | 0.00000 | 0.00000 | -1.29 | 2.45 |
| 204733_at   | kallikrein 6 (neurosin, zyme)                                   | KLK6      | Hs.79361  | 0.00004 | 0.00016 | -1.29 | 2.45 |
| 224794_s_at | cerebral endothelial cell adhesion molecule 1                   | CEECAM1   | Hs.495230 | 0.00000 | 0.00009 | -1.30 | 2.46 |
| 228601_at   | hypothetical LOC401022                                          | LOC40102  | Hs.98661  | 0.00000 | 0.00006 | -1.30 | 2.47 |
| 226213_at   | v-erb-b2 erythroblastic leukemia viral oncogene homolog 3 (av   | ERBB3     | Hs.118681 | 0.00000 | 0.00007 | -1.31 | 2.48 |
| 228090_at   | nicotinamide nucleotide adenyltransferase 3                     | NMNAT3    | Hs.208673 | 0.00000 | 0.00030 | -1.32 | 2.49 |
| 209955_s_at | fibroblast activation protein, alpha                            | FAP       | Hs.516493 | 0.00000 | 0.00001 | -1.32 | 2.50 |
| 204621_s_at | nuclear receptor subfamily 4, group A, member 2                 | NR4A2     | Hs.165258 | 0.00001 | 0.00001 | -1.32 | 2.50 |
| 209631_s_at | G protein-coupled receptor 37 (endothelin receptor type B-like) | GPR37     | Hs.406094 | 0.00000 | 0.00085 | -1.33 | 2.51 |
| 232165_at   | epiplakin 1                                                     | EPPK1     | Hs.200412 | 0.00002 | 0.00001 | -1.33 | 2.51 |
| 205989_s_at | myelin oligodendrocyte glycoprotein                             | MOG       | Hs.141308 | 0.00003 | 0.00004 | -1.33 | 2.51 |
| 226636_at   | phospholipase D1, phosphatidylcholine-specific                  | PLD1      | Hs.478230 | 0.00001 | 0.00051 | -1.33 | 2.52 |
| 230135_at   | CDNA FLJ42405 fis, clone ASTRO3000474                           |           | Hs.548089 | 0.00000 | 0.00055 | -1.34 | 2.53 |
| 205801_s_at | RAS guanyl releasing protein 3 (calcium and DAG-regulated)      | RASGRP3   | Hs.143674 | 0.00000 | 0.00005 | -1.34 | 2.53 |
| 211303_x_at | prostate-specific membrane antigen-like                         | PSMAL     | Hs.511922 | 0.00000 | 0.00008 | -1.34 | 2.54 |
| 227289_at   | hypothetical protein LOC144997                                  | LOC144997 |           | 0.00000 | 0.00055 | -1.35 | 2.55 |
| 214803_at   | CDNA clone IMAGE:4152983, partial cds                           |           | Hs.124776 | 0.00000 | 0.00000 | -1.36 | 2.57 |
| 204037_at   |                                                                 |           |           | 0.00000 | 0.00002 | -1.36 | 2.57 |
| 209869_at   | adrenergic, alpha-2A-, receptor /// adrenergic, alpha-2A-, rece | ADRA2A    | Hs.249159 | 0.00000 | 0.00001 | -1.37 | 2.59 |

|              |                                                                            |           |           |         |         |       |      |
|--------------|----------------------------------------------------------------------------|-----------|-----------|---------|---------|-------|------|
| 219414_at    | calsyntenin 2                                                              | CLSTN2    | Hs.158529 | 0.00000 | 0.00000 | -1.38 | 2.60 |
| 223058_at    | chromosome 10 open reading frame 45                                        | C10orf45  | Hs.446315 | 0.00000 | 0.00000 | -1.38 | 2.60 |
| 204036_at    | endothelial differentiation, lysophosphatidic acid G-protein-cou           | EDG2      | Hs.126667 | 0.00000 | 0.00030 | -1.38 | 2.61 |
| 229781_at    | LOC442530                                                                  |           | Hs.304253 | 0.00009 | 0.00310 | -1.39 | 2.63 |
| 214841_at    | cornichon homolog 3 (Drosophila)                                           | CNIH3     | Hs.97338  | 0.00000 | 0.00000 | -1.39 | 2.63 |
| 210839_s_at  | ectonucleotide pyrophosphatase/phosphodiesterase 2 (autota                 | ENPP2     | Hs.190977 | 0.00000 | 0.00352 | -1.39 | 2.63 |
| 208358_s_at  | UDP glycosyltransferase 8 (UDP-galactose ceramide galactos                 | UGT8      | Hs.144197 | 0.00000 | 0.00000 | -1.40 | 2.64 |
| 223741_s_at  | tweety homolog 2 (Drosophila)                                              | TTYH2     | Hs.27935  | 0.00000 | 0.00314 | -1.40 | 2.64 |
| 210944_s_at  | calpain 3, (p94)                                                           | CAPN3     | Hs.143261 | 0.00000 | 0.00009 | -1.40 | 2.65 |
| 222608_s_at  | anillin, actin binding protein (scraps homolog, Drosophila)                | ANLN      | Hs.62180  | 0.00000 | 0.00009 | -1.40 | 2.65 |
| 228956_at    | UDP glycosyltransferase 8 (UDP-galactose ceramide galactos                 | UGT8      | Hs.144197 | 0.00001 | 0.00837 | -1.41 | 2.65 |
| 242765_at    | myelin-associated oligodendrocyte basic protein                            | MOBP      | Hs.121333 | 0.00000 | 0.00599 | -1.41 | 2.66 |
| 204204_at    | solute carrier family 31 (copper transporters), member 2                   | SLC31A2   | Hs.24030  | 0.00001 | 0.00915 | -1.41 | 2.66 |
| 238763_at    | RNA binding motif protein 20                                               | RBM20     | Hs.116630 | 0.00000 | 0.00000 | -1.41 | 2.67 |
| 227550_at    | hypothetical protein LOC143381                                             | LOC143381 | Hs.388347 | 0.00000 | 0.00133 | -1.42 | 2.67 |
| 240841_at    | insulinoma-associated 2                                                    | INSM2     | Hs.62813  | 0.00000 | 0.00000 | -1.42 | 2.67 |
| 204530_s_at  | thymus high mobility group box protein TOX                                 | TOX       | Hs.491805 | 0.00000 | 0.00000 | -1.42 | 2.68 |
| 241717_at    | hypothetical protein LOC285281                                             | LOC285281 |           | 0.00000 | 0.00000 | -1.42 | 2.68 |
| 204777_s_at  | mal, T-cell differentiation protein                                        | MAL       | Hs.80395  | 0.00000 | 0.00220 | -1.43 | 2.69 |
| 34210_at     | CD52 antigen (CAMPATH-1 antigen)                                           | CD52      | Hs.276770 | 0.00002 | 0.00000 | -1.43 | 2.70 |
| 237187_at    | Transcribed locus, strongly similar to XP_509406.1 similar to hypothetical |           | Hs.153034 | 0.00000 | 0.00000 | -1.44 | 2.71 |
| 230087_at    | Proline rich membrane anchor 1                                             | PRIMA1    | Hs.432401 | 0.00000 | 0.00015 | -1.44 | 2.71 |
| 207323_s_at  | myelin basic protein                                                       | MBP       | Hs.501262 | 0.00002 | 0.00617 | -1.44 | 2.72 |
| 213183_s_at  | Cyclin-dependent kinase inhibitor 1C (p57, Kip2)                           | CDKN1C    | Hs.106070 | 0.00000 | 0.00000 | -1.45 | 2.72 |
| 241898_at    | Transcribed locus, moderately similar to XP_517655.1 similar to KIAA082    |           | Hs.351126 | 0.00000 | 0.00000 | -1.45 | 2.74 |
| 214586_at    | G protein-coupled receptor 37 (endothelin receptor type B-like)            | GPR37     | Hs.406094 | 0.00001 | 0.00779 | -1.46 | 2.75 |
| 238756_at    | Growth arrest-specific 2 like 3                                            | GAS2L3    | Hs.20575  | 0.00000 | 0.00000 | -1.46 | 2.75 |
| 205943_at    | tryptophan 2,3-dioxygenase                                                 | TDO2      | Hs.183671 | 0.00000 | 0.00000 | -1.47 | 2.77 |
| 227123_at    | RAB3B, member RAS oncogene family                                          | RAB3B     | Hs.123072 | 0.00000 | 0.00001 | -1.49 | 2.82 |
| 206030_at    | aspartoacylase (aminoacylase 2, Canavan disease)                           | ASPA      | Hs.171142 | 0.00000 | 0.00051 | -1.50 | 2.82 |
| 243154_at    | Transcribed locus                                                          |           | Hs.86650  | 0.00000 | 0.00000 | -1.51 | 2.84 |
| 214597_at    | somatostatin receptor 2                                                    | SSTR2     | Hs.514451 | 0.00000 | 0.00000 | -1.51 | 2.84 |
| 217992_s_at  | EF hand domain family, member D2                                           | EFHD2     | Hs.465374 | 0.00000 | 0.00000 | -1.51 | 2.84 |
| 231911_at    | KIAA1189                                                                   | KIAA1189  | Hs.443894 | 0.00000 | 0.00085 | -1.51 | 2.85 |
| 230360_at    | collomin                                                                   | COLM      | Hs.526441 | 0.00000 | 0.00059 | -1.51 | 2.85 |
| 1570515_a_at | filamin A interacting protein 1                                            | FILIP1    | Hs.526972 | 0.00000 | 0.00000 | -1.51 | 2.86 |
| 205303_at    | potassium inwardly-rectifying channel, subfamily J, member 8               | KCNJ8     | Hs.102308 | 0.00001 | 0.00000 | -1.52 | 2.87 |
| 212236_x_at  | keratin 17                                                                 | KRT17     | Hs.2785   | 0.00000 | 0.00000 | -1.53 | 2.88 |
| 205157_s_at  | keratin 17                                                                 | KRT17     | Hs.2785   | 0.00011 | 0.00001 | -1.53 | 2.89 |
| 211675_s_at  | MyoD family inhibitor domain containing /// MyoD family inhibi             | MDFIC     | Hs.546385 | 0.00000 | 0.00000 | -1.53 | 2.90 |
| 230593_at    | Transcribed locus                                                          |           | Hs.128848 | 0.00000 | 0.00000 | -1.54 | 2.90 |
| 212354_at    | sulfatase 1                                                                | SULF1     | Hs.409602 | 0.00000 | 0.00000 | -1.55 | 2.92 |
| 239031_at    | somatostatin receptor 2                                                    | SSTR2     | Hs.514451 | 0.00000 | 0.00000 | -1.56 | 2.95 |
| 228186_s_at  | thrombospondin, type I, domain containing 2                                | THSD2     | Hs.135254 | 0.00000 | 0.00000 | -1.57 | 2.97 |
| 206343_s_at  | neuregulin 1                                                               | NRG1      | Hs.453951 | 0.00000 | 0.00000 | -1.58 | 2.98 |
| 220120_s_at  | erythrocyte membrane protein band 4.1 like 4A                              | EPB41L4A  | Hs.551557 | 0.00000 | 0.00000 | -1.58 | 2.99 |
| 38149_at     | Rho GTPase activating protein 25                                           | ARHGAP2   | Hs.531807 | 0.00000 | 0.00000 | -1.58 | 2.99 |
| 204774_at    | ecotropic viral integration site 2A                                        | EVI2A     | Hs.113874 | 0.00000 | 0.00059 | -1.58 | 2.99 |
| 205860_x_at  | folate hydrolase (prostate-specific membrane antigen) 1                    | FOLH1     | Hs.380325 | 0.00000 | 0.00097 | -1.59 | 3.01 |
| 219643_at    | low density lipoprotein-related protein 1B (deleted in tumors)             | LRP1B     | Hs.470117 | 0.00000 | 0.00000 | -1.59 | 3.01 |
| 205549_at    | Purkinje cell protein 4                                                    | PCP4      | Hs.80296  | 0.00000 | 0.00000 | -1.59 | 3.02 |
| 204674_at    | lymphoid-restricted membrane protein                                       | LRMP      | Hs.124922 | 0.00000 | 0.00000 | -1.60 | 3.02 |
| 236576_at    | Transcribed locus                                                          |           | Hs.21375  | 0.00000 | 0.00000 | -1.60 | 3.03 |
| 214063_s_at  | transferrin                                                                | TF        | Hs.518267 | 0.00000 | 0.00009 | -1.60 | 3.04 |
| 232001_at    | hypothetical gene supported by AY007155                                    | LOC43994  | Hs.13262  | 0.00000 | 0.00000 | -1.63 | 3.09 |
| 215363_x_at  | folate hydrolase (prostate-specific membrane antigen) 1                    | FOLH1     | Hs.380325 | 0.00000 | 0.00022 | -1.64 | 3.11 |
| 204882_at    | Rho GTPase activating protein 25                                           | ARHGAP2   | Hs.531807 | 0.00000 | 0.00000 | -1.64 | 3.11 |
| 225710_at    | CDNA FLJ34013 fis, clone FCBBF2002111                                      |           | Hs.173030 | 0.00000 | 0.00000 | -1.65 | 3.15 |
| 210445_at    | fatty acid binding protein 6, ileal (gastrotropin)                         | FABP6     | Hs.519719 | 0.00000 | 0.00000 | -1.68 | 3.21 |
| 244521_at    | Transcribed locus                                                          |           | Hs.529382 | 0.00000 | 0.00000 | -1.68 | 3.21 |
| 229552_at    | hypothetical protein LOC283454                                             | LOC283454 | Hs.26605  | 0.00000 | 0.00000 | -1.69 | 3.22 |
| 233072_at    | netrin G2                                                                  | NTNG2     | Hs.163642 | 0.00000 | 0.00010 | -1.71 | 3.28 |
| 226272_at    | Full length insert cDNA clone ZD79H10                                      |           | Hs.22380  | 0.00000 | 0.00000 | -1.73 | 3.32 |
| 223699_at    | carnosine dipeptidase 1 (metallopeptidase M20 family)                      | CNDP1     | Hs.400613 | 0.00000 | 0.00019 | -1.73 | 3.33 |
| 220595_at    | PDZ domain containing RING finger 4                                        | PDZRN4    | Hs.380044 | 0.00000 | 0.00000 | -1.74 | 3.33 |
| 1556378_a_at | hypothetical gene supported by BC032955 /// hypothetical gen               | LOC40153  | Hs.521524 | 0.00000 | 0.00001 | -1.74 | 3.34 |
| 205304_s_at  | potassium inwardly-rectifying channel, subfamily J, member 8               | KCNJ8     | Hs.102308 | 0.00000 | 0.00000 | -1.76 | 3.40 |
| 228406_at    | SET and MYND domain containing 1                                           | SMYD1     | Hs.516176 | 0.00000 | 0.00000 | -1.77 | 3.40 |
| 235794_at    | myelin-associated oligodendrocyte basic protein                            | MOBP      | Hs.121333 | 0.00000 | 0.00000 | -1.80 | 3.48 |

|              |                                                                                |                    |           |         |         |       |       |
|--------------|--------------------------------------------------------------------------------|--------------------|-----------|---------|---------|-------|-------|
| 212353_at    | sulfatase 1                                                                    | SULF1              | Hs.409602 | 0.00000 | 0.00000 | -1.80 | 3.48  |
| 238577_s_at  | Transcribed locus                                                              |                    | Hs.32135  | 0.00000 | 0.00000 | -1.83 | 3.57  |
| 227867_at    | hypothetical protein LOC129293                                                 | LOC129293          | Hs.469134 | 0.00000 | 0.00000 | -1.86 | 3.63  |
| 221911_at    | ets variant gene 1 /// hypothetical protein LOC221810                          | ETV1 /// LOC221810 | Hs.22634  | 0.00000 | 0.00001 | -1.87 | 3.65  |
| 210038_at    | protein kinase C, theta                                                        | PRKCQ              | Hs.498570 | 0.00000 | 0.00000 | -1.87 | 3.66  |
| 240418_at    | Transcribed locus                                                              |                    | Hs.32135  | 0.00000 | 0.00000 | -1.92 | 3.78  |
| 207307_at    | 5-hydroxytryptamine (serotonin) receptor 2C                                    | HTR2C              | Hs.149037 | 0.00000 | 0.00000 | -1.98 | 3.93  |
| 213348_at    | Cyclin-dependent kinase inhibitor 1C (p57, Kip2)                               | CDKN1C             | Hs.106070 | 0.00000 | 0.00000 | -2.00 | 4.01  |
| 210121_at    | UDP-Gal:betaGlcNAc beta 1,3-galactosyltransferase, polypeptide 2               | B3GALT2            | Hs.518834 | 0.00000 | 0.00000 | -2.05 | 4.13  |
| 210729_at    | neuropeptide Y receptor Y2                                                     | NPY2R              | Hs.37125  | 0.00000 | 0.00000 | -2.07 | 4.19  |
| 214414_x_at  | hemoglobin, alpha 2 /// hemoglobin, alpha 2                                    | HBA2               | Hs.398636 | 0.00005 | 0.00331 | -2.07 | 4.21  |
| 217452_s_at  | UDP-Gal:betaGlcNAc beta 1,3-galactosyltransferase, polypeptide 2               | B3GALT2            | Hs.518834 | 0.00000 | 0.00000 | -2.09 | 4.26  |
| 231945_at    | filamin A interacting protein 1                                                | FILIP1             | Hs.526972 | 0.00000 | 0.00000 | -2.16 | 4.47  |
| 226415_at    | KIAA1576 protein                                                               | KIAA1576           | Hs.461405 | 0.00000 | 0.00000 | -2.26 | 4.78  |
| 235183_at    | Homo sapiens, clone IMAGE:5312689, mRNA                                        |                    | Hs.548069 | 0.00000 | 0.00000 | -2.26 | 4.80  |
| 206454_s_at  | rhodopsin (opsin 2, rod pigment) (retinitis pigmentosa 4, autosomal recessive) | RHO                | Hs.247565 | 0.00000 | 0.00000 | -2.27 | 4.82  |
| 229580_at    | Transcribed locus                                                              |                    | Hs.7413   | 0.00000 | 0.00000 | -2.29 | 4.90  |
| 213385_at    | Chimerin (chimaerin) 2                                                         | CHN2               | Hs.203663 | 0.00000 | 0.00000 | -2.31 | 4.96  |
| 1552715_a_at | leucine-rich repeat-containing G protein-coupled receptor 7                    | LGR7               | Hs.196119 | 0.00000 | 0.00000 | -2.31 | 4.96  |
| 228915_at    | dachshund homolog 1 (Drosophila)                                               | DACH1              | Hs.129452 | 0.00000 | 0.00000 | -2.34 | 5.07  |
| 233972_s_at  | zinc finger protein 312                                                        | ZNF312             | Hs.241523 | 0.00000 | 0.00000 | -2.35 | 5.08  |
| 229538_s_at  | IQ motif containing GTPase activating protein 3                                | IQGAP3             | Hs.133294 | 0.00000 | 0.00000 | -2.41 | 5.30  |
| 229490_s_at  | IQ motif containing GTPase activating protein 3                                | IQGAP3             | Hs.133294 | 0.00000 | 0.00000 | -2.42 | 5.35  |
| 204622_x_at  | nuclear receptor subfamily 4, group A, member 2                                | NR4A2              | Hs.165258 | 0.00000 | 0.00000 | -2.45 | 5.46  |
| 205374_at    | sarcolipin                                                                     | SLN                | Hs.334629 | 0.00000 | 0.00000 | -2.47 | 5.55  |
| 218469_at    | gremlin 1 homolog, cysteine knot superfamily (Xenopus laevis)                  | GREM1              | Hs.40098  | 0.00000 | 0.00000 | -2.53 | 5.76  |
| 229670_at    | 5.5 kb mRNA upregulated in retinoic acid treated HL-60 neutrophilic cells.     |                    | Hs.180284 | 0.00000 | 0.00000 | -2.56 | 5.89  |
| 231804_at    | Transcribed locus                                                              |                    |           | 0.00000 | 0.00000 | -2.57 | 5.94  |
| 219370_at    | reprimin 1, TP53 dependant G2 arrest mediator candidate                        | RPRM               | Hs.100890 | 0.00000 | 0.00000 | -2.62 | 6.16  |
| 216248_s_at  | nuclear receptor subfamily 4, group A, member 2                                | NR4A2              | Hs.165258 | 0.00000 | 0.00000 | -2.65 | 6.30  |
| 235201_at    | Transcribed locus                                                              |                    |           | 0.00000 | 0.00000 | -2.79 | 6.93  |
| 210809_s_at  | periostin, osteoblast specific factor                                          | POSTN              | Hs.136348 | 0.00000 | 0.00000 | -2.82 | 7.05  |
| 243278_at    | Transcribed locus                                                              |                    | Hs.547776 | 0.00000 | 0.00000 | -2.95 | 7.74  |
| 229070_at    | chromosome 6 open reading frame 105                                            | C6orf105           | Hs.126409 | 0.00000 | 0.00000 | -3.05 | 8.28  |
| 238206_at    | Transcribed locus                                                              |                    |           | 0.00000 | 0.00000 | -3.07 | 8.41  |
| 228206_at    | heparan sulfate (glucosamine) 3-O-sulfotransferase 4                           | HS3ST4             | Hs.549096 | 0.00000 | 0.00000 | -3.09 | 8.52  |
| 1558971_at   | chromosome 6 open reading frame 190                                            | C6orf190           | Hs.380210 | 0.00000 | 0.00000 | -3.41 | 10.66 |
| 206941_x_at  | sema domain, immunoglobulin domain (Ig), short basic domain                    | SEMA3E             | Hs.528721 | 0.00000 | 0.00000 | -3.61 | 12.20 |
| 219697_at    | heparan sulfate (glucosamine) 3-O-sulfotransferase 2                           | HS3ST2             | Hs.115830 | 0.00000 | 0.00000 | -4.18 | 18.11 |
| 221086_s_at  | zinc finger protein 312                                                        | ZNF312             | Hs.241523 | 0.00000 | 0.00000 | -4.50 | 22.56 |
| 1558972_s_at | chromosome 6 open reading frame 19                                             | C6orf190           | Hs.380210 | 0.00000 | 0.00000 | -5.30 | 39.41 |
